# Supplementary material for: Staphylococcus aureus ST764-SCCmecII high-risk clone in bloodstream infections revealed through national genomic surveillance integrating clinical data
Source: Research Square preprint supplement (doi:10.21203/rs.3.rs-4824867/v1), 2024-08-05
Supplement: Supplementary file 1 [file e245217caa2c96eaaec75e88.xlsx]

## Sheet: Supplementary Table 1
Supplementary Table 1. Metadata of 580 S. aureus isolates in JARBS-SA (2019-2020).																								VFGs*
ID	BioProject accession#	BioSample accession#	Run accession#	isolate_date	Sex	Age	source	infected nest	Area	Prefectures	BAPS No.	ST	arcC	aroE	glpF	gmk	pta	tpi	yqiL	CC	spa type	SCCmec type	ACME	sea	seb	sec	sed	see	tst1	seg	seh	sei	selj	sek	sel	sem	sen	seo	sep	seq	ser	ses	set	seu	sev	selw	selx	sey	selz
01040-19-S001	PRJDB15501	SAMD00590887	DRR456294	2019-09-28	male	76y	blood	device-related infection	East Japan	Hokkaido	SC4	7463	13	13	893	1	12	11	13	15	t1034	-	-	-	-	-	-	-	-	-	-	-	-	-	-	-	-	-	-	-	-	-	-	-	-	-	+	-	-
01040-19-S002	PRJDB15501	SAMD00590888	DRR456295, DRR546374	2019-09-30	male	76y	blood	device-related infection	East Japan	Hokkaido	SC8	764	1	136	1	4	12	1	10	5	t062	IIa	-	-	+	-	-	-	-	+	-	+	-	-	-	+	+	+	-	-	-	-	-	-	-	-	+	-	-
01040-19-S004	PRJDB15501	SAMD00590889	DRR456296	2019-11-04	female	87y	blood	device-related infection	East Japan	Hokkaido	SC13	718	19	122	12	2	13	89	15	50	ND	-	-	-	-	-	-	-	-	-	-	-	-	-	-	-	-	-	-	-	-	-	-	-	-	-	+	-	-
01040-19-S005	PRJDB15501	SAMD00590890	DRR456297	2019-11-18	male	74y	blood	infectious endocarditis	East Japan	Hokkaido	SC10	7464	2	2	916	2	6	3	2	30	t2868	-	-	-	+	-	-	-	+	+	-	+	-	+	-	+	+	+	-	+	-	-	-	+	-	+	-	-	-
01040-19-S006	PRJDB15501	SAMD00590891	DRR456298	2019-11-27	male	40y	blood	bone infection	East Japan	Hokkaido	SC13	7465	19	122	12	2	889	89	15	50	t1442	-	-	-	-	-	-	-	-	-	-	-	-	-	-	-	-	-	-	-	-	-	-	-	-	-	+	-	-
01040-19-S009	PRJDB15501	SAMD00590892	DRR456299	2019-12-12	female	93y	blood	device-related infection	East Japan	Hokkaido	SC11	291	3	37	19	2	20	26	32	398	t937	-	-	-	-	-	-	-	-	-	-	-	-	-	-	-	-	-	-	-	-	-	-	-	-	-	-	-	-
01040-19-S010	PRJDB15501	SAMD00590893	DRR456300	2019-12-13	female	88y	blood	device-related infection	East Japan	Hokkaido	SC4	7466	13	13	1	1	12	11	990	15	t085	-	-	-	-	-	-	-	-	-	-	-	-	-	-	-	-	-	-	-	-	-	-	-	-	-	+	-	-
01040-19-S011	PRJDB15501	SAMD00590894	DRR456301	2019-12-16	male	67y	blood	pneumonia	East Japan	Hokkaido	SC1	1	1	1	1	1	1	1	1	1	t1784	IVa	-	+	-	-	-	-	-	-	+	-	-	+	-	-	-	-	-	+	-	-	-	-	-	-	+	-	-
01040-19-S013	PRJDB15501	SAMD00590895	DRR456302	2019-12-21	female	89y	blood	bone infection	East Japan	Hokkaido	SC8	5	1	4	1	4	12	1	10	5	t002	IVa	-	-	-	-	-	-	+	+	-	+	-	-	-	+	+	+	+	-	-	-	-	-	-	-	+	-	-
01040-19-S014	PRJDB15501	SAMD00590896	DRR456303	2019-12-23	female	76y	blood	bone infection	East Japan	Hokkaido	SC9	508	10	40	8	6	10	3	2	508	t9438	-	-	-	-	-	-	-	-	+	-	+	-	-	-	+	+	+	-	-	-	-	-	-	-	+	+	-	-
01040-19-S015	PRJDB15501	SAMD00590897	DRR456304	2020-01-17	male	60y	blood	infectious endocarditis	East Japan	Hokkaido	SC1	81	1	1	1	9	1	1	1	81	t127	-	-	+	-	-	-	-	-	-	+	-	-	+	-	-	-	-	-	+	-	-	-	-	-	-	+	-	-
01040-19-S016	PRJDB15501	SAMD00590898	DRR456305	2020-01-17	female	67y	blood	skin and soft tissue infection	East Japan	Hokkaido	SC2	188	3	1	1	8	1	1	1	188	t189	-	-	-	-	-	-	-	-	-	-	-	-	-	-	-	-	-	-	-	-	-	-	-	-	-	+	-	-
01040-19-S017	PRJDB15501	SAMD00590899	DRR456306	2020-02-03	male	51y	blood	infectious endocarditis	East Japan	Hokkaido	SC1	1	1	1	1	1	1	1	1	1	t1784	IVa	-	+	-	-	-	-	-	-	+	-	-	+	-	-	-	-	-	+	-	-	-	-	-	-	+	-	-
01040-19-S018	PRJDB15501	SAMD00590900	DRR456307	2020-02-09	male	71y	blood	bone infection	East Japan	Hokkaido	SC13	718	19	122	12	2	13	89	15	50	t1442	-	-	-	-	-	-	-	-	-	-	-	-	-	-	-	-	-	-	-	-	-	-	-	-	-	+	-	-
01040-19-S019	PRJDB15501	SAMD00590901	DRR456308	2020-02-09	female	58y	blood	device-related infection	East Japan	Hokkaido	SC3	630	12	3	1	1	4	4	3	8	t377	-	-	-	-	-	-	-	-	-	-	-	-	-	-	-	-	-	-	-	-	-	-	-	-	-	+	-	-
01040-19-S020	PRJDB15501	SAMD00590902	DRR456309	2020-03-18	male	72y	blood	device-related infection	East Japan	Hokkaido	SC10	30	2	2	2	2	6	3	2	30	t1827	-	-	+	-	-	-	-	+	+	-	+	-	-	-	+	+	+	-	-	-	-	-	+	-	+	-	-	-
01040-19-S021	PRJDB15501	SAMD00590903	DRR456310	2020-03-23	male	72y	blood	device-related infection	East Japan	Hokkaido	SC1	1	1	1	1	1	1	1	1	1	t1784	IVk	-	-	-	-	-	-	-	-	+	-	-	-	-	-	-	-	-	-	-	-	-	-	-	-	+	-	-
01040-19-S022	PRJDB15501	SAMD00590904	DRR456311	2020-03-27	female	80y	blood	device-related infection	East Japan	Hokkaido	SC10	30	2	2	2	2	6	3	2	30	t3427	-	-	-	-	-	-	-	-	+	-	+	-	-	-	+	+	+	-	-	-	-	-	+	-	+	-	-	-
01040-19-S023	PRJDB15501	SAMD00590905	DRR456312, DRR457464	2020-04-02	female	73y	blood	unknown	East Japan	Hokkaido	SC2	188	3	1	1	8	1	1	1	188	t693	-	-	-	-	-	-	-	-	-	-	-	-	-	-	-	-	-	-	-	-	-	-	-	-	-	+	-	-
01040-19-S024	PRJDB15501	SAMD00590906	DRR456313	2020-04-06	male	75y	blood	device-related infection	East Japan	Hokkaido	SC1	1	1	1	1	1	1	1	1	1	t1784	IVa	-	+	-	-	-	-	-	-	+	-	-	+	-	-	-	-	-	+	-	-	-	-	-	-	+	-	-
01040-19-S025	PRJDB15501	SAMD00590907	DRR456314	2020-04-05	female	85y	blood	others	East Japan	Hokkaido	SC3	8	3	3	1	1	4	4	3	8	ND	-	-	-	-	-	-	-	-	-	-	-	-	-	-	-	-	-	+	-	-	-	-	-	-	-	+	-	-
01040-19-S026	PRJDB15501	SAMD00590908	DRR456315	2020-05-11	female	82y	blood	device-related infection	East Japan	Hokkaido	SC1	1	1	1	1	1	1	1	1	1	ND	IVa	-	+	-	-	-	-	-	-	+	-	-	+	-	-	-	-	-	+	-	-	-	-	-	-	+	-	-
01040-19-S027	PRJDB15501	SAMD00590909	DRR456316	2020-06-06	male	55y	blood	bone infection	East Japan	Hokkaido	SC4	15	13	13	1	1	12	11	13	15	t084	-	-	-	-	-	-	-	-	-	-	-	-	-	-	-	-	-	-	-	-	-	-	-	-	-	+	-	-
01040-19-S028	PRJDB15501	SAMD00590910	DRR456317	2020-06-06	male	54y	blood	bone infection	East Japan	Hokkaido	SC3	8	3	3	1	1	4	4	3	8	t008	IVa	I	-	-	-	-	-	-	-	-	-	-	+	-	-	-	-	-	+	-	-	-	-	-	-	+	-	-
01088-19-S001	PRJDB15501	SAMD00590911	DRR456318	2019-10-29	male	56y	blood	urinary-tract infection	East Japan	Hokkaido	SC5	20	4	9	1	8	1	10	8	20	t2094	-	-	-	-	-	-	-	-	+	-	+	-	-	-	+	+	+	-	-	-	-	-	-	-	-	+	+	-
01088-19-S002	PRJDB15501	SAMD00590912	DRR456319	2019-11-22	female	47y	blood	device-related infection	East Japan	Hokkaido	SC4	7467	13	13	58	1	12	11	13	15	t3345	-	-	-	-	-	-	-	-	-	-	-	-	-	-	-	-	-	-	-	-	-	-	-	-	-	+	-	-
01088-19-S005	PRJDB15501	SAMD00590913	DRR456320	2020-01-06	male	63y	blood	device-related infection	East Japan	Hokkaido	SC2	188	3	1	1	8	1	1	1	188	t189	-	-	-	-	-	-	-	-	-	-	-	-	-	-	-	-	-	-	-	-	-	-	-	-	-	+	-	-
01088-19-S006	PRJDB15501	SAMD00590914	DRR456321	2020-01-29	male	83y	blood	device-related infection	East Japan	Hokkaido	SC2	188	3	1	1	8	1	1	1	188	t8914	-	-	-	-	-	-	-	-	-	-	-	-	-	-	-	-	-	-	-	-	-	-	-	-	-	+	-	-
01088-19-S008	PRJDB15501	SAMD00590915	DRR456322	2020-05-29	male	72y	blood	device-related infection	East Japan	Hokkaido	SC5	20	4	9	1	8	1	10	8	20	t3277	-	-	-	-	-	-	-	-	+	-	-	-	-	-	+	+	+	-	-	-	-	-	-	-	-	+	+	-
08024-19-S001	PRJDB15501	SAMD00590916	DRR456323	2019-10-04	male	85y	blood	bone infection	East Japan	Ibaragi	SC1	81	1	1	1	9	1	1	1	81	t127	-	-	+	+	-	-	-	-	-	+	-	-	+	-	-	-	-	-	+	-	-	-	-	-	-	+	-	-
08024-19-S002	PRJDB15501	SAMD00590917	DRR456324	2019-10-04	male	66y	blood	urinary-tract infection	East Japan	Ibaragi	SC1	1	1	1	1	1	1	1	1	1	t1784	IVa	-	+	-	-	-	-	-	-	+	-	-	+	-	-	-	-	-	+	-	-	-	-	-	-	+	-	-
08024-19-S003	PRJDB15501	SAMD00590918	DRR456325	2019-10-26	female	88y	blood	unknown	East Japan	Ibaragi	SC6	97	3	1	1	1	1	5	3	97	t359	-	-	-	-	-	-	-	-	-	-	-	-	-	-	-	-	-	-	-	-	-	-	-	-	-	+	-	-
08024-19-S004	PRJDB15501	SAMD00590919	DRR456326	2020-01-06	male	89y	blood	urinary-tract infection	East Japan	Ibaragi	SC10	30	2	2	2	2	6	3	2	30	t3732	-	-	-	-	-	-	-	+	+	-	+	-	-	-	+	-	+	-	-	-	-	-	+	-	+	-	-	-
08024-19-S005	PRJDB15501	SAMD00590920	DRR456327	2020-02-03	male	73y	blood	unknown	East Japan	Ibaragi	SC6	97	3	1	1	1	1	5	3	97	t267	-	-	-	-	-	-	-	-	-	-	-	-	-	-	-	-	-	-	-	-	-	-	-	-	-	+	-	-
08024-19-S006	PRJDB15501	SAMD00590921	DRR456328	2020-02-21	male	64y	blood	unknown	East Japan	Ibaragi	SC1	1	1	1	1	1	1	1	1	1	t1784	IVa	-	+	-	-	-	-	-	-	+	-	-	+	-	-	-	-	-	+	-	-	-	-	-	-	+	-	-
08024-19-S007	PRJDB15501	SAMD00590922	DRR456329	2020-03-02	male	69y	blood	unknown	East Japan	Ibaragi	SC3	7468	3	3	920	1	4	4	3	8	t1767	I	-	-	-	-	-	-	-	-	-	-	-	-	-	-	-	-	+	-	-	-	-	-	-	-	+	-	-
08024-19-S008	PRJDB15501	SAMD00590923	DRR456330	2020-03-18	female	72y	blood	device-related infection	East Japan	Ibaragi	SC1	1	1	1	1	1	1	1	1	1	t1784	IVa	-	+	-	-	-	-	-	-	+	-	-	+	-	-	-	-	-	+	-	-	-	-	-	-	+	-	-
08026-19-S002	PRJDB15501	SAMD00590924	DRR456331	2019-10-28	male	73y	blood	device-related infection	East Japan	Ibaragi	SC1	1	1	1	1	1	1	1	1	1	t1784	IVa	-	+	-	-	-	-	-	-	+	-	-	+	-	-	-	-	-	+	-	-	-	-	-	-	+	-	-
08026-19-S005	PRJDB15501	SAMD00590925	DRR456332	2019-11-09	male	79ｙ	blood	pneumonia	East Japan	Ibaragi	SC9	45	10	14	8	6	10	3	2	45	t282	-	-	-	-	-	-	-	-	+	-	-	-	-	-	+	-	-	-	-	-	-	-	-	-	+	+	-	-
08026-19-S008	PRJDB15501	SAMD00590926	DRR456333	2019-11-10	male	45ｙ	blood	device-related infection	East Japan	Ibaragi	SC3	8	3	3	1	1	4	4	3	8	ND	-	-	-	-	+	-	-	+	-	-	-	-	-	+	-	-	-	-	-	-	-	-	-	-	-	+	-	-
08026-19-S009	PRJDB15501	SAMD00590927	DRR456334	2019-11-12	female	81ｙ	blood	pneumonia	East Japan	Ibaragi	SC3	7469	876	3	1	1	4	4	3	8	t1767	-	-	-	-	-	-	-	-	-	-	-	-	-	-	-	-	-	-	-	-	-	-	-	-	-	+	-	-
08026-19-S010	PRJDB15501	SAMD00590928	DRR456335	2019-11-24	male	69ｙ	blood	urinary-tract infection	East Japan	Ibaragi	SC7	672	4	3	1	1	11	72	11	672	ND	-	-	-	-	+	-	-	-	+	-	+	-	-	+	+	+	+	-	-	-	-	-	-	-	-	+	-	-
08026-19-S012	PRJDB15501	SAMD00590929	DRR456336	2019-12-13	male	68ｙ	blood	device-related infection	East Japan	Ibaragi	SC1	1	1	1	1	1	1	1	1	1	t1784	IVa	-	-	-	-	-	-	-	-	+	-	-	-	-	-	-	-	-	-	-	-	-	-	-	-	+	-	-
08026-19-S014	PRJDB15501	SAMD00590930	DRR456337	2019-12-23	male	89ｙ	blood	pneumonia	East Japan	Ibaragi	SC1	1	1	1	1	1	1	1	1	1	t4494	IVa	-	+	-	-	-	-	-	-	+	-	-	+	-	-	-	-	-	+	-	-	-	-	-	-	+	-	-
08026-19-S015	PRJDB15501	SAMD00590931	DRR456338	2020-02-10	female	90ｙ	blood	urinary-tract infection	East Japan	Ibaragi	SC1	1	1	1	1	1	1	1	1	1	t1784	IVa	-	+	-	-	-	-	-	-	+	-	-	+	-	-	-	-	-	+	-	-	-	-	-	-	+	-	-
08026-19-S017	PRJDB15501	SAMD00590932	DRR456339	2020-03-11	female	52ｙ	blood	unknown	East Japan	Ibaragi	SC2	188	3	1	1	8	1	1	1	188	t189	-	-	-	-	-	-	-	-	-	.	-	-	-	-	-	-	-	-	-	-	-	-	-	-	-	+	-	-
08026-19-S019	PRJDB15501	SAMD00590933	DRR456340	2020-03-17	male	71ｙ	blood	device-related infection	East Japan	Ibaragi	SC1	1	1	1	1	1	1	1	1	1	t4494	IVa	-	+	-	-	-	-	-	-	+	-	-	-	-	-	-	-	-	+	-	-	-	-	-	-	+	-	-
08026-19-S022	PRJDB15501	SAMD00590934	DRR456341	2020-04-02	female	87ｙ	blood	infectious endocarditis	East Japan	Ibaragi	SC1	1	1	1	1	1	1	1	1	1	t1784	IVa	-	.	-	-	-	-	-	-	+	-	-	-	-	-	-	-	-	-	-	-	-	-	-	-	+	-	-
08026-19-S035	PRJDB15501	SAMD00590935	DRR456342	2020-05-12	male	83ｙ	blood	unknown	East Japan	Ibaragi	SC1	1	1	1	1	1	1	1	1	1	t1784	IVa	-	+	-	-	-	-	-	-	+	-	-	+	-	-	-	-	-	+	-	-	-	-	-	-	+	-	-
08026-19-S039	PRJDB15501	SAMD00590936	DRR456343	2020-05-14	male	83ｙ	blood	pneumonia	East Japan	Ibaragi	SC1	1	1	1	1	1	1	1	1	1	t1784	IVa	-	+	-	-	-	-	-	-	+	-	-	+	-	-	-	-	-	+	-	-	-	-	-	-	+	-	-
08026-19-S040	PRJDB15501	SAMD00590937	DRR456344	2020-05-19	female	74ｙ	blood	pneumonia	East Japan	Ibaragi	SC6	97	3	1	1	1	1	5	3	97	t359	-	-	-	-	-	-	-	-	-	-	-	-	-	-	-	-	-	-	-	-	-	-	-	-	-	+	-	-
08026-19-S041	PRJDB15501	SAMD00590938	DRR456345, DRR457465	2020-05-26	male	40ｙ	blood	pneumonia	East Japan	Ibaragi	SC3	8	3	3	1	1	4	4	3	8	t1767	IV	-	-	-	+	-	-	+	-	-	-	-	-	-	-	-	-	+	-	-	-	-	-	-	-	+	-	-
08026-19-S043	PRJDB15501	SAMD00590939	DRR456346	2020-06-01	male	83ｙ	blood	urinary-tract infection	East Japan	Ibaragi	SC1	1	1	1	1	1	1	1	1	1	t1784	IVa	-	+	-	-	-	-	-	-	+	-	-	+	-	-	-	-	-	+	-	-	-	-	-	-	+	-	-
08026-19-S045	PRJDB15501	SAMD00590940	DRR456347	2020-06-13	male	79ｙ	blood	skin and soft tissue infection	East Japan	Ibaragi	SC1	1	1	1	1	1	1	1	1	1	t1784	IVa	-	+	-	-	-	-	-	-	+	-	-	+	-	-	-	-	-	+	-	-	-	-	-	-	+	-	-
08026-19-S047	PRJDB15501	SAMD00590941	DRR456348, DRR457466	2020-06-23	female	56ｙ	blood	bone infection	East Japan	Ibaragi	SC7	25	4	1	4	1	5	5	4	25	t436	-	-	-	-	-	-	-	-	+	-	+	-	-	-	+	+	+	-	-	-	-	-	-	-	+	+	-	-
08026-19-S050	PRJDB15501	SAMD00590942	DRR456349	2020-06-25	male	51ｙ	blood	unknown	East Japan	Ibaragi	SC2	188	3	1	1	8	1	1	1	188	t189	-	-	-	-	-	-	-	-	-	-	-	-	-	-	-	-	-	-	-	-	-	-	-	-	-	+	-	-
10019-19-S001	PRJDB15501	SAMD00590943	DRR456350	2019-04-01	female	85y	blood	pneumonia	East Japan	Gunma	SC6	97	3	1	1	1	1	5	3	97	t224	-	-	-	-	-	-	-	-	-	-	-	-	-	-	-	-	-	-	-	-	-	-	-	-	-	+	-	-
10019-19-S002	PRJDB15501	SAMD00590944	DRR456351, DRR457467	2019-04-16	female	31ｙ	blood	unknown	East Japan	Gunma	SC7	2867	1	152	1	8	1	5	11	12	t2016	-	-	-	-	-	-	-	-	-	-	-	-	-	-	-	-	-	-	-	-	-	-	-	-	-	+	-	-
10019-19-S003	PRJDB15501	SAMD00590945	DRR456352	2019-05-04	male	64y	blood	others	East Japan	Gunma	SC1	1	1	1	1	1	1	1	1	1	t4494	IVa	-	+	-	-	-	-	-	-	+	-	-	+	-	-	-	-	-	+	-	-	-	-	-	-	+	-	-
10019-19-S004	PRJDB15501	SAMD00590946	DRR456353	2019-05-09	male	84ｙ	blood	unknown	East Japan	Gunma	SC3	8	3	3	1	1	4	4	3	8	t1767	IVj	-	-	-	-	-	-	-	-	-	-	-	-	-	-	-	-	+	-	-	-	-	-	-	-	+	-	-
10019-19-S005	PRJDB15501	SAMD00590947	DRR456354	2019-05-30	female	84ｙ	blood	pneumonia	East Japan	Gunma	SC4	15	13	13	1	1	12	11	13	15	t368	-	-	-	-	-	-	-	-	-	-	-	-	-	-	-	-	-	-	-	-	-	-	-	-	-	+	-	-
10019-19-S006	PRJDB15501	SAMD00590948	DRR456355	2019-06-14	female	94ｙ	blood	pneumonia	East Japan	Gunma	SC9	508	10	40	8	6	10	3	2	508	ND	-	-	-	-	-	-	-	-	+	-	-	-	-	-	+	+	+	-	-	-	-	-	-	-	+	+	-	-
10019-19-S007	PRJDB15501	SAMD00590949	DRR456356	2019-07-15	male	51y	blood	urinary-tract infection	East Japan	Gunma	SC5	7470	4	9	625	8	1	10	8	20	t4304	-	-	-	-	-	-	-	-	+	-	+	-	-	-	+	+	+	-	-	-	-	-	-	-	-	+	+	-
10019-19-S008	PRJDB15501	SAMD00590950	DRR456357	2019-07-22	male	83y	blood	skin and soft tissue infection	East Japan	Gunma	SC3	8	3	3	1	1	4	4	3	8	t11474	-	-	-	-	-	-	-	-	-	-	-	-	-	-	-	-	-	+	-	-	-	-	-	-	-	+	-	-
10019-19-S009	PRJDB15501	SAMD00590951	DRR456358	2019-07-23	male	9m	blood	skin and soft tissue infection	East Japan	Gunma	SC4	15	13	13	1	1	12	11	13	15	t085	-	-	-	-	-	-	-	-	-	-	-	-	-	-	-	-	-	-	-	-	-	-	-	-	-	+	-	-
10019-19-S010	PRJDB15501	SAMD00590952	DRR456359	2019-07-25	male	37ｙ	blood	skin and soft tissue infection	East Japan	Gunma	SC1	1	1	1	1	1	1	1	1	1	t4175	IVa	-	+	-	-	-	-	-	-	+	-	-	+	-	-	-	-	-	+	-	-	-	-	-	-	+	-	-
10019-19-S011	PRJDB15501	SAMD00590953	DRR456360	2019-08-07	male	1y	blood	pneumonia	East Japan	Gunma	SC3	8	3	3	1	1	4	4	3	8	t1767	IVl	-	-	-	+	-	-	+	-	-	-	-	-	+	-	-	-	+	-	-	-	-	-	-	-	+	-	-
10019-19-S012	PRJDB15501	SAMD00590954	DRR456361	2019-08-10	female	78y	blood	pneumonia	East Japan	Gunma	SC3	8	3	3	1	1	4	4	3	8	t5160	-	-	-	-	-	-	-	-	-	-	-	-	-	-	-	-	-	-	-	-	-	-	-	-	-	+	-	-
10019-19-S013	PRJDB15501	SAMD00590955	DRR456362	2019-09-10	male	85y	blood	unknown	East Japan	Gunma	SC8	5	1	4	1	4	12	1	10	5	t548	-	-	-	-	-	-	-	-	+	-	+	-	-	-	+	+	+	+	-	-	-	-	-	-	-	+	-	-
10019-19-S014	PRJDB15501	SAMD00590956	DRR456363, DRR457468	2019-09-11	male	80ｙ	blood	pneumonia	East Japan	Gunma	SC8	764	1	136	1	4	12	1	10	5	t002	IIa	II	-	+	-	-	-	-	+	-	+	-	-	-	+	+	+	-	-	-	-	-	-	-	-	+	-	-
10019-19-S015	PRJDB15501	SAMD00590957	DRR456364	2019-09-17	male	6m	blood	device-related infection	East Japan	Gunma	SC5	20	4	9	1	8	1	10	8	20	t1987	-	-	-	-	-	-	-	-	+	-	+	-	-	-	+	+	+	-	-	-	-	-	-	-	-	+	+	-
10019-19-S016	PRJDB15501	SAMD00590958	DRR456365, DRR546375	2019-10-10	male	81ｙ	blood	device-related infection	East Japan	Gunma	SC8	764	1	136	1	4	12	1	10	5	t002	IIa	-	-	+	-	-	-	-	+	-	-	-	-	-	-	-	-	-	-	-	-	-	-	-	-	+	-	-
10019-19-S017	PRJDB15501	SAMD00590959	DRR456366	2019-10-28	female	78y	blood	device-related infection	East Japan	Gunma	SC12	121	6	5	6	2	7	14	5	121	t5072	-	-	-	-	-	-	-	-	+	-	+	-	-	-	+	+	+	-	-	-	-	-	+	-	-	+	+	+
10019-19-S018	PRJDB15501	SAMD00590960	DRR456367	2019-10-13	male	76ｙ	blood	pneumonia	East Japan	Gunma	SC4	15	13	13	1	1	12	11	13	15	t346	-	-	-	-	-	-	-	-	-	-	-	-	-	-	-	-	-	-	-	-	-	-	-	-	-	+	-	-
10019-19-S019	PRJDB15501	SAMD00590961	DRR456368	2019-10-22	male	67ｙ	blood	unknown	East Japan	Gunma	SC4	15	13	13	1	1	12	11	13	15	t084	-	-	-	-	-	-	-	-	-	-	-	-	-	-	-	-	-	-	-	-	-	-	-	-	-	+	-	-
10019-19-S020	PRJDB15501	SAMD00590962	DRR456369	2019-11-06	female	87ｙ	blood	pneumonia	East Japan	Gunma	SC2	188	3	1	1	8	1	1	1	188	t189	-	-	-	-	-	-	-	-	-	-	-	-	-	-	-	-	-	-	-	-	-	-	-	-	-	+	-	-
10019-19-S021	PRJDB15501	SAMD00590963	DRR456370, DRR546376	2019-11-06	female	80ｙ	blood	skin and soft tissue infection	East Japan	Gunma	SC8	764	1	136	1	4	12	1	10	5	t002	IIa	II	-	+	-	-	-	-	+	-	-	-	-	-	+	+	-	-	-	-	-	-	-	-	-	+	-	-
10019-19-S023	PRJDB15501	SAMD00590964	DRR456371	2019-11-12	male	67ｙ	blood	others	East Japan	Gunma	SC1	1	1	1	1	1	1	1	1	1	t127	-	-	+	-	-	-	-	-	-	+	-	-	+	-	-	-	-	-	+	-	-	-	-	-	-	+	-	-
10019-19-S024	PRJDB15501	SAMD00590965	DRR456372	2019-12-02	male	11m	blood	device-related infection	East Japan	Gunma	SC10	30	2	2	2	2	6	3	2	30	t012	-	-	+	-	-	-	-	+	+	-	+	-	-	-	+	+	+	-	-	-	-	-	+	-	+	-	-	-
10019-19-S025	PRJDB15501	SAMD00590966	DRR456373	2019-12-12	female	80ｙ	blood	bone infection	East Japan	Gunma	SC2	188	3	1	1	8	1	1	1	188	t6586	-	-	-	-	-	-	-	-	-	-	-	-	-	-	-	-	-	-	-	-	-	-	-	-	-	+	-	-
10019-19-S027	PRJDB15501	SAMD00590967	DRR456374, DRR457469	2020-01-09	male	53ｙ	blood	bone infection	East Japan	Gunma	SC3	630	12	3	1	1	4	4	3	8	t377	-	-	-	-	-	-	-	-	-	-	-	-	-	-	-	-	-	-	-	-	-	-	-	-	-	+	-	-
10019-19-S028	PRJDB15501	SAMD00590968	DRR456375	2020-02-02	female	86y	blood	urinary-tract infection	East Japan	Gunma	SC5	20	4	9	1	8	1	10	8	20	t3277	-	-	-	-	-	-	-	-	+	-	+	-	-	-	+	+	+	-	-	-	-	-	-	-	-	+	+	-
10019-19-S029	PRJDB15501	SAMD00590969	DRR456376	2020-02-06	male	95ｙ	blood	pneumonia	East Japan	Gunma	SC1	1	1	1	1	1	1	1	1	1	t1784	IVa	-	-	-	-	-	-	-	-	+	-	-	-	-	-	-	-	-	-	-	-	-	-	-	-	+	-	-
10019-19-S030	PRJDB15501	SAMD00590970	DRR456377	2020-03-02	male	62ｙ	blood	device-related infection	East Japan	Gunma	SC1	1	1	1	1	1	1	1	1	1	t4494	IVa	-	+	-	-	-	-	-	-	+	-	-	+	-	-	-	-	-	+	-	-	-	-	-	-	+	-	-
10019-19-S031	PRJDB15501	SAMD00590971	DRR456378	2020-03-09	male	81ｙ	blood	device-related infection	East Japan	Gunma	SC4	15	13	13	1	1	12	11	13	15	t084	-	-	-	-	-	-	-	-	-	-	-	-	-	-	-	-	-	-	-	-	-	-	-	-	-	+	-	-
10019-19-S032	PRJDB15501	SAMD00590972	DRR456379	2020-04-04	male	67y	blood	pneumonia	East Japan	Gunma	SC8	5	1	4	1	4	12	1	10	5	t179	-	-	-	-	-	+	-	-	+	-	+	+	-	-	+	+	+	+	-	+	-	-	-	-	-	+	-	-
10019-19-S033	PRJDB15501	SAMD00590973	DRR456380	2020-04-07	male	72ｙ	blood	bone infection	East Japan	Gunma	SC6	97	3	1	1	1	1	5	3	97	t11461	-	-	-	-	-	-	-	-	-	-	-	-	-	-	-	-	-	-	-	-	-	-	-	-	-	+	-	-
10019-19-S034	PRJDB15501	SAMD00590974	DRR456381, DRR546377	2020-04-12	female	84ｙ	blood	unknown	East Japan	Gunma	SC8	764	1	136	1	4	12	1	10	5	t010	IIa	-	-	+	-	-	-	-	+	-	+	-	-	-	+	+	+	-	-	-	-	-	-	-	-	+	-	-
10019-19-S036	PRJDB15501	SAMD00590975	DRR456382	2020-04-17	male	69ｙ	blood	bone infection	East Japan	Gunma	SC13	59	19	23	15	2	19	20	15	59	t316	-	-	-	-	-	-	-	-	-	-	-	-	-	-	-	-	-	-	-	-	-	-	-	-	-	+	+	-
10019-19-S037	PRJDB15501	SAMD00590976	DRR456383	2020-04-27	female	75ｙ	blood	unknown	East Japan	Gunma	SC9	508	10	40	8	6	10	3	2	508	t050	-	-	-	+	-	-	-	-	+	-	+	-	-	-	+	-	+	-	-	-	-	-	-	-	+	+	-	-
10019-19-S039	PRJDB15501	SAMD00590977	DRR456384	2020-05-19	female	82y	blood	bone infection	East Japan	Gunma	SC8	5	1	4	1	4	12	1	10	5	t548	-	-	-	-	-	-	-	-	+	-	+	-	-	-	+	+	+	+	-	-	-	-	-	-	-	+	-	-
10019-19-S040	PRJDB15501	SAMD00590978	DRR456385	2020-06-05	male	69ｙ	blood	unknown	East Japan	Gunma	SC7	7	5	4	1	4	4	6	3	7	t9023	-	-	-	-	-	-	-	-	-	-	-	-	-	-	-	-	-	-	-	-	-	-	-	-	-	+	-	-
10019-19-S041	PRJDB15501	SAMD00590979	DRR456386	2020-06-06	male	39ｙ	blood	pneumonia	East Japan	Gunma	SC3	8	3	3	1	1	4	4	3	8	t118	-	-	-	-	-	-	-	-	-	-	-	-	-	-	-	-	-	+	-	-	-	-	-	-	-	+	-	-
10019-19-S042	PRJDB15501	SAMD00590980	DRR456387	2020-06-13	male	22ｄ	blood	bone infection	East Japan	Gunma	SC3	8	3	3	1	1	4	4	3	8	t986	IVl	-	-	-	+	-	-	+	-	-	-	-	-	+	-	-	-	+	-	-	-	-	-	-	-	+	-	-
10019-19-S043	PRJDB15501	SAMD00590981	DRR456388	2020-06-11	male	83y	blood	infectious endocarditis	East Japan	Gunma	SC6	834	3	124	1	1	1	1	40	834	ND	IVa	-	-	-	-	-	-	+	-	-	-	-	-	+	-	-	-	-	-	-	-	-	-	-	-	+	-	-
10019-19-S044	PRJDB15501	SAMD00590982	DRR456389	2020-06-18	male	81ｙ	blood	unknown	East Japan	Gunma	SC1	1	1	1	1	1	1	1	1	1	t1784	IVa	-	+	-	-	-	-	-	-	+	-	-	+	-	-	-	-	-	+	-	-	-	-	-	-	+	-	-
10019-19-S046	PRJDB15501	SAMD00590983	DRR456390	2020-06-11	female	1m	blood	bone infection	East Japan	Gunma	SC2	7471	877	1	1	8	528	1	1	188	t189	-	-	-	-	-	-	-	-	-	-	-	-	-	-	-	-	-	-	-	-	-	-	-	-	-	+	-	-
10019-19-S048	PRJDB15501	SAMD00590984	DRR456391	2020-06-30	female	76y	blood	others	East Japan	Gunma	SC3	8	3	3	1	1	4	4	3	8	t1767	V	-	+	-	-	-	-	-	-	-	-	-	-	-	-	-	-	-	-	-	-	-	-	-	-	+	-	-
10021-19-S001	PRJDB15501	SAMD00590985	DRR456392, DRR457470	2020-03-28	male	72y	blood	urinary-tract infection	East Japan	Gunma	SC3	7472	12	3	1	1	4	4	1	8	t377	ND	-	-	-	-	-	-	-	-	-	-	-	-	-	-	-	-	-	-	-	-	-	-	-	-	+	-	-
10021-19-S002	PRJDB15501	SAMD00590986	DRR456393	2020-04-09	male	83y	blood	device-related infection	East Japan	Gunma	SC1	1	1	1	1	1	1	1	1	1	t1784	IVa	-	+	-	-	-	-	-	-	+	-	-	+	-	-	-	-	-	+	-	-	-	-	-	-	+	-	-
10021-19-S003	PRJDB15501	SAMD00590987	DRR456394	2020-04-28	female	63y	blood	others	East Japan	Gunma	SC11	398	3	35	19	2	20	26	39	398	t1451	-	-	-	-	-	-	-	-	-	-	-	-	-	-	-	-	-	-	-	-	-	-	-	-	-	-	-	-
10021-19-S004	PRJDB15501	SAMD00590988	DRR456395	2020-05-13	male	84y	blood	unknown	East Japan	Gunma	SC3	8	3	3	1	1	4	4	3	8	t4908	IVj	-	-	-	-	-	-	-	-	-	-	-	-	-	-	-	-	+	-	-	-	-	-	-	-	+	-	-
12004-19-S001	PRJDB15501	SAMD00590989	DRR456396	2019-10-29	female	90y	blood	urinary-tract infection	East Japan	Chiba	SC3	8	3	3	1	1	4	4	3	8	t008	IVa	I	-	-	-	-	-	-	-	-	-	-	+	-	-	-	-	-	+	-	-	-	-	-	-	+	-	-
12004-19-S002	PRJDB15501	SAMD00590990	DRR456397, DRR457471	2019-11-05	female	50ｙ	blood	intra-abdominal infection	East Japan	Chiba	SC11	398	3	35	19	2	20	26	39	398	t2876	-	-	-	-	-	-	-	-	-	-	-	-	-	-	-	-	-	-	-	-	-	-	-	-	-	-	-	-
12004-19-S003	PRJDB15501	SAMD00590991	DRR456398	2019-11-06	male	71y	blood	unknown	East Japan	Chiba	SC11	398	3	35	19	2	20	26	39	398	t1451	-	-	-	-	-	-	-	-	-	-	-	-	-	-	-	-	-	-	-	-	-	-	-	-	-	-	-	-
12004-19-S004	PRJDB15501	SAMD00590992	DRR456399	2019-12-22	male	81y	blood	unknown	East Japan	Chiba	SC7	12	1	3	1	8	11	5	11	12	t561	-	-	-	+	-	-	-	-	-	-	-	-	-	-	-	-	-	+	-	-	-	-	-	-	-	+	-	+
12004-19-S005	PRJDB15501	SAMD00590993	DRR456400	2019-12-30	male	85ｙ	blood	unknown	East Japan	Chiba	SC10	30	2	2	2	2	6	3	2	30	t018	-	-	+	-	-	-	-	+	+	-	+	-	-	-	+	+	+	-	-	-	-	-	+	-	+	-	-	-
12004-19-S006	PRJDB15501	SAMD00590994	DRR456401	2020-01-16	male	97y	blood	bone infection	East Japan	Chiba	SC1	2764	1	1	346	1	1	1	1	1	t1784	IVa	-	+	-	-	-	-	-	-	+	-	-	+	-	-	-	-	-	+	-	-	-	-	-	-	+	-	-
12004-19-S007	PRJDB15501	SAMD00590995	DRR456402	2020-03-02	male	48ｙ	blood	skin and soft tissue infection	East Japan	Chiba	SC1	1	1	1	1	1	1	1	1	1	t4494	-	-	+	-	-	-	-	-	-	+	-	-	+	-	-	-	-	-	+	-	-	-	-	-	-	+	-	-
12004-19-S008	PRJDB15501	SAMD00590996	DRR456403	2020-03-12	female	82y	blood	skin and soft tissue infection	East Japan	Chiba	SC12	121	6	5	6	2	7	14	5	121	t3025	-	-	-	-	-	-	-	-	+	-	+	-	-	-	+	+	+	-	-	-	-	-	+	-	-	+	+	+
12004-19-S009	PRJDB15501	SAMD00590997	DRR456404	2020-03-23	male	69y	blood	unknown	East Japan	Chiba	SC7	72	1	4	1	8	4	4	3	72	t11108	-	-	-	-	+	-	-	-	+	-	+	-	-	+	+	+	+	-	-	-	-	-	-	-	+	+	-	-
12004-19-S010	PRJDB15501	SAMD00590998	DRR456405	2020-04-21	female	89y	blood	unknown	East Japan	Chiba	SC1	2764	1	1	346	1	1	1	1	1	t1784	IVa	-	+	-	-	-	-	-	-	+	-	-	+	-	-	-	-	-	+	-	-	-	-	-	-	+	-	-
12004-19-S012	PRJDB15501	SAMD00590999	DRR456406	2020-06-18	female	82y	blood	pneumonia	East Japan	Chiba	SC1	1	1	1	1	1	1	1	1	1	t1784	IVa	-	+	-	-	-	-	-	-	+	-	-	+	-	-	-	-	-	+	-	-	-	-	-	-	+	-	-
12023-19-S001	PRJDB15501	SAMD00591000	DRR456407	2019-10-04	female	76y	blood	bone infection	East Japan	Chiba	SC7	7	5	4	1	4	4	6	3	7	t091	-	-	+	-	-	-	-	-	-	-	-	-	-	-	-	-	-	-	-	-	-	-	-	-	-	+	-	-
12023-19-S002	PRJDB15501	SAMD00591001	DRR456408	2019-10-01	female	77y	blood	skin and soft tissue infection	East Japan	Chiba	SC8	5	1	4	1	4	12	1	10	5	t1345	-	-	-	-	-	-	-	-	+	-	+	-	-	-	+	+	+	+	-	-	-	-	-	-	-	+	-	-
12023-19-S003	PRJDB15501	SAMD00591002	DRR456409	2020-04-13	male	68y	blood	bone infection	East Japan	Chiba	SC1	1	1	1	1	1	1	1	1	1	t1784	IVa	-	+	-	-	-	-	-	-	+	-	-	+	-	-	-	-	-	+	-	-	-	-	-	-	+	-	-
12023-19-S007	PRJDB15501	SAMD00591003	DRR456410	2020-05-18	male	69y	blood	device-related infection	East Japan	Chiba	SC8	5	1	4	1	4	12	1	10	5	t002	IIa	-	-	-	+	-	-	+	+	-	+	-	-	+	+	+	+	+	-	-	-	-	-	-	-	+	-	-
13008-19-S001	PRJDB15501	SAMD00591004	DRR456411	2019-09-16	female	88y	blood	unknown	East Japan	Tokyo	SC6	7473	6	1	1	1	1	5	3	97	t13066	-	-	-	-	-	-	-	-	-	-	-	-	-	-	-	-	-	-	-	-	-	-	-	-	-	+	-	-
13008-19-S002	PRJDB15501	SAMD00591005	DRR456412	2019-09-17	female	88y	blood	unknown	East Japan	Tokyo	SC9	7474	10	14	8	6	10	3	991	45	t330	-	-	-	-	-	-	-	-	+	-	+	-	-	-	+	+	+	-	-	-	-	-	-	-	+	+	-	-
13008-19-S003	PRJDB15501	SAMD00591006	DRR456413	2020-01-16	female	81ｙ	blood	skin and soft tissue infection	East Japan	Tokyo	SC3	8	3	3	1	1	4	4	3	8	t211	-	-	+	-	-	-	-	-	-	-	-	-	-	-	-	-	-	-	-	-	-	-	-	-	-	+	-	-
13008-19-S004	PRJDB15501	SAMD00591007	DRR456414, DRR457472	2020-03-10	male	85y	blood	pneumonia	East Japan	Tokyo	SC8	5	1	4	1	4	12	1	10	5	ND	I	-	-	+	-	-	-	-	+	-	+	-	+	-	+	+	+	+	+	-	-	-	-	-	-	+	-	-
15017-19-S002	PRJDB15501	SAMD00591008	DRR456415	2019-10-18	male	92y	blood	unknown	East Japan	Niigata	SC3	8	3	3	1	1	4	4	3	8	ND	-	-	+	-	-	-	-	-	-	-	-	-	-	-	-	-	-	-	-	-	-	-	-	-	-	+	-	-
15017-19-S004	PRJDB15501	SAMD00591009	DRR456416	2019-10-26	male	72y	blood	unknown	East Japan	Niigata	SC1	7475	1	1	917	1	1	1	1	1	t1784	IVa	-	+	-	-	-	-	-	-	+	-	-	+	-	-	-	-	-	+	-	-	-	-	-	-	+	-	-
15017-19-S005	PRJDB15501	SAMD00591010	DRR456417	2019-11-11	female	93y	blood	unknown	East Japan	Niigata	SC8	7476	1	4	1	4	12	1	992	5	t002	IIa	-	-	-	-	-	-	+	+	-	+	-	-	-	+	+	+	-	-	-	-	-	-	-	-	+	-	-
15017-19-S006	PRJDB15501	SAMD00591011	DRR456418	2019-12-03	female	93y	blood	unknown	East Japan	Niigata	SC8	7476	1	4	1	4	12	1	992	5	t002	IIa	-	-	-	-	-	-	+	+	-	-	-	-	-	+	-	+	-	-	-	-	-	-	-	-	+	-	-
15017-19-S007	PRJDB15501	SAMD00591012	DRR456419	2020-01-07	male	75y	blood	unknown	East Japan	Niigata	SC1	81	1	1	1	9	1	1	1	81	t127	IVg	-	-	+	-	-	-	-	-	+	-	-	-	-	-	-	-	-	-	-	-	-	-	-	-	+	-	-
15017-19-S008	PRJDB15501	SAMD00591013	DRR456420, DRR457473	2020-02-20	male	8y	blood	unknown	East Japan	Niigata		1443	1	26	28	18	18	33	156	89	t525	-	-	-	-	-	-	-	-	-	-	-	-	-	-	+	-	+	-	-	-	-	-	-	-	-	+	-	+
15017-19-S009	PRJDB15501	SAMD00591014	DRR456421	2020-02-23	male	84y	blood	unknown	East Japan	Niigata	SC1	81	1	1	1	9	1	1	1	81	t127	IVg	-	+	+	-	-	-	-	-	+	-	-	+	-	-	-	-	-	+	-	-	-	-	-	-	+	-	-
15017-19-S010	PRJDB15501	SAMD00591015	DRR456422	2020-04-02	male	83y	blood	unknown	East Japan	Niigata	SC1	81	1	1	1	9	1	1	1	81	t127	IVg	-	-	+	-	-	-	-	-	+	-	-	-	-	-	-	-	-	-	-	-	-	-	-	-	+	-	-
15017-19-S012	PRJDB15501	SAMD00591016	DRR456423	2020-04-09	male	62y	blood	pneumonia	East Japan	Niigata	SC1	81	1	1	1	9	1	1	1	81	t127	IVg	-	-	+	-	-	-	-	-	+	-	-	-	-	-	-	-	-	-	-	-	-	-	-	-	+	-	-
15017-19-S014	PRJDB15501	SAMD00591017	DRR456424	2020-05-08	male	12y	blood	pneumonia	East Japan	Niigata	SC3	8	3	3	1	1	4	4	3	8	t818	-	-	-	-	+	-	-	-	-	-	-	-	-	+	-	-	-	+	-	-	-	-	-	-	-	+	-	-
15017-19-S015	PRJDB15501	SAMD00591018	DRR456425	2020-06-11	female	72y	blood	unknown	East Japan	Niigata	SC10	30	2	2	2	2	6	3	2	30	ND	-	-	-	-	-	-	-	+	+	-	+	-	-	-	+	+	+	-	-	-	-	-	+	-	+	-	-	-
15017-19-S016	PRJDB15501	SAMD00591019	DRR456426	2020-06-15	male	87y	blood	unknown	East Japan	Niigata	SC2	7477	3	1	1	581	1	1	1	188	t189	-	-	-	-	-	-	-	-	-	-	-	-	-	-	-	-	-	-	-	-	-	-	-	-	-	+	-	-
15017-19-S017	PRJDB15501	SAMD00591020	DRR456427	2020-07-07	male	81y	blood	unknown	East Japan	Niigata	SC8	5	1	4	1	4	12	1	10	5	t179	-	-	-	-	-	+	-	-	+	-	+	+	-	-	+	+	+	+	-	+	-	-	-	-	-	+	-	-
15029-19-S001	PRJDB15501	SAMD00591021	DRR456428	2020-04-20	female	34y	blood	unknown	East Japan	Niigata	SC1	2725	1	1	41	1	1	1	1	1	t3022	IVa	-	+	-	-	-	-	-	-	+	-	-	+	-	-	-	-	-	+	-	-	-	-	-	-	+	-	-
17005-19-S001	PRJDB15501	SAMD00591022	DRR456429	2019-10-19	female	92y	blood	urinary-tract infection	East Japan	Ishikawa	SC3	8	3	3	1	1	4	4	3	8	t5071	IVl	-	-	-	+	-	-	+	-	-	-	-	-	+	-	-	-	+	-	-	-	-	-	-	-	+	-	-
17005-19-S002	PRJDB15501	SAMD00591023	DRR456430	2019-10-23	female	92y	blood	bone infection	East Japan	Ishikawa	SC8	5	1	4	1	4	12	1	10	5	t1303	-	-	-	-	-	-	-	-	+	-	+	-	-	-	+	+	-	-	-	-	-	-	-	-	-	+	-	-
17005-19-S003	PRJDB15501	SAMD00591024	DRR456431	2019-10-24	male	76y	blood	unknown	East Japan	Ishikawa	SC1	1	1	1	1	1	1	1	1	1	t1784	IVa	-	+	-	-	-	-	-	-	+	-	-	+	-	-	-	-	-	+	-	-	-	-	-	-	+	-	-
17005-19-S004	PRJDB15501	SAMD00591025	DRR456432	2019-10-26	male	67y	blood	unknown	East Japan	Ishikawa	SC2	188	3	1	1	8	1	1	1	188	t189	.	-	-	-	-	-	-	-	-	-	-	-	-	-	-	-	-	-	-	-	-	-	-	-	-	+	-	-
17005-19-S005	PRJDB15501	SAMD00591026	DRR456433	2019-10-29	male	77y	blood	unknown	East Japan	Ishikawa	SC1	1	1	1	1	1	1	1	1	1	t1784	IVa	-	+	-	-	-	-	-	-	+	-	-	+	-	-	-	-	-	+	-	-	-	-	-	-	+	-	-
17005-19-S007	PRJDB15501	SAMD00591027	DRR456434	2019-11-16	male	90y	blood	device-related infection	East Japan	Ishikawa	SC1	1	1	1	1	1	1	1	1	1	t1784	IVa	-	+	-	-	-	-	-	-	+	-	-	+	-	-	-	-	-	+	-	-	-	-	-	-	+	-	-
17005-19-S008	PRJDB15501	SAMD00591028	DRR456435	2019-09-20	female	86ｙ	blood	unknown	East Japan	Ishikawa	SC1	1	1	1	1	1	1	1	1	1	t1784	IVa	-	-	-	-	-	-	-	-	+	-	-	-	-	-	-	-	-	-	-	-	-	-	-	-	+	-	-
17005-19-S009	PRJDB15501	SAMD00591029	DRR456436	2019-11-27	male	88ｙ	blood	unknown	East Japan	Ishikawa	SC4	15	13	13	1	1	12	11	13	15	t3345	-	-	-	-	-	-	-	-	-	-	-	-	-	-	-	-	-	-	-	-	-	-	-	-	-	+	-	-
17005-19-S010	PRJDB15501	SAMD00591030	DRR456437	2019-09-27	male	72y	blood	unknown	East Japan	Ishikawa	SC1	1	1	1	1	1	1	1	1	1	t3022	IVa	-	+	-	-	-	-	-	-	+	-	-	+	-	-	-	-	-	+	-	-	-	-	-	-	+	-	-
17005-19-S011	PRJDB15501	SAMD00591031	DRR456438	2019-12-09	male	37y	blood	intra-abdominal infection	East Japan	Ishikawa	SC1	1	1	1	1	1	1	1	1	1	t1784	IVa	-	+	-	-	-	-	-	-	+	-	-	+	-	-	-	-	-	+	-	-	-	-	-	-	+	-	-
17005-19-S012	PRJDB15501	SAMD00591032	DRR456439	2019-12-20	female	87y	blood	unknown	East Japan	Ishikawa	SC6	97	3	1	1	1	1	5	3	97	t267	-	-	-	-	-	-	-	-	-	-	-	-	-	-	-	-	-	-	-	-	-	-	-	-	-	+	-	-
17005-19-S014	PRJDB15501	SAMD00591033	DRR456440	2020-01-09	male	75ｙ	blood	unknown	East Japan	Ishikawa	SC2	188	3	1	1	8	1	1	1	188	t189	-	-	-	-	-	-	-	-	-	-	-	-	-	-	-	-	-	-	-	-	-	-	-	-	-	+	-	-
17005-19-S015	PRJDB15501	SAMD00591034	DRR456441	2020-01-09	male	90y	blood	urinary-tract infection	East Japan	Ishikawa	SC2	188	3	1	1	8	1	1	1	188	t189	-	-	-	-	-	-	-	-	-	-	-	-	-	-	-	-	-	-	-	-	-	-	-	-	-	+	-	-
17005-19-S017	PRJDB15501	SAMD00591035	DRR456442	2020-01-10	female	93ｙ	blood	device-related infection	East Japan	Ishikawa	SC8	5	1	4	1	4	12	1	10	5	t002	II	-	-	-	+	-	-	+	+	-	+	-	-	+	+	+	+	+	-	-	-	-	-	-	-	+	-	-
17005-19-S018	PRJDB15501	SAMD00591036	DRR456443	2019-12-19	male	99y	blood	unknown	East Japan	Ishikawa	SC1	1	1	1	1	1	1	1	1	1	t1784	IVa	-	-	-	-	-	-	-	-	+	-	-	-	-	-	-	-	-	-	-	-	-	-	-	-	+	-	-
17005-19-S019	PRJDB15501	SAMD00591037	DRR456444	2020-01-19	male	91y	blood	unknown	East Japan	Ishikawa	SC3	8	3	3	1	1	4	4	3	8	t008	-	-	-	-	-	-	-	-	-	-	-	-	+	-	-	-	-	-	+	-	-	-	-	-	-	+	-	-
17005-19-S020	PRJDB15501	SAMD00591038	DRR456445	2020-01-22	male	83y	blood	unknown	East Japan	Ishikawa	SC9	508	10	40	8	6	10	3	2	508	t050	-	-	-	-	+	-	-	+	+	-	+	-	-	+	+	+	+	-	-	-	-	-	-	-	+	+	-	-
17005-19-S021	PRJDB15501	SAMD00591039	DRR456446	2020-01-24	female	89y	blood	unknown	East Japan	Ishikawa	SC7	88	22	1	14	23	12	4	31	88	t729	-	-	-	-	-	-	-	-	-	-	-	-	-	-	-	-	-	-	-	-	-	-	-	-	-	+	-	-
17005-19-S023	PRJDB15501	SAMD00591040	DRR456447	2020-02-18	male	78ｙ	blood	unknown	East Japan	Ishikawa	SC1	1	1	1	1	1	1	1	1	1	t1784	IVa	-	+	-	-	-	-	-	-	+	-	-	+	-	-	-	-	-	+	-	-	-	-	-	-	+	-	-
17005-19-S024	PRJDB15501	SAMD00591041	DRR456448	2020-03-15	male	54y	blood	unknown	East Japan	Ishikawa	SC1	1	1	1	1	1	1	1	1	1	t1784	IVa	-	-	-	-	-	-	-	-	+	-	-	-	-	-	-	-	-	-	-	-	-	-	-	-	+	-	-
17005-19-S025	PRJDB15501	SAMD00591042	DRR456449	2020-03-15	female	74y	blood	device-related infection	East Japan	Ishikawa	SC6	97	3	1	1	1	1	5	3	97	t267	-	-	-	-	-	-	-	-	-	-	-	-	-	-	-	-	-	-	-	-	-	-	-	-	-	+	-	-
17005-19-S026	PRJDB15501	SAMD00591043	DRR456450	2020-04-09	male	89y	blood	unknown	East Japan	Ishikawa	SC1	1	1	1	1	1	1	1	1	1	t1784	-	-	+	-	-	-	-	-	-	+	-	-	+	-	-	-	-	-	+	-	-	-	-	-	-	+	-	-
17005-19-S027	PRJDB15501	SAMD00591044	DRR456451	2020-05-29	female	70y	blood	bone infection	East Japan	Ishikawa	SC7	12	1	3	1	8	11	5	11	12	t3938	-	-	-	-	-	-	-	-	-	-	-	-	-	-	-	-	-	+	-	-	-	-	-	-	-	+	-	+
17005-19-S028	PRJDB15501	SAMD00591045	DRR456452	2020-06-29	female	72y	blood	unknown	East Japan	Ishikawa	SC5	20	4	9	1	8	1	10	8	20	t2094	-	-	-	-	-	-	-	-	+	-	+	-	-	-	+	+	+	-	-	-	-	-	-	-	-	+	+	-
17005-19-S029	PRJDB15501	SAMD00591046	DRR456453	2020-04-01	female	76y	blood	unknown	East Japan	Ishikawa	SC1	1	1	1	1	1	1	1	1	1	ND	IVa	-	+	-	-	-	-	-	-	+	-	-	+	-	-	-	-	-	+	-	-	-	-	-	-	+	-	-
17005-19-S030	PRJDB15501	SAMD00591047	DRR456454	2020-04-10	male	80y	blood	unknown	East Japan	Ishikawa	SC3	8	3	3	1	1	4	4	3	8	ND	IVa	-	-	+	-	-	-	-	-	-	-	-	-	-	-	-	-	+	-	-	-	-	-	-	-	+	-	-
17005-19-S031	PRJDB15501	SAMD00591048	DRR456455	2020-06-03	male	82y	blood	unknown	East Japan	Ishikawa	SC1	1	1	1	1	1	1	1	1	1	t1784	IVa	-	+	-	-	-	-	-	-	+	-	-	-	-	-	-	-	-	+	-	-	-	-	-	-	+	-	-
17005-19-S032	PRJDB15501	SAMD00591049	DRR456456	2020-06-07	male	84y	blood	device-related infection	East Japan	Ishikawa	SC1	1	1	1	1	1	1	1	1	1	t1784	IVa	-	+	-	-	-	-	-	-	+	-	-	+	-	-	-	-	-	+	-	-	-	-	-	-	+	-	-
17005-19-S033	PRJDB15501	SAMD00591050	DRR456457	2020-06-16	female	54y	blood	device-related infection	East Japan	Ishikawa	SC1	1	1	1	1	1	1	1	1	1	t1784	IVa	-	+	-	-	-	-	-	-	+	-	-	+	-	-	-	-	-	+	-	-	-	-	-	-	+	-	-
17005-19-S034	PRJDB15501	SAMD00591051	DRR456458	2020-06-28	male	71y	blood	device-related infection	East Japan	Ishikawa	SC1	1	1	1	1	1	1	1	1	1	ND	IVa	-	+	-	-	-	-	-	-	+	-	-	+	-	-	-	-	-	+	-	-	-	-	-	-	+	-	-
17005-19-S035	PRJDB15501	SAMD00591052	DRR456459, DRR546378	2019-09-03	male	91y	blood	pneumonia	East Japan	Ishikawa	SC8	764	1	136	1	4	12	1	10	5	t002	IIa	II	-	+	-	-	-	-	+	-	+	-	-	-	+	+	+	-	-	-	-	-	-	-	-	+	-	-
17010-19-S001	PRJDB15501	SAMD00591053	DRR456460, DRR457474	2019-10-27	male	68y	blood	device-related infection	East Japan	Ishikawa	SC3	8	3	3	1	1	4	4	3	8	t024	-	-	+	-	-	+	-	-	-	-	-	+	-	-	-	-	-	-	-	+	-	-	-	-	-	+	-	-
18006-19-S001	PRJDB15501	SAMD00591054	DRR456461	2019-11-13	male	70ｙ	blood	unknown	East Japan	Fukui	SC1	1	1	1	1	1	1	1	1	1	t127	-	-	+	+	-	-	-	-	-	+	-	-	+	-	-	-	-	-	+	-	-	-	-	-	-	+	-	-
21016-19-S001	PRJDB15501	SAMD00591055	DRR456462	2019-06-21	female	8d	blood	device-related infection	East Japan	Gifu	SC1	1	1	1	1	1	1	1	1	1	t1784	IVa	-	+	-	-	-	-	-	-	+	-	-	-	-	-	-	-	-	+	-	-	-	-	-	-	+	-	-
21016-19-S002	PRJDB15501	SAMD00591056	DRR456463	2019-11-12	male	76y	blood	device-related infection	East Japan	Gifu	SC1	1	1	1	1	1	1	1	1	1	t1784	IVa	-	+	-	-	-	-	-	-	+	-	-	+	-	-	-	-	-	+	-	-	-	-	-	-	+	-	-
21016-19-S004	PRJDB15501	SAMD00591057	DRR456464	2020-04-14	male	25y	blood	device-related infection	East Japan	Gifu	SC1	2725	1	1	41	1	1	1	1	1	t1784	IVa	-	+	-	-	-	-	-	-	+	-	-	+	-	-	-	-	-	+	-	-	-	-	-	-	+	-	-
21016-19-S005	PRJDB15501	SAMD00591058	DRR456465	2020-04-18	male	85y	blood	unknown	East Japan	Gifu	SC3	630	12	3	1	1	4	4	3	8	t377	-	-	-	-	-	-	-	-	-	-	-	-	-	-	-	-	-	-	-	-	-	-	-	-	-	+	-	-
21016-19-S006	PRJDB15501	SAMD00591059	DRR456466, DRR546379	2020-05-18	male	82y	blood	unknown	East Japan	Gifu	SC8	764	1	136	1	4	12	1	10	5	t002	IIa	-	-	-	-	-	-	-	+	-	+	-	+	-	+	+	+	-	+	-	-	-	-	-	-	+	-	-
21016-19-S007	PRJDB15501	SAMD00591060	DRR456467	2020-05-24	male	1m	blood	device-related infection	East Japan	Gifu	SC2	188	3	1	1	8	1	1	1	188	t189	-	-	-	-	-	-	-	-	-	-	-	-	-	-	-	-	-	-	-	-	-	-	-	-	-	+	-	-
22026-19-S001	PRJDB15501	SAMD00591061	DRR456468	2019-12-13	female	63y	blood	device-related infection	East Japan	Shizuoka	SC1	1	1	1	1	1	1	1	1	1	t1784	IVa	-	+	-	-	-	-	-	-	+	-	-	+	-	-	-	-	-	+	-	-	-	-	-	-	+	-	-
22026-19-S002	PRJDB15501	SAMD00591062	DRR456469	2019-12-27	male	38y	blood	skin and soft tissue infection	East Japan	Shizuoka	SC8	5	1	4	1	4	12	1	10	5	t002	IIa	-	-	-	+	-	-	+	+	-	+	-	-	+	+	+	+	-	-	-	-	-	-	-	-	+	-	-
22026-19-S003	PRJDB15501	SAMD00591063	DRR456470	2019-12-31	male	71y	blood	skin and soft tissue infection	East Japan	Shizuoka	SC10	30	2	2	2	2	6	3	2	30	t3508	-	-	-	-	-	-	-	+	+	-	+	-	-	-	+	-	+	-	-	-	-	-	+	-	+	-	-	-
22026-19-S004	PRJDB15501	SAMD00591064	DRR456471	2020-01-08	male	69ｙ	blood	device-related infection	East Japan	Shizuoka	SC9	45	10	14	8	6	10	3	2	45	t065	-	-	-	-	-	-	-	-	+	-	+	-	-	-	+	+	+	-	-	-	-	-	-	-	+	+	-	-
22026-19-S005	PRJDB15501	SAMD00591065	DRR456472	2020-01-04	male	67ｙ	blood	device-related infection	East Japan	Shizuoka	SC3	8	3	3	1	1	4	4	3	8	t1767	-	-	-	-	-	-	-	-	-	-	-	-	-	-	-	-	-	+	-	-	-	-	-	-	-	+	-	-
22026-19-S006	PRJDB15501	SAMD00591066	DRR456473	2020-01-16	male	89ｙ	blood	device-related infection	East Japan	Shizuoka	SC4	15	13	13	1	1	12	11	13	15	t084	-	-	-	+	-	-	-	-	-	-	-	-	-	-	-	-	-	-	-	-	-	-	-	-	-	+	-	-
22026-19-S007	PRJDB15501	SAMD00591067	DRR456474, DRR457475	2020-01-22	female	81ｙ	blood	device-related infection	East Japan	Shizuoka	SC1	2764	1	1	346	1	1	1	1	1	t1784	-	-	-	-	-	-	-	-	-	+	-	-	-	-	-	-	-	-	-	-	-	-	-	-	-	+	-	-
22026-19-S008	PRJDB15501	SAMD00591068	DRR456475	2020-01-28	male	89ｙ	blood	unknown	East Japan	Shizuoka	SC11	7478	3	35	19	2	890	26	39	398	t1170	-	-	-	-	-	-	-	-	-	-	-	-	-	-	-	-	-	-	-	-	-	-	-	-	-	-	-	-
22026-19-S009	PRJDB15501	SAMD00591069	DRR456476	2020-01-30	male	85ｙ	blood	device-related infection	East Japan	Shizuoka	SC1	2764	1	1	346	1	1	1	1	1	t1784	IVa	-	+	-	-	-	-	-	-	+	-	-	+	-	-	-	-	-	+	-	-	-	-	-	-	+	-	-
22026-19-S010	PRJDB15501	SAMD00591070	DRR456477	2020-01-31	male	69ｙ	blood	device-related infection	East Japan	Shizuoka	SC1	7479	872	1	1	1	1	443	1	1	t1784	IVa	-	-	-	-	-	-	-	-	+	-	-	-	-	-	-	-	-	-	-	-	-	-	-	-	+	-	-
22026-19-S011	PRJDB15501	SAMD00591071	DRR456478	2020-02-01	male	96ｙ	blood	unknown	East Japan	Shizuoka	SC6	97	3	1	1	1	1	5	3	97	t267	-	-	-	-	-	-	-	-	-	-	-	-	-	-	-	-	-	-	-	-	-	-	-	-	-	+	-	-
22026-19-S012	PRJDB15501	SAMD00591072	DRR456479	2020-02-07	male	90ｙ	blood	unknown	East Japan	Shizuoka	SC5	2631	4	168	1	8	290	10	8	20	t164	-	-	-	-	-	-	-	-	+	-	+	-	-	-	+	+	+	-	-	-	-	-	-	-	-	+	+	-
22026-19-S013	PRJDB15501	SAMD00591073	DRR456480	2020-02-07	male	78ｙ	blood	urinary-tract infection	East Japan	Shizuoka	SC7	12	1	3	1	8	11	5	11	12	t160	-	-	-	+	-	-	-	-	-	-	-	-	-	-	-	-	-	+	-	-	-	-	-	-	-	+	-	+
22026-19-S014	PRJDB15501	SAMD00591074	DRR456481	2020-02-19	female	65ｙ	blood	urinary-tract infection	East Japan	Shizuoka	SC2	188	3	1	1	8	1	1	1	188	t189	-	-	-	+	-	-	-	-	-	-	-	-	-	-	-	-	-	-	-	-	-	-	-	-	-	+	-	-
22026-19-S015	PRJDB15501	SAMD00591075	DRR456482	2020-02-27	male	88ｙ	blood	unknown	East Japan	Shizuoka	SC2	188	3	1	1	8	1	1	1	188	t189	-	-	-	-	-	-	-	-	-	-	-	-	-	-	-	-	-	-	-	-	-	-	-	-	-	+	-	-
22026-19-S017	PRJDB15501	SAMD00591076	DRR456483	2020-03-15	male	88ｙ	blood	unknown	East Japan	Shizuoka	SC4	2730	13	13	1	1	302	11	13	15	t346	-	-	-	-	-	-	-	-	-	-	-	-	-	-	-	-	-	-	-	-	-	-	-	-	-	+	-	-
22026-19-S018	PRJDB15501	SAMD00591077	DRR456484	2020-03-18	female	87ｙ	blood	unknown	East Japan	Shizuoka	SC2	188	3	1	1	8	1	1	1	188	t189	-	-	-	+	-	-	-	-	-	-	-	-	-	-	-	-	-	-	-	-	-	-	-	-	-	+	-	-
22026-19-S019	PRJDB15501	SAMD00591078	DRR456485	2020-03-20	female	66ｙ	blood	device-related infection	East Japan	Shizuoka	SC3	8	3	3	1	1	4	4	3	8	t008	IVk	-	-	-	-	-	-	-	-	-	-	-	-	-	-	-	-	-	-	-	-	-	-	-	-	+	-	-
22026-19-S020	PRJDB15501	SAMD00591079	DRR456486	2020-03-23	female	80ｙ	blood	device-related infection	East Japan	Shizuoka	SC1	1	1	1	1	1	1	1	1	1	t1784	IVa	-	+	-	-	-	-	-	-	+	-	-	+	-	-	-	-	-	+	-	-	-	-	-	-	+	-	-
22026-19-S021	PRJDB15501	SAMD00591080	DRR456487	2020-04-01	male	71y	blood	unknown	East Japan	Shizuoka	SC1	2764	1	1	346	1	1	1	1	1	t1784	IVa	-	+	-	-	-	-	-	-	+	-	-	-	-	-	-	-	-	+	-	-	-	-	-	-	+	-	-
22026-19-S022	PRJDB15501	SAMD00591081	DRR456488	2020-04-01	male	74ｙ	blood	unknown	East Japan	Shizuoka	SC6	7480	3	38	1	1	1	5	3	97	t267	-	-	-	-	-	-	-	-	-	-	-	-	-	-	-	-	-	-	-	-	-	-	-	-	-	+	-	-
22026-19-S024	PRJDB15501	SAMD00591082	DRR456489	2020-05-08	male	63y	blood	device-related infection	East Japan	Shizuoka	SC1	1	1	1	1	1	1	1	1	1	t1784	IVa	-	+	-	-	-	-	-	-	+	-	-	+	-	-	-	-	-	+	-	-	-	-	-	-	+	-	-
22026-19-S026	PRJDB15501	SAMD00591083	DRR456490	2020-06-19	male	77ｙ	blood	device-related infection	East Japan	Shizuoka	SC1	2725	1	1	41	1	1	1	1	1	t1784	IVa	-	-	-	-	-	-	-	-	+	-	-	-	-	-	-	-	-	-	-	-	-	-	-	-	+	-	-
22026-19-S027	PRJDB15501	SAMD00591084	DRR456491	2020-06-24	male	88ｙ	blood	device-related infection	East Japan	Shizuoka	SC3	8	3	3	1	1	4	4	3	8	ND	IVl	-	-	-	+	-	-	+	-	-	-	-	-	+	-	-	-	+	-	-	-	-	-	-	-	+	-	-
22026-19-S028	PRJDB15501	SAMD00591085	DRR456492	2020-07-06	male	84ｙ	blood	device-related infection	East Japan	Shizuoka	SC3	8	3	3	1	1	4	4	3	8	t024	IVa	-	-	-	-	-	-	-	-	-	-	-	+	-	-	-	-	-	+	-	-	-	-	-	-	+	-	-
22037-19-S001	PRJDB15501	SAMD00591086	DRR456493	2019-05-01	male	70y	blood	device-related infection	East Japan	Shizuoka	SC1	1	1	1	1	1	1	1	1	1	t1784	IVa	-	-	-	-	-	-	-	-	+	-	-	-	-	-	-	-	-	-	-	-	-	-	-	-	+	-	-
22037-19-S002	PRJDB15501	SAMD00591087	DRR456494	2019-07-08	male	92y	blood	urinary-tract infection	East Japan	Shizuoka	SC1	1	1	1	1	1	1	1	1	1	t1784	IVa	-	+	-	-	-	-	-	-	+	-	-	+	-	-	-	-	-	+	-	-	-	-	-	-	+	-	-
22037-19-S003	PRJDB15501	SAMD00591088	DRR456495	2020-01-25	male	75ｙ	blood	skin and soft tissue infection	East Japan	Shizuoka	SC1	1	1	1	1	1	1	1	1	1	t693	IVa	-	+	-	-	-	-	-	-	+	-	-	+	-	-	-	-	-	+	-	-	-	-	-	-	+	-	-
23005-19-S002	PRJDB15501	SAMD00591089	DRR456496	2019-08-28	female	85y	blood	device-related infection	East Japan	Aichi	SC2	188	3	1	1	8	1	1	1	188	t189	-	-	-	-	-	-	-	-	-	-	-	-	-	-	-	-	-	-	-	-	-	-	-	-	-	+	-	-
23005-19-S003	PRJDB15501	SAMD00591090	DRR456497	2019-12-06	male	78ｙ	blood	bone infection	East Japan	Aichi	SC9	508	10	40	8	6	10	3	2	508	t2334	-	-	-	-	-	-	-	-	+	-	+	-	-	-	+	+	+	-	-	-	-	-	-	-	-	+	-	-
23005-19-S006	PRJDB15501	SAMD00591091	DRR456498	2019-12-23	male	81ｙ	blood	device-related infection	East Japan	Aichi	SC8	5	1	4	1	4	12	1	10	5	t4255	-	-	-	-	+	-	-	+	+	-	+	-	-	+	+	+	+	-	-	-	-	-	-	-	-	+	-	-
23005-19-S007	PRJDB15501	SAMD00591092	DRR456499	2020-02-02	male	72y	blood	others	East Japan	Aichi	SC2	188	3	1	1	8	1	1	1	188	t189	-	-	-	-	-	-	-	-	-	-	-	-	-	-	-	-	-	-	-	-	-	-	-	-	-	+	-	-
23005-19-S008	PRJDB15501	SAMD00591093	DRR456500	2020-02-17	male	71y	blood	skin and soft tissue infection	East Japan	Aichi	SC7	25	4	1	4	1	5	5	4	25	t078	-	-	-	-	-	-	-	-	+	-	+	-	-	-	+	+	+	-	-	-	-	-	-	-	+	+	-	-
23005-19-S011	PRJDB15501	SAMD00591094	DRR456501	2020-02-17	male	74y	blood	unknown	East Japan	Aichi	SC1	1	1	1	1	1	1	1	1	1	t7744	IVa	-	+	-	-	-	-	-	-	+	-	-	+	-	-	-	-	-	-	-	-	-	-	-	-	+	-	-
23005-19-S012	PRJDB15501	SAMD00591095	DRR456502	2020-02-20	female	78y	blood	unknown	East Japan	Aichi	SC2	188	3	1	1	8	1	1	1	188	t1858	-	-	-	-	-	-	-	-	-	-	-	-	-	-	-	-	-	-	-	-	-	-	-	-	-	+	-	-
23005-19-S015	PRJDB15501	SAMD00591096	DRR456503	2020-02-27	female	86y	blood	unknown	East Japan	Aichi	SC3	8	3	3	1	1	4	4	3	8	t574	-	-	-	-	-	-	-	-	-	-	-	-	-	-	-	-	-	-	-	-	-	-	-	-	-	+	-	-
23005-19-S017	PRJDB15501	SAMD00591097	DRR456504	2020-03-12	male	84y	blood	pneumonia	East Japan	Aichi	SC10	30	2	2	2	2	6	3	2	30	t012	-	-	-	-	-	-	-	+	+	-	+	-	-	-	+	+	+	-	-	-	-	-	+	-	+	-	-	-
23005-19-S018	PRJDB15501	SAMD00591098	DRR456505	2020-03-24	male	85y	blood	unknown	East Japan	Aichi	SC1	1	1	1	1	1	1	1	1	1	t1784	IVa	-	+	-	-	-	-	-	-	+	-	-	+	-	-	-	-	-	+	-	-	-	-	-	-	+	-	-
23005-19-S019	PRJDB15501	SAMD00591099	DRR456506	2020-04-02	female	79y	blood	unknown	East Japan	Aichi	SC1	1	1	1	1	1	1	1	1	1	t7744	IVa	-	+	-	-	-	-	-	-	+	-	-	-	-	-	-	-	-	+	-	-	-	-	-	-	+	-	-
23005-19-S021	PRJDB15501	SAMD00591100	DRR456507	2020-05-04	male	62y	blood	bone infection	East Japan	Aichi	SC6	834	3	124	1	1	1	1	40	834	ND	IVc	-	-	-	+	-	-	+	-	-	-	-	-	+	-	-	-	-	-	-	-	-	-	-	-	+	-	-
23050-19-S001	PRJDB15501	SAMD00591101	DRR456508	2019-04-10	female	78y	blood	skin and soft tissue infection	East Japan	Aichi	SC7	6	12	4	1	4	12	1	3	6	t9472	-	-	+	-	-	-	-	-	-	-	-	-	-	-	-	-	-	-	-	-	-	-	-	-	-	+	-	-
23050-19-S003	PRJDB15501	SAMD00591102	DRR456509	2019-04-24	male	89y	blood	pneumonia	East Japan	Aichi	SC1	1	1	1	1	1	1	1	1	1	t1784	IVa	-	-	-	-	-	-	-	-	+	-	-	-	-	-	-	-	-	-	-	-	-	-	-	-	+	-	-
23050-19-S004	PRJDB15501	SAMD00591103	DRR456510	2019-05-10	male	72y	blood	unknown	East Japan	Aichi	SC4	15	13	13	1	1	12	11	13	15	t3345	-	-	-	-	-	-	-	-	-	-	-	-	-	-	-	-	-	-	-	-	-	-	-	-	-	+	-	-
23050-19-S005	PRJDB15501	SAMD00591104	DRR456511	2019-05-19	female	96y	blood	urinary-tract infection	East Japan	Aichi	SC1	1	1	1	1	1	1	1	1	1	t693	IVa	-	+	-	-	-	-	-	-	-	-	-	+	-	-	-	-	-	+	-	-	-	-	-	-	+	-	-
23050-19-S007	PRJDB15501	SAMD00591105	DRR456512	2019-07-09	male	80y	blood	unknown	East Japan	Aichi	SC1	1	1	1	1	1	1	1	1	1	t1784	IVa	-	+	-	-	-	-	-	-	+	-	-	+	-	-	-	-	-	+	-	-	-	-	-	-	+	-	-
23050-19-S008	PRJDB15501	SAMD00591106	DRR456513	2019-10-01	female	68y	blood	unknown	East Japan	Aichi	SC12	121	6	5	6	2	7	14	5	121	t5072	-	-	-	-	-	-	-	-	+	-	+	-	-	-	+	+	+	-	-	-	-	-	+	-	-	+	+	+
23050-19-S009	PRJDB15501	SAMD00591107	DRR456514	2019-11-06	male	83y	blood	unknown	East Japan	Aichi	SC1	81	1	1	1	9	1	1	1	81	t559	-	-	+	-	-	-	-	-	-	+	-	-	+	-	-	-	-	-	+	-	-	-	-	-	-	+	-	-
23050-19-S012	PRJDB15501	SAMD00591108	DRR456515	2019-11-15	female	82y	blood	urinary-tract infection	East Japan	Aichi	SC1	1	1	1	1	1	1	1	1	1	t7744	IVa	II	-	-	-	-	-	-	-	+	-	-	-	-	-	-	-	-	-	-	-	-	-	-	-	+	-	-
23050-19-S013	PRJDB15501	SAMD00591109	DRR456516	2020-01-14	female	77y	blood	unknown	East Japan	Aichi	SC1	1	1	1	1	1	1	1	1	1	t1784	IVa	-	+	-	-	-	-	-	-	+	-	-	+	-	-	-	-	-	+	-	-	-	-	-	-	+	-	-
23050-19-S014	PRJDB15501	SAMD00591110	DRR456517	2020-01-22	female	79y	blood	urinary-tract infection	East Japan	Aichi	SC1	1	1	1	1	1	1	1	1	1	t1784	IVa	-	+	-	-	-	-	-	-	+	-	-	-	-	-	-	-	-	-	-	-	-	-	-	-	+	-	-
23050-19-S016	PRJDB15501	SAMD00591111	DRR456518	2020-03-04	female	91y	blood	unknown	East Japan	Aichi	SC10	30	2	2	2	2	6	3	2	30	t363	-	-	+	-	-	-	-	-	+	-	+	-	-	-	+	+	+	-	-	-	-	-	+	-	+	-	-	-
23050-19-S018	PRJDB15501	SAMD00591112	DRR456519	2020-04-20	female	79y	blood	unknown	East Japan	Aichi	SC1	1	1	1	1	1	1	1	1	1	t1784	IVa	-	+	-	-	-	-	-	-	+	-	-	+	-	-	-	-	-	+	-	-	-	-	-	-	+	-	-
23050-19-S019	PRJDB15501	SAMD00591113	DRR456520	2020-05-03	male	86y	blood	unknown	East Japan	Aichi	SC3	8	3	3	1	1	4	4	3	8	t5071	IVj	-	-	-	-	-	-	-	-	-	-	-	-	-	-	-	-	+	-	-	-	-	-	-	-	+	-	-
24001-19-S004	PRJDB15501	SAMD00591114	DRR456521	2019-07-04	male	66y	blood	unknown	East Japan	Mie	SC1	81	1	1	1	9	1	1	1	81	t607	-	-	+	-	-	-	-	-	-	+	-	-	-	-	-	-	-	-	-	-	-	-	-	-	-	+	-	-
24001-19-S005	PRJDB15501	SAMD00591115	DRR456522	2019-07-09	female	77y	blood	unknown	East Japan	Mie	SC1	81	1	1	1	9	1	1	1	81	t607	-	-	+	-	-	-	-	-	-	+	-	-	-	-	-	-	-	-	-	-	-	-	-	-	-	+	-	-
24001-19-S011	PRJDB15501	SAMD00591116	DRR456523	2019-10-21	female	91y	blood	unknown	East Japan	Mie	SC3	8	3	3	1	1	4	4	3	8	t5071	IVj	-	-	-	-	-	-	-	-	-	-	-	-	-	-	-	-	+	-	-	-	-	-	-	-	+	-	-
24001-19-S012	PRJDB15501	SAMD00591117	DRR456524	2019-11-18	male	31y	blood	unknown	East Japan	Mie	SC1	1	1	1	1	1	1	1	1	1	t4494	IVa	-	+	-	-	-	-	-	-	+	-	-	+	-	-	-	-	-	+	-	-	-	-	-	-	+	-	-
24001-19-S013	PRJDB15501	SAMD00591118	DRR456525	2020-02-22	female	18y	blood	unknown	East Japan	Mie	SC1	2725	1	1	41	1	1	1	1	1	t1784	IVa	-	+	-	-	-	-	-	-	+	-	-	+	-	-	-	-	-	+	-	-	-	-	-	-	+	-	-
24001-19-S016	PRJDB15501	SAMD00591119	DRR456526	2020-04-30	male	10y	blood	unknown	East Japan	Mie	SC6	97	3	1	1	1	1	5	3	97	t267	-	-	-	-	-	-	-	-	-	-	-	-	-	-	-	-	-	-	-	-	-	-	-	-	-	+	-	-
24001-19-S017	PRJDB15501	SAMD00591120	DRR456527	2020-05-05	male	6m	blood	unknown	East Japan	Mie	SC6	7481	3	1	1	1	891	5	3	97	t359	-	-	-	-	-	-	-	-	-	-	-	-	-	-	-	-	-	-	-	-	-	-	-	-	-	+	-	-
24001-19-S018	PRJDB15501	SAMD00591121	DRR456528	2020-05-25	male	5y	blood	unknown	East Japan	Mie	SC3	8	3	3	1	1	4	4	3	8	t3240	-	-	+	-	-	+	-	-	-	-	-	+	-	-	-	-	-	-	-	+	-	-	-	-	-	+	-	-
24001-19-S020	PRJDB15501	SAMD00591122	DRR456529	2020-05-29	male	19y	blood	infectious endocarditis	East Japan	Mie	SC4	15	13	13	1	1	12	11	13	15	t2036	-	-	-	+	-	-	-	-	-	-	-	-	-	-	-	-	-	-	-	-	-	-	-	-	-	+	-	-
24001-19-S021	PRJDB15501	SAMD00591123	DRR456530	2020-06-05	male	19y	blood	infectious endocarditis	East Japan	Mie	SC4	15	13	13	1	1	12	11	13	15	t2036	-	-	-	+	-	-	-	-	-	-	-	-	-	-	-	-	-	-	-	-	-	-	-	-	-	+	-	-
26027-19-S002	PRJDB15501	SAMD00591124	DRR456531	2020-05-04	male	78y	blood	device-related infection	West Japan	Kyoto	SC3	8	3	3	1	1	4	4	3	8	t5071	IVj	-	-	-	-	-	-	-	-	-	-	-	-	-	-	-	-	-	-	-	-	-	-	-	-	+	-	-
26027-19-S006	PRJDB15501	SAMD00591125	DRR456532	2020-06-25	female	78y	blood	unknown	West Japan	Kyoto	SC4	15	13	13	1	1	12	11	13	15	t491	-	-	-	-	-	-	-	-	-	-	-	-	-	-	-	-	-	-	-	-	-	-	-	-	-	+	-	-
26035-19-S001	PRJDB15501	SAMD00591126	DRR456533	2019-11-11	male	77y	blood	pneumonia	West Japan	Kyoto	SC3	8	3	3	1	1	4	4	3	8	t5071	IVa	-	-	-	-	-	-	-	-	-	-	-	-	-	-	-	-	+	-	-	-	-	-	-	-	+	-	-
26035-19-S002	PRJDB15501	SAMD00591127	DRR456534	2019-12-23	male	76y	blood	device-related infection	West Japan	Kyoto	SC1	1	1	1	1	1	1	1	1	1	t1784	IVa	-	+	-	-	-	-	-	-	+	-	-	-	-	-	-	-	-	+	-	-	-	-	-	-	+	-	-
28055-19-S001	PRJDB15501	SAMD00591128	DRR456535	2019-04-08	female	63y	blood	pneumonia	West Japan	Hyogo	SC9	45	10	14	8	6	10	3	2	45	t1646	-	-	-	-	-	-	-	-	+	-	+	-	-	-	+	+	+	-	-	-	-	-	-	-	+	+	-	-
28055-19-S002	PRJDB15501	SAMD00591129	DRR456536	2019-04-22	female	92y	blood	skin and soft tissue infection	West Japan	Hyogo	SC1	1	1	1	1	1	1	1	1	1	t1784	IVa	-	+	-	-	-	-	-	-	+	-	-	+	-	-	-	-	-	+	-	-	-	-	-	-	+	-	-
28055-19-S003	PRJDB15501	SAMD00591130	DRR456537	2019-06-07	female	90ｙ	blood	device-related infection	West Japan	Hyogo	SC8	5	1	4	1	4	12	1	10	5	t002	IIa	-	-	-	+	-	-	+	+	-	+	-	-	+	+	+	+	-	-	-	-	-	-	-	-	+	-	-
28055-19-S004	PRJDB15501	SAMD00591131	DRR456538	2019-06-10	female	80ｙ	blood	unknown	West Japan	Hyogo	SC4	15	13	13	1	1	12	11	13	15	t1038	-	-	-	-	-	-	-	-	-	-	-	-	-	-	-	-	-	-	-	-	-	-	-	-	-	+	-	-
28055-19-S005	PRJDB15501	SAMD00591132	DRR456539	2019-06-27	female	52ｙ	blood	unknown	West Japan	Hyogo	SC1	1	1	1	1	1	1	1	1	1	t1784	IVa	-	+	-	-	-	-	-	-	+	-	-	+	-	-	-	-	-	+	-	-	-	-	-	-	+	-	-
28055-19-S006	PRJDB15501	SAMD00591133	DRR456540	2019-10-23	male	81ｙ	blood	unknown	West Japan	Hyogo	SC3	8	3	3	1	1	4	4	3	8	t5071	IVj	-	-	-	-	-	-	-	-	-	-	-	-	-	-	-	-	+	-	-	-	-	-	-	-	+	-	-
28055-19-S007	PRJDB15501	SAMD00591134	DRR456541	2020-02-23	male	78ｙ	blood	unknown	West Japan	Hyogo	SC1	1	1	1	1	1	1	1	1	1	t1784	IVa	-	+	-	-	-	-	-	-	+	-	-	+	-	-	-	-	-	+	-	-	-	-	-	-	+	-	-
28057-19-S001	PRJDB15501	SAMD00591135	DRR456542	2019-04-03	male	77y	blood	unknown	West Japan	Hyogo	SC3	8	3	3	1	1	4	4	3	8	t5071	IVj	-	-	-	-	-	-	-	-	-	-	-	-	-	-	-	-	+	-	-	-	-	-	-	-	+	-	-
28057-19-S002	PRJDB15501	SAMD00591136	DRR456543	2019-04-08	female	70y	blood	unknown	West Japan	Hyogo	SC3	8	3	3	1	1	4	4	3	8	t008	-	-	-	-	-	-	-	-	-	-	-	-	+	-	-	-	-	-	+	-	-	-	-	-	-	+	-	-
28057-19-S003	PRJDB15501	SAMD00591137	DRR456544	2019-04-15	female	68y	blood	skin and soft tissue infection	West Japan	Hyogo	SC3	8	3	3	1	1	4	4	3	8	t334	IVl	-	-	-	+	-	-	+	-	-	-	-	-	+	-	-	-	+	-	-	-	-	-	-	-	+	-	-
28057-19-S004	PRJDB15501	SAMD00591138	DRR456545, DRR457476	2019-04-15	male	79y	blood	pneumonia	West Japan	Hyogo	SC7	25	4	1	4	1	5	5	4	25	t759	-	-	-	-	-	-	-	-	+	-	+	-	-	-	+	+	+	-	-	-	-	-	-	-	+	+	-	-
28057-19-S005	PRJDB15501	SAMD00591139	DRR456546, DRR546380	2019-04-17	male	78y	blood	unknown	West Japan	Hyogo	SC8	764	1	136	1	4	12	1	10	5	t002	IIa	-	-	+	-	-	-	-	+	-	+	-	-	-	+	+	+	-	-	-	-	-	-	-	-	+	-	-
28057-19-S006	PRJDB15501	SAMD00591140	DRR456547	2019-05-05	female	90y	blood	pneumonia	West Japan	Hyogo	SC9	45	10	14	8	6	10	3	2	45	t2045	-	-	-	-	-	-	-	-	+	-	+	-	-	-	+	-	+	-	-	-	-	-	-	-	+	+	-	-
28057-19-S007	PRJDB15501	SAMD00591141	DRR456548	2019-05-06	male	82y	blood	device-related infection	West Japan	Hyogo	SC3	8	3	3	1	1	4	4	3	8	t008	IVl	-	-	-	+	-	-	+	-	-	-	-	-	+	-	-	-	-	-	-	-	-	-	-	-	+	-	-
28057-19-S008	PRJDB15501	SAMD00591142	DRR456549	2019-06-19	male	88y	blood	skin and soft tissue infection	West Japan	Hyogo	SC3	8	3	3	1	1	4	4	3	8	t5071	IVj	-	-	-	-	-	-	-	-	-	-	-	-	-	-	-	-	-	-	-	-	-	-	-	-	+	-	-
28057-19-S009	PRJDB15501	SAMD00591143	DRR456550	2019-06-22	male	50y	blood	skin and soft tissue infection	West Japan	Hyogo	SC3	8	3	3	1	1	4	4	3	8	t5071	IVj	-	-	-	-	-	-	-	-	-	-	-	-	-	-	-	-	-	-	-	-	-	-	-	-	+	-	-
28057-19-S010	PRJDB15501	SAMD00591144	DRR456551	2019-07-06	male	83y	blood	others	West Japan	Hyogo	SC3	8	3	3	1	1	4	4	3	8	t8076	IVj	-	-	-	-	-	-	-	-	-	-	-	-	-	-	-	-	+	-	-	-	-	-	-	-	+	-	-
28057-19-S011	PRJDB15501	SAMD00591145	DRR456552	2019-07-14	male	17y	blood	skin and soft tissue infection	West Japan	Hyogo	SC2	188	3	1	1	8	1	1	1	188	t189	-	-	-	-	-	-	-	-	-	-	-	-	-	-	-	-	-	-	-	-	-	-	-	-	-	+	-	-
28057-19-S012	PRJDB15501	SAMD00591146	DRR456553, DRR457477	2019-07-20	female	85y	blood	unknown	West Japan	Hyogo	SC3	8	3	3	1	1	4	4	3	8	t5071	IVj	-	-	-	-	-	-	-	-	-	-	-	-	-	-	-	-	+	-	-	-	-	-	-	-	+	-	-
28057-19-S013	PRJDB15501	SAMD00591147	DRR456554	2019-08-03	male	74y	blood	pneumonia	West Japan	Hyogo	SC1	1	1	1	1	1	1	1	1	1	t1784	IVa	-	+	-	-	-	-	-	-	+	-	-	+	-	-	-	-	-	+	-	-	-	-	-	-	+	-	-
28057-19-S014	PRJDB15501	SAMD00591148	DRR456555	2019-08-05	female	15y	blood	others	West Japan	Hyogo	SC9	45	10	14	8	6	10	3	2	45	t065	-	-	-	-	-	-	-	-	+	-	+	-	-	-	+	-	-	-	-	-	-	-	-	-	-	+	-	-
28057-19-S015	PRJDB15501	SAMD00591149	DRR456556	2019-08-29	female	82y	blood	urinary-tract infection	West Japan	Hyogo	SC3	8	3	3	1	1	4	4	3	8	t1581	IVj	-	-	-	-	-	-	-	-	-	-	-	-	-	-	-	-	-	-	-	-	-	-	-	-	+	-	-
28057-19-S016	PRJDB15501	SAMD00591150	DRR456557	2019-10-14	male	85y	blood	skin and soft tissue infection	West Japan	Hyogo	SC3	8	3	3	1	1	4	4	3	8	t008	IVa	I	-	-	-	-	-	-	-	-	-	-	+	-	-	-	-	-	+	-	-	-	-	-	-	+	-	-
28057-19-S017	PRJDB15501	SAMD00591151	DRR456558	2019-11-14	male	21y	blood	skin and soft tissue infection	West Japan	Hyogo	SC10	30	2	2	2	2	6	3	2	30	t363	-	-	+	-	-	-	-	+	+	-	+	-	-	-	+	+	+	-	-	-	-	-	+	-	+	-	-	-
28057-19-S018	PRJDB15501	SAMD00591152	DRR456559	2019-11-26	male	89y	blood	pneumonia	West Japan	Hyogo	SC2	7482	3	1	1	8	1	1	993	188	ND	-	-	-	-	-	-	-	-	-	-	-	-	-	-	-	-	-	-	-	-	-	-	-	-	-	+	-	-
28057-19-S019	PRJDB15501	SAMD00591153	DRR456560	2019-12-19	male	82y	blood	skin and soft tissue infection	West Japan	Hyogo	SC11	398	3	35	19	2	20	26	39	398	t2876	-	-	-	-	-	-	-	-	-	-	-	-	-	-	-	-	-	-	-	-	-	-	-	-	-	-	-	-
28057-19-S020	PRJDB15501	SAMD00591154	DRR456561	2020-01-02	male	63y	blood	infectious endocarditis	West Japan	Hyogo	SC2	188	3	1	1	8	1	1	1	188	t189	-	-	-	-	-	-	-	-	-	-	-	-	-	-	-	-	-	-	-	-	-	-	-	-	-	+	-	-
28057-19-S021	PRJDB15501	SAMD00591155	DRR456562	2020-02-05	female	72y	blood	pneumonia	West Japan	Hyogo	SC2	7482	3	1	1	8	1	1	993	188	t2883	-	-	-	-	-	-	-	-	-	-	-	-	-	-	-	-	-	-	-	-	-	-	-	-	-	+	-	-
28057-19-S022	PRJDB15501	SAMD00591156	DRR456563	2020-02-18	male	72y	blood	skin and soft tissue infection	West Japan	Hyogo	SC8	5	1	4	1	4	12	1	10	5	t002	IIa	-	-	-	+	-	-	+	+	-	+	-	-	+	+	+	+	+	-	-	-	-	-	-	-	+	-	-
28057-19-S024	PRJDB15501	SAMD00591157	DRR456564	2020-02-24	female	86y	blood	device-related infection	West Japan	Hyogo	SC10	30	2	2	2	2	6	3	2	30	t12778	-	-	-	-	-	-	-	+	+	-	+	-	-	-	+	+	-	-	-	-	-	-	+	-	+	-	-	-
28057-19-S025	PRJDB15501	SAMD00591158	DRR456565	2020-03-07	female	94y	blood	unknown	West Japan	Hyogo	SC6	97	3	1	1	1	1	5	3	97	t6297	-	-	-	-	-	-	-	-	-	-	-	-	-	-	-	-	-	-	-	-	-	-	-	-	-	+	-	-
29016-19-S001	PRJDB15501	SAMD00591159	DRR456566	2019-11-05	male	89y	blood	device-related infection	West Japan	Nara	SC1	1	1	1	1	1	1	1	1	1	t1784, t17343	IVa	-	+	-	-	-	-	-	-	+	-	-	+	-	-	-	-	-	+	-	-	-	-	-	-	+	-	-
29016-19-S002	PRJDB15501	SAMD00591160	DRR456567	2020-11-27	female	56y	blood	unknown	West Japan	Nara	SC1	1	1	1	1	1	1	1	1	1	t1784	IVa	-	+	-	-	-	-	-	-	+	-	-	+	-	-	-	-	-	+	-	-	-	-	-	-	+	-	-
31011-19-S001	PRJDB15501	SAMD00591161	DRR456568	2019-12-04	male	92y	blood	unknown	West Japan	Tottori	SC1	81	1	1	1	9	1	1	1	81	t2207	-	-	+	-	-	-	-	-	-	+	-	-	+	-	-	-	-	-	+	-	-	-	-	-	-	+	-	-
31011-19-S003	PRJDB15501	SAMD00591162	DRR456569	2020-01-25	female	85y	blood	device-related infection	West Japan	Tottori	SC1	1	1	1	1	1	1	1	1	1	t1784	IVa	-	+	-	-	-	-	-	-	+	-	-	+	-	-	-	-	-	+	-	-	-	-	-	-	+	-	-
31011-19-S004	PRJDB15501	SAMD00591163	DRR456570	2020-02-16	male	60y	blood	device-related infection	West Japan	Tottori	SC13	7483	19	122	12	2	892	89	15	50	t11733	-	-	-	-	-	-	-	-	-	-	-	-	-	-	-	-	-	-	-	-	-	-	-	-	-	+	-	-
32013-19-S001	PRJDB15501	SAMD00591164	DRR456571	2019-10-21	male	96ｙ	blood	pneumonia	West Japan	Shimane	SC11	398	3	35	19	2	20	26	39	398	t2876	-	-	-	-	-	-	-	-	-	-	-	-	-	-	-	-	-	-	-	-	-	-	-	-	-	-	-	-
32013-19-S003	PRJDB15501	SAMD00591165	DRR456572	2019-10-30	male	72ｙ	blood	unknown	West Japan	Shimane	SC3	630	12	3	1	1	4	4	3	8	t4047	-	-	-	-	-	-	-	-	-	-	-	-	-	-	-	-	-	-	-	-	-	-	-	-	-	+	-	-
32013-19-S005	PRJDB15501	SAMD00591166	DRR456573	2019-11-20	female	70ｙ	blood	device-related infection	West Japan	Shimane	SC4	15	13	13	1	1	12	11	13	15	t335	-	-	-	-	-	-	-	-	-	-	-	-	-	-	-	-	-	-	-	-	-	-	-	-	-	+	-	-
32013-19-S010	PRJDB15501	SAMD00591167	DRR456574	2020-02-12	male	69ｙ	blood	urinary-tract infection	West Japan	Shimane	SC8	5	1	4	1	4	12	1	10	5	t212	-	-	-	-	-	-	-	-	+	-	+	-	-	-	+	+	+	+	-	-	-	-	-	-	-	+	-	-
32013-19-S013	PRJDB15501	SAMD00591168	DRR456575, DRR457478	2020-02-13	male	68ｙ	blood	device-related infection	West Japan	Shimane	SC8	5	1	4	1	4	12	1	10	5	t002	-	-	-	-	-	+	-	-	+	-	+	+	-	-	+	+	+	+	-	+	-	-	-	-	-	+	-	-
32013-19-S014	PRJDB15501	SAMD00591169	DRR456576	2020-05-04	male	76ｙ	blood	urinary-tract infection	West Japan	Shimane	SC8	5	1	4	1	4	12	1	10	5	t212	-	-	-	-	-	-	-	-	+	-	+	-	-	-	+	-	+	+	-	-	-	-	-	-	-	+	-	-
32013-19-S015	PRJDB15501	SAMD00591170	DRR456577	2020-05-15	female	91ｙ	blood	pneumonia	West Japan	Shimane	SC7	88	22	1	14	23	12	4	31	88	ND	-	-	-	-	-	-	-	-	-	-	-	-	-	-	-	-	-	-	-	-	-	-	-	-	-	+	-	-
32013-19-S017	PRJDB15501	SAMD00591171	DRR456578	2020-05-18	female	82ｙ	blood	unknown	West Japan	Shimane	SC2	188	3	1	1	8	1	1	1	188	t189	-	-	-	-	-	-	-	-	-	-	-	-	-	-	-	-	-	-	-	-	-	-	-	-	-	+	-	-
32017-19-S001	PRJDB15501	SAMD00591172	DRR456579	2020-06-27	female	19y	blood	device-related infection	West Japan	Shimane	SC3	8	3	3	1	1	4	4	3	8	t1767	IVl	-	-	-	+	-	-	+	-	-	-	-	-	+	-	-	-	+	-	-	-	-	-	-	-	+	-	-
33009-19-S001	PRJDB15501	SAMD00591173	DRR456580	2019-06-09	female	70y	blood	device-related infection	West Japan	Okayama	SC6	97	3	1	1	1	1	5	3	97	t267	-	-	-	-	-	-	-	-	-	-	-	-	-	-	-	-	-	-	-	-	-	-	-	-	-	+	-	-
33009-19-S002	PRJDB15501	SAMD00591174	DRR456581	2019-06-18	male	78y	blood	skin and soft tissue infection	West Japan	Okayama	SC8	7484	1	4	284	4	12	1	10	5	t002	IIa	-	-	-	+	-	-	+	+	-	-	-	-	+	-	-	-	+	-	-	-	-	-	-	-	+	-	-
33009-19-S003	PRJDB15501	SAMD00591175	DRR456582	2019-06-18	male	72ｙ	blood	skin and soft tissue infection	West Japan	Okayama	SC4	15	13	13	1	1	12	11	13	15	t368	-	-	-	-	-	-	-	-	-	-	-	-	-	-	-	-	-	-	-	-	-	-	-	-	-	+	-	-
33009-19-S004	PRJDB15501	SAMD00591176	DRR456583	2019-06-20	male	86ｙ	blood	bone infection	West Japan	Okayama	SC3	8	3	3	1	1	4	4	3	8	t1767	-	-	-	-	-	-	-	-	-	-	-	-	-	-	-	-	-	+	-	-	-	-	-	-	-	+	-	-
33009-19-S005	PRJDB15501	SAMD00591177	DRR456584	2019-06-21	female	48ｙ	blood	skin and soft tissue infection	West Japan	Okayama	SC3	8	3	3	1	1	4	4	3	8	ND	-	-	-	-	-	-	-	-	-	-	-	-	-	-	-	-	-	+	-	-	-	-	-	-	-	+	-	-
33009-19-S006	PRJDB15501	SAMD00591178	DRR456585, DRR546381	2019-06-22	female	75ｙ	blood	unknown	West Japan	Okayama	SC8	5	1	4	1	4	12	1	10	5	t179	-	-	-	-	-	-	-	-	+	-	+	-	-	-	+	+	+	-	-	-	-	-	-	-	-	+	-	-
33009-19-S007	PRJDB15501	SAMD00591179	DRR456586	2019-06-28	male	92ｙ	blood	device-related infection	West Japan	Okayama	SC3	8	3	3	1	1	4	4	3	8	t024	-	-	+	-	-	+	-	-	-	-	-	+	-	-	-	-	-	-	-	+	-	-	-	-	-	+	-	-
33009-19-S008	PRJDB15501	SAMD00591180	DRR456587	2019-07-01	female	95ｙ	blood	unknown	West Japan	Okayama	SC9	7485	10	14	918	6	10	3	2	45	t040	-	-	-	-	-	-	-	-	+	-	+	-	-	-	+	+	+	-	-	-	-	-	-	-	+	+	-	-
33009-19-S009	PRJDB15501	SAMD00591181	DRR456588	2019-07-02	male	59ｙ	blood	device-related infection	West Japan	Okayama	SC3	8	3	3	1	1	4	4	3	8	t622	IVj	-	-	-	-	-	-	-	-	-	-	-	-	-	-	-	-	+	-	-	-	-	-	-	-	+	-	-
33009-19-S010	PRJDB15501	SAMD00591182	DRR456589	2019-07-05	male	43y	blood	bone infection	West Japan	Okayama	SC10	30	2	2	2	2	6	3	2	30	t012	-	-	+	-	-	-	-	+	+	-	+	-	-	-	+	+	+	-	-	-	-	-	+	-	+	-	-	-
33009-19-S011	PRJDB15501	SAMD00591183	DRR456590	2019-07-31	male	89y	blood	unknown	West Japan	Okayama	SC8	5	1	4	1	4	12	1	10	5	ND	IIa	-	-	-	+	-	-	+	+	-	+	-	-	+	+	+	-	+	-	-	-	-	-	-	-	+	-	-
33009-19-S012	PRJDB15501	SAMD00591184	DRR456591	2019-08-06	female	49y	blood	device-related infection	West Japan	Okayama	SC7	72	1	4	1	8	4	4	3	72	t7820	-	-	-	-	-	-	-	-	+	-	-	-	-	-	+	+	+	-	-	-	-	-	-	-	-	+	-	-
33009-19-S014	PRJDB15501	SAMD00591185	DRR456592	2019-08-15	male	88y	blood	unknown	West Japan	Okayama	SC8	7484	1	4	284	4	12	1	10	5	t002	IIa	-	-	-	+	-	-	+	+	-	-	-	-	+	-	-	-	+	-	-	-	-	-	-	-	+	-	-
33009-19-S015	PRJDB15501	SAMD00591186	DRR456593	2019-08-19	male	70y	blood	unknown	West Japan	Okayama	SC3	8	3	3	1	1	4	4	3	8	t723	-	-	-	-	-	-	-	-	-	-	-	-	-	-	-	-	-	+	-	-	-	-	-	-	-	+	-	-
33009-19-S016	PRJDB15501	SAMD00591187	DRR456594	2019-08-26	female	54y	blood	bone infection	West Japan	Okayama	SC8	7484	1	4	284	4	12	1	10	5	t002	IIa	-	-	-	-	-	-	-	+	-	-	-	-	-	-	-	+	+	-	-	-	-	-	-	-	+	-	-
33009-19-S017	PRJDB15501	SAMD00591188	DRR456595	2019-08-29	female	9y	blood	device-related infection	West Japan	Okayama	SC3	8	3	3	1	1	4	4	3	8	t1767	-	-	-	-	-	-	-	-	-	-	-	-	-	-	-	-	-	-	-	-	-	-	-	-	-	+	-	-
33009-19-S019	PRJDB15501	SAMD00591189	DRR456596	2019-09-09	male	74y	blood	skin and soft tissue infection	West Japan	Okayama	SC9	45	10	14	8	6	10	3	2	45	t330	-	-	+	-	-	-	-	-	+	-	+	-	-	-	+	+	+	-	-	-	-	-	-	-	+	+	-	-
33009-19-S020	PRJDB15501	SAMD00591190	DRR456597	2019-09-25	male	53y	blood	skin and soft tissue infection	West Japan	Okayama	SC7	7486	12	4	601	4	12	1	3	6	t2849	-	-	+	-	+	-	-	-	-	-	-	-	-	+	-	-	-	-	-	-	-	-	-	-	-	+	-	-
33009-19-S021	PRJDB15501	SAMD00591191	DRR456598	2019-10-11	male	87y	blood	unknown	West Japan	Okayama	SC1	7487	1	1	919	1	1	1	1	1	t1784	IVa	-	+	-	-	-	-	-	-	+	-	-	+	-	-	-	-	-	+	-	-	-	-	-	-	+	-	-
33009-19-S022	PRJDB15501	SAMD00591192	DRR456599	2019-10-11	female	54y	blood	device-related infection	West Japan	Okayama	SC2	188	3	1	1	8	1	1	1	188	t416	-	-	-	-	-	-	-	-	-	-	-	-	-	-	-	-	-	-	-	-	-	-	-	-	-	+	-	-
33009-19-S024	PRJDB15501	SAMD00591193	DRR456600	2019-11-03	female	44y	blood	device-related infection	West Japan	Okayama	SC4	582	13	13	1	1	12	10	13	15	t803	-	-	-	-	-	-	-	-	-	-	-	-	-	-	-	-	-	-	-	-	-	-	-	-	-	+	-	-
33009-19-S025	PRJDB15501	SAMD00591194	DRR456601	2019-11-09	female	86y	blood	bone infection	West Japan	Okayama	SC9	45	10	14	8	6	10	3	2	45	t065	-	-	-	-	-	-	-	-	+	-	+	-	-	-	+	+	+	-	-	-	-	-	-	-	+	+	-	-
33009-19-S026	PRJDB15501	SAMD00591195	DRR456602	2019-11-11	female	17y	blood	bone infection	West Japan	Okayama	SC4	15	13	13	1	1	12	11	13	15	t3345	-	-	-	-	-	-	-	-	-	-	-	-	-	-	-	-	-	-	-	-	-	-	-	-	-	+	-	-
33009-19-S028	PRJDB15501	SAMD00591196	DRR456603	2019-11-14	male	46y	blood	device-related infection	West Japan	Okayama	SC4	582	13	13	1	1	12	10	13	15	t803	-	-	-	-	-	-	-	-	-	-	-	-	-	-	-	-	-	-	-	-	-	-	-	-	-	+	-	-
33009-19-S030	PRJDB15501	SAMD00591197	DRR456604	2019-11-21	male	75y	blood	unknown	West Japan	Okayama	SC7	6	12	4	1	4	12	1	3	6	t2360	-	-	+	-	-	-	-	-	-	-	-	-	-	-	-	-	-	-	-	-	-	-	-	-	-	+	-	-
33009-19-S032	PRJDB15501	SAMD00591198	DRR456605	2019-11-30	male	52y	blood	device-related infection	West Japan	Okayama	SC11	398	3	35	19	2	20	26	39	398	t2876, t2383	-	-	-	-	-	-	-	-	-	-	-	-	-	-	-	-	-	-	-	-	-	-	-	-	-	-	-	-
33009-19-S033	PRJDB15501	SAMD00591199	DRR456606	2019-12-02	male	18y	blood	skin and soft tissue infection	West Japan	Okayama	SC6	97	3	1	1	1	1	5	3	97	t267	-	-	-	-	-	-	-	-	-	-	-	-	-	-	-	-	-	-	-	-	-	-	-	-	-	+	-	-
33009-19-S035	PRJDB15501	SAMD00591200	DRR456607	2019-12-08	female	1y	blood	device-related infection	West Japan	Okayama	SC3	8	3	3	1	1	4	4	3	8	t5071	IVh	-	-	-	-	-	-	-	-	-	-	-	-	-	-	-	-	+	-	-	-	-	-	-	-	+	-	-
33009-19-S037	PRJDB15501	SAMD00591201	DRR456608	2019-12-31	female	42y	blood	unknown	West Japan	Okayama	SC3	8	3	3	1	1	4	4	3	8	t1767	-	-	-	-	-	-	-	-	-	-	-	-	-	-	-	-	-	+	-	-	-	-	-	-	-	+	-	-
33009-19-S038	PRJDB15501	SAMD00591202	DRR456609	2020-01-09	female	72y	blood	device-related infection	West Japan	Okayama	SC3	380	3	3	61	42	4	4	3	8	t12889	IVk	-	-	-	-	-	-	-	-	-	-	-	-	-	-	-	-	-	-	-	-	-	-	-	-	+	-	-
33009-19-S039	PRJDB15501	SAMD00591203	DRR456610	2020-01-16	male	68y	blood	pneumonia	West Japan	Okayama	SC3	3405	3	3	514	1	4	4	3	8	t4133	-	-	-	-	-	-	-	-	-	-	-	-	-	-	-	-	-	+	-	-	-	-	-	-	-	+	-	-
33009-19-S040	PRJDB15501	SAMD00591204	DRR456611	2020-01-16	male	63y	blood	skin and soft tissue infection	West Japan	Okayama	SC3	3405	3	3	514	1	4	4	3	8	t4133	-	-	-	-	-	-	-	-	-	-	-	-	-	-	-	-	-	+	-	-	-	-	-	-	-	+	-	-
33009-19-S041	PRJDB15501	SAMD00591205	DRR456612, DRR457479	2020-01-26	female	98y	blood	unknown	West Japan	Okayama	SC8	5	1	4	1	4	12	1	10	5	t179	-	-	+	-	-	-	-	-	+	-	-	-	-	-	+	+	+	-	-	-	-	-	-	-	-	+	-	-
33009-19-S042	PRJDB15501	SAMD00591206	DRR456613	2020-02-07	male	82y	blood	pneumonia	West Japan	Okayama	SC3	7487	3	3	1	1	4	820	3	8	t008	-	-	-	+	-	-	-	-	-	-	-	-	+	-	-	-	-	+	+	-	-	-	-	-	-	+	-	-
33009-19-S043	PRJDB15501	SAMD00591207	DRR456614, DRR457480	2020-02-25	female	79y	blood	bone infection	West Japan	Okayama	SC8	5	1	4	1	4	12	1	10	5	t179	IVj	-	-	-	-	+	-	-	-	-	+	+	-	-	+	-	+	+	-	+	-	-	-	-	-	+	-	-
33009-19-S046	PRJDB15501	SAMD00591208	DRR456615	2020-03-25	male	81y	blood	unknown	West Japan	Okayama	SC3	8	3	3	1	1	4	4	3	8	t460	IVl	-	-	-	-	-	-	-	-	-	-	-	-	-	-	-	-	+	-	-	-	-	-	-	-	+	-	-
33009-19-S050	PRJDB15501	SAMD00591209	DRR456616	2020-04-03	female	85y	blood	unknown	West Japan	Okayama	SC7	88	22	1	14	23	12	4	31	88	t186	-	-	-	-	-	-	-	-	-	-	-	-	-	-	-	-	-	-	-	-	-	-	-	-	-	+	-	-
33009-19-S052	PRJDB15501	SAMD00591210	DRR456617	2020-04-11	male	84y	blood	unknown	West Japan	Okayama	SC9	45	10	14	8	6	10	3	2	45	t065	-	-	-	-	+	-	-	+	+	-	+	-	-	+	+	+	+	-	-	-	-	-	-	-	+	+	-	-
33009-19-S053	PRJDB15501	SAMD00591211	DRR456618	2020-04-21	male	69y	blood	bone infection	West Japan	Okayama	SC7	672	4	3	1	1	11	72	11	672	t1309	-	-	-	-	+	-	-	-	+	-	+	-	-	+	+	+	+	-	-	-	-	-	-	-	-	+	-	-
33009-19-S056	PRJDB15501	SAMD00591212	DRR456619	2020-05-27	male	62y	blood	unknown	West Japan	Okayama	SC3	8	3	3	1	1	4	4	3	8	t13432	IVj	-	-	-	-	-	-	-	-	-	-	-	-	-	-	-	-	+	-	-	-	-	-	-	-	+	-	-
33009-19-S057	PRJDB15501	SAMD00591213	DRR456620	2020-06-08	male	84y	blood	unknown	West Japan	Okayama	SC2	188	3	1	1	8	1	1	1	188	t7165	-	-	-	-	-	-	-	-	-	-	-	-	-	-	-	-	-	-	-	-	-	-	-	-	-	+	-	-
33009-19-S058	PRJDB15501	SAMD00591214	DRR456621	2020-06-22	male	70y	blood	device-related infection	West Japan	Okayama	SC12	121	6	5	6	2	7	14	5	121	t5110	V	-	-	-	-	-	-	-	+	-	+	-	-	-	+	+	+	-	-	-	-	-	+	-	-	+	+	+
33009-19-S059	PRJDB15501	SAMD00591215	DRR456622	2020-06-26	male	74y	blood	bone infection	West Japan	Okayama	SC8	5	1	4	1	4	12	1	10	5	ND	-	-	-	-	-	-	-	-	+	-	+	-	-	-	+	+	+	+	-	-	-	-	-	-	-	+	-	-
33009-19-S060	PRJDB15501	SAMD00591216	DRR456623, DRR457481	2020-06-30	female	75y	blood	skin and soft tissue infection	West Japan	Okayama	SC11	398	3	35	19	2	20	26	39	398	t18045	-	-	-	-	-	-	-	-	-	-	-	-	-	-	-	-	-	-	-	-	-	-	-	-	-	-	-	-
33018-19-S002	PRJDB15501	SAMD00591217	DRR456624	2019-12-23	female	92y	blood	device-related infection	West Japan	Okayama	SC2	188	3	1	1	8	1	1	1	188	t13500	-	-	-	-	-	-	-	-	-	-	-	-	-	-	-	-	-	-	-	-	-	-	-	-	-	+	-	-
33018-19-S004	PRJDB15501	SAMD00591218	DRR456625	2020-01-16	male	86y	blood	device-related infection	West Japan	Okayama	SC1	1	1	1	1	1	1	1	1	1	t1784	IVa	-	+	-	-	-	-	-	-	+	-	-	+	-	-	-	-	-	+	-	-	-	-	-	-	+	-	-
33018-19-S005	PRJDB15501	SAMD00591219	DRR456626	2020-03-16	male	75y	blood	urinary-tract infection	West Japan	Okayama	SC1	1	1	1	1	1	1	1	1	1	t1784	IVa	-	+	-	-	-	-	-	-	+	-	-	+	-	-	-	-	-	+	-	-	-	-	-	-	+	-	-
34003-19-S001	PRJDB15501	SAMD00591220	DRR456627	2019-08-04	female	60y	blood	device-related infection	West Japan	Hiroshima	SC3	8	3	3	1	1	4	4	3	8	t4133	IVl	-	-	-	+	-	-	+	-	-	-	-	-	+	-	-	-	+	-	-	-	-	-	-	-	+	-	-
34003-19-S002	PRJDB15501	SAMD00591221	DRR456628, DRR546382	2019-08-19	female	78ｙ	blood	skin and soft tissue infection	West Japan	Hiroshima	SC8	764	1	136	1	4	12	1	10	5	t002	IIa	-	-	+	-	-	-	-	+	-	+	-	-	-	+	+	+	-	-	-	-	-	-	-	-	+	-	-
34003-19-S004	PRJDB15501	SAMD00591222	DRR456629	2019-08-29	male	85y	blood	unknown	West Japan	Hiroshima	SC8	5	1	4	1	4	12	1	10	5	t8461	-	-	-	-	-	-	-	-	+	-	+	-	-	-	+	+	+	+	-	-	-	-	-	-	-	+	-	-
34003-19-S005	PRJDB15501	SAMD00591223	DRR456630, DRR546383	2019-12-17	female	60y	blood	pneumonia	West Japan	Hiroshima	SC8	764	1	136	1	4	12	1	10	5	ND	IIa	-	-	+	-	-	-	-	+	-	+	-	-	-	+	+	+	-	-	-	-	-	-	-	-	+	-	-
34003-19-S007	PRJDB15501	SAMD00591224	DRR456631	2019-09-18	female	81y	blood	urinary-tract infection	West Japan	Hiroshima	SC1	1	1	1	1	1	1	1	1	1	t127	-	-	+	-	-	-	-	-	-	+	-	-	-	-	-	-	-	-	+	-	-	-	-	-	-	+	-	-
34003-19-S008	PRJDB15501	SAMD00591225	DRR456632	2020-02-13	female	86y	blood	unknown	West Japan	Hiroshima	SC5	20	4	9	1	8	1	10	8	20	t3277	-	-	-	-	-	-	-	-	+	-	+	-	-	-	+	-	-	-	-	-	-	-	-	-	-	+	+	-
34003-19-S009	PRJDB15501	SAMD00591226	DRR456633	2019-09-19	female	74y	blood	device-related infection	West Japan	Hiroshima	SC3	7488	3	1059	1	1	4	4	3	8	t1767	IVl	-	-	-	+	-	-	+	-	-	-	-	-	+	-	-	-	+	-	-	-	-	-	-	-	+	-	-
34003-19-S010	PRJDB15501	SAMD00591227	DRR456634	2020-02-17	male	87ｙ	blood	pneumonia	West Japan	Hiroshima	SC2	188	3	1	1	8	1	1	1	188	t189	-	-	-	-	-	-	-	-	-	-	-	-	-	-	-	-	-	-	-	-	-	-	-	-	-	+	-	-
34003-19-S012	PRJDB15501	SAMD00591228	DRR456635	2020-02-22	female	95ｙ	blood	pneumonia	West Japan	Hiroshima	SC3	8	3	3	1	1	4	4	3	8	t5071	IVj	-	-	-	-	-	-	-	-	-	-	-	-	-	-	-	-	+	-	-	-	-	-	-	-	+	-	-
34003-19-S013	PRJDB15501	SAMD00591229	DRR456636	2019-09-30	male	93ｙ	blood	pneumonia	West Japan	Hiroshima	SC3	2650	302	3	1	1	4	4	3	8	ND	IVl	-	-	-	+	-	-	+	-	-	-	-	-	+	-	-	-	-	-	-	-	-	-	-	-	+	-	-
34003-19-S014	PRJDB15501	SAMD00591230	DRR456637	2019-10-01	female	0y 1m	blood	unknown	West Japan	Hiroshima	SC3	8	3	3	1	1	4	4	3	8	t5071	IVj	-	-	-	-	-	-	-	-	-	-	-	-	-	-	-	-	+	-	-	-	-	-	-	-	+	-	-
34026-19-S001	PRJDB15501	SAMD00591231	DRR456638	2020-02-29	male	89y	blood	device-related infection	West Japan	Hiroshima	SC9	508	10	40	8	6	10	3	2	508	t630	-	-	-	-	-	-	-	-	+	-	+	-	-	-	+	+	+	-	-	-	-	-	-	-	+	+	-	-
34026-19-S002	PRJDB15501	SAMD00591232	DRR456639	2020-03-01	male	81y	blood	device-related infection	West Japan	Hiroshima	SC12	121	6	5	6	2	7	14	5	121	t5110	V	-	-	-	-	-	-	-	+	-	+	-	-	-	+	+	+	-	-	-	-	-	+	-	-	+	+	+
34044-19-S001	PRJDB15501	SAMD00591233	DRR456640	2019-09-09	male	86y	blood	pneumonia	West Japan	Hiroshima	SC3	380	3	3	61	42	4	4	3	8	t9121	IVc	-	-	-	-	-	-	-	-	-	-	-	-	-	-	-	-	-	-	-	-	-	-	-	-	+	-	-
34044-19-S002	PRJDB15501	SAMD00591234	DRR456641	2019-09-24	male	85y	blood	device-related infection	West Japan	Hiroshima	SC3	8	3	3	1	1	4	4	3	8	t1767	-	-	-	-	-	-	-	-	-	-	-	-	-	-	-	-	-	+	-	-	-	-	-	-	-	+	-	-
34044-19-S004	PRJDB15501	SAMD00591235	DRR456642	2019-09-26	male	85y	blood	device-related infection	West Japan	Hiroshima	SC3	8	3	3	1	1	4	4	3	8	t1767	-	-	-	-	-	-	-	-	-	-	-	-	-	-	-	-	-	+	-	-	-	-	-	-	-	+	-	-
34044-19-S006	PRJDB15501	SAMD00591236	DRR456643	2019-11-13	male	80y	blood	others	West Japan	Hiroshima	SC8	5	1	4	1	4	12	1	10	5	t062	IIa	-	-	-	+	-	-	+	+	-	-	-	-	+	+	-	+	-	-	-	-	-	-	-	-	+	-	-
34044-19-S007	PRJDB15501	SAMD00591237	DRR456644, DRR457482	2020-01-16	male	90y	blood	pneumonia	West Japan	Hiroshima	SC9	45	10	14	8	6	10	3	2	45	t065	-	-	-	-	-	-	-	-	+	-	+	-	-	-	+	+	+	-	-	-	-	-	-	-	+	+	-	-
34044-19-S008	PRJDB15501	SAMD00591238	DRR456645	2020-02-01	male	80y	blood	urinary-tract infection	West Japan	Hiroshima	SC3	8	3	3	1	1	4	4	3	8	t2698	-	-	-	-	-	-	-	-	.	-	-	-	-	-	-	-	-	-	-	-	-	-	-	-	-	+	-	-
34044-19-S011	PRJDB15501	SAMD00591239	DRR456646	2020-02-28	female	75y	blood	device-related infection	West Japan	Hiroshima	SC12	121	6	5	6	2	7	14	5	121	t5110	XIV	-	-	-	-	-	-	-	+	-	+	-	-	-	+	+	+	-	-	-	-	-	+	-	-	+	+	+
34044-19-S012	PRJDB15501	SAMD00591240	DRR456647	2020-03-02	male	12y	blood	bone infection	West Japan	Hiroshima	SC9	508	10	40	8	6	10	3	2	508	t133	-	-	-	-	-	-	-	-	+	-	+	-	-	-	+	+	+	-	-	-	-	-	-	-	+	+	-	-
34044-19-S014	PRJDB15501	SAMD00591241	DRR456648, DRR546384	2020-03-13	female	65y	blood	skin and soft tissue infection	West Japan	Hiroshima	SC8	764	1	136	1	4	12	1	10	5	t002	IIa	-	-	+	-	-	-	-	+	-	+	-	-	-	+	+	+	-	-	-	-	-	-	-	-	+	-	-
34044-19-S015	PRJDB15501	SAMD00591242	DRR456649	2020-03-23	male	73y	blood	skin and soft tissue infection	West Japan	Hiroshima	SC8	5	1	4	1	4	12	1	10	5	ND	-	-	+	-	-	-	-	-	+	-	+	-	-	-	+	+	+	-	-	-	-	-	-	-	-	+	-	-
34044-19-S017	PRJDB15501	SAMD00591243	DRR456650, DRR457483	2020-05-08	male	43y	blood	skin and soft tissue infection	West Japan	Hiroshima	SC7	72	1	4	1	8	4	4	3	72	t3092	V	-	-	-	+	-	-	+	+	-	+	-	-	+	+	+	+	-	-	-	-	-	-	-	+	+	-	-
34044-19-S018	PRJDB15501	SAMD00591244	DRR456651	2020-05-25	male	45y	blood	others	West Japan	Hiroshima	SC7	72	1	4	1	8	4	4	3	72	t3092	V	-	-	-	+	-	-	+	+	-	+	-	-	+	+	+	+	-	-	-	-	-	-	-	+	+	-	-
34044-19-S020	PRJDB15501	SAMD00591245	DRR456652	2020-06-02	female	76y	blood	device-related infection	West Japan	Hiroshima	SC3	8	3	3	1	1	4	4	3	8	t689	IVj	-	-	-	-	-	-	-	-	-	-	-	-	-	-	-	-	+	-	-	-	-	-	-	-	+	-	-
34044-19-S022	PRJDB15501	SAMD00591246	DRR456653	2020-06-27	female	89y	blood	pneumonia	West Japan	Hiroshima	SC9	7490	10	14	8	6	893	3	2	45	t065	-	-	-	-	+	-	-	+	-	-	+	-	-	+	+	-	+	-	-	-	-	-	-	-	-	+	-	-
35012-19-S001B	PRJDB15501	SAMD00591247	DRR456654	2019-09-17	male	73y	blood	intra-abdominal infection	West Japan	Yamaguchi	SC4	15	13	13	1	1	12	11	13	15	t491	-	-	-	-	-	-	-	-	-	-	-	-	-	-	-	-	-	-	-	-	-	-	-	-	-	+	-	-
35012-19-S002	PRJDB15501	SAMD00591248	DRR456655	2020-01-09	male	94y	blood	pneumonia	West Japan	Yamaguchi	SC3	8	3	3	1	1	4	4	3	8	ND	I	-	-	-	-	-	-	-	-	-	-	-	-	-	-	-	-	-	-	-	-	-	-	-	-	+	-	-
35012-19-S003	PRJDB15501	SAMD00591249	DRR456656	2020-03-02	female	67y	blood	device-related infection	West Japan	Yamaguchi	SC6	7491	3	1	1	78	1	5	3	97	t224	-	-	-	-	-	-	-	-	-	-	-	-	-	-	-	-	-	-	-	-	-	-	-	-	-	+	-	-
35012-19-S004	PRJDB15501	SAMD00591250	DRR456657	2020-03-25	male	79y	blood	others	West Japan	Yamaguchi	SC3	8	3	3	1	1	4	4	3	8	t1767	IVl	-	-	-	+	-	-	+	-	-	-	-	-	+	-	-	-	+	-	-	-	-	-	-	-	+	-	-
35012-19-S005	PRJDB15501	SAMD00591251	DRR456658, DRR546385	2020-06-09	female	57y	blood	urinary-tract infection	West Japan	Yamaguchi	SC8	764	1	136	1	4	12	1	10	5	t111	IIa	-	-	+	-	-	-	-	+	-	+	-	-	-	+	+	+	-	-	-	-	-	-	-	-	+	-	-
35801-19-S002	PRJDB15501	SAMD00591252	DRR456659	2019-05-03	male	85y	blood	device-related infection	West Japan	Yamaguchi	SC1	2725	1	1	41	1	1	1	1	1	t7744	IVa	-	+	-	-	-	-	-	-	+	-	-	+	-	-	-	-	-	+	-	-	-	-	-	-	+	-	-
35801-19-S003	PRJDB15501	SAMD00591253	DRR456660	2019-08-14	male	87y	blood	unknown	West Japan	Yamaguchi	SC4	15	13	13	1	1	12	11	13	15	t3345	-	-	-	-	-	-	-	-	-	-	-	-	-	-	-	-	-	-	-	-	-	-	-	-	-	+	-	-
35801-19-S004	PRJDB15501	SAMD00591254	DRR456661	2019-10-10	male	79y	blood	unknown	West Japan	Yamaguchi	SC3	8	3	3	1	1	4	4	3	8	t1767	IVl	-	-	-	-	-	-	-	-	-	-	-	-	-	-	-	-	-	-	-	-	-	-	-	-	+	-	-
35801-19-S005	PRJDB15501	SAMD00591255	DRR456662	2019-10-24	female	83y	blood	device-related infection	West Japan	Yamaguchi	SC3	8	3	3	1	1	4	4	3	8	t5071	IVj	-	-	-	-	-	-	-	-	-	-	-	-	-	-	-	-	+	-	-	-	-	-	-	-	+	-	-
35801-19-S006	PRJDB15501	SAMD00591256	DRR456663	2020-01-16	male	88y	blood	unknown	West Japan	Yamaguchi	SC3	8	3	3	1	1	4	4	3	8	t1767	IVl	-	-	-	+	-	-	+	-	-	-	-	-	+	-	-	-	+	-	-	-	-	-	-	-	+	-	-
35801-19-S007	PRJDB15501	SAMD00591257	DRR456664	2020-01-27	male	82y	blood	device-related infection	West Japan	Yamaguchi	SC2	188	3	1	1	8	1	1	1	188	t189	-	-	-	-	-	-	-	-	-	-	-	-	-	-	-	-	-	-	-	-	-	-	-	-	-	+	-	-
35801-19-S008	PRJDB15501	SAMD00591258	DRR456665	2020-01-31	female	92y	blood	skin and soft tissue infection	West Japan	Yamaguchi	SC3	8	3	3	1	1	4	4	3	8	t008	IVa	-	-	-	-	-	-	-	-	-	-	-	-	-	-	-	-	-	-	-	-	-	-	-	-	+	-	-
35801-19-S009	PRJDB15501	SAMD00591259	DRR456666	2020-03-05	female	76y	blood	bone infection	West Japan	Yamaguchi	SC1	1	1	1	1	1	1	1	1	1	t1784	IVa	-	+	-	-	-	-	-	-	+	-	-	+	-	-	-	-	-	+	-	-	-	-	-	-	+	-	-
35801-19-S010	PRJDB15501	SAMD00591260	DRR456667	2020-04-16	male	88y	blood	unknown	West Japan	Yamaguchi	SC7	7	5	4	1	4	4	6	3	7	t796	-	-	-	-	-	-	-	-	-	-	-	-	-	-	-	-	-	+	-	-	-	-	-	-	-	+	-	-
35801-19-S011	PRJDB15501	SAMD00591261	DRR456668	2020-06-14	female	83y	blood	unknown	West Japan	Yamaguchi	SC7	7	5	4	1	4	4	6	3	7	t796	-	-	-	-	-	-	-	-	-	-	-	-	-	-	-	-	-	+	-	-	-	-	-	-	-	+	-	-
37010-19-S001	PRJDB15501	SAMD00591262	DRR456669	2019-06-24	male	60y	blood	unknown	West Japan	Kagawa	SC3	8	3	3	1	1	4	4	3	8	t211	-	-	-	-	-	-	-	-	-	-	-	-	-	-	-	-	-	+	-	-	-	-	-	-	-	+	-	-
37010-19-S002	PRJDB15501	SAMD00591263	DRR456670	2019-07-12	female	2y	blood	unknown	West Japan	Kagawa	SC4	15	13	13	1	1	12	11	13	15	t094	-	-	-	-	-	-	-	-	-	-	-	-	-	-	-	-	-	-	-	-	-	-	-	-	-	+	-	-
37010-19-S003	PRJDB15501	SAMD00591264	DRR456671	2019-08-28	male	26y	blood	infectious endocarditis	West Japan	Kagawa	SC3	8	3	3	1	1	4	4	3	8	t008	-	-	-	-	-	-	-	-	-	-	-	-	-	-	-	-	-	+	-	-	-	-	-	-	-	+	-	-
37010-19-S004	PRJDB15501	SAMD00591265	DRR456672	2019-09-23	male	6m	blood	device-related infection	West Japan	Kagawa	SC8	5	1	4	1	4	12	1	10	5	t1107	-	-	-	-	-	-	-	-	+	-	+	-	-	-	+	+	+	+	-	-	-	-	-	-	-	+	-	-
37010-19-S005	PRJDB15501	SAMD00591266	DRR456673	2019-10-12	male	5y	blood	device-related infection	West Japan	Kagawa	SC3	-	3	864?	1	1	894	4	3	8	t5071	IVj	-	-	-	-	-	-	-	-	-	-	-	-	-	-	-	-	+	-	-	-	-	-	-	-	+	-	-
37010-19-S006	PRJDB15501	SAMD00591267	DRR456674	2019-10-25	male	82y	blood	others	West Japan	Kagawa	SC6	97	3	1	1	1	1	5	3	97	t359	-	-	-	-	-	-	-	-	-	-	-	-	-	-	-	-	-	-	-	-	-	-	-	-	-	+	-	-
37010-19-S007	PRJDB15501	SAMD00591268	DRR456675	2019-10-31	male	89y	blood	unknown	West Japan	Kagawa	SC3	630	12	3	1	1	4	4	3	8	t377	-	-	-	-	-	-	-	-	-	-	-	-	-	-	-	-	-	-	-	-	-	-	-	-	-	+	-	-
37010-19-S008	PRJDB15501	SAMD00591269	DRR456676	2019-11-11	male	89y	blood	skin and soft tissue infection	West Japan	Kagawa	SC3	630	12	3	1	1	4	4	3	8	t4047	-	-	-	-	-	-	-	-	-	-	-	-	-	-	-	-	-	-	-	-	-	-	-	-	-	+	-	-
37010-19-S009	PRJDB15501	SAMD00591270	DRR456677	2019-12-17	male	72y	blood	unknown	West Japan	Kagawa	SC5	1281	4	168	1	8	1	10	8	239	t164	-	-	-	-	-	-	-	-	+	-	+	-	-	-	+	+	+	-	-	-	-	-	-	-	-	+	+	-
37010-19-S015	PRJDB15501	SAMD00591271	DRR456678	2020-04-03	female	86y	blood	device-related infection	West Japan	Kagawa	SC1	2725	1	1	41	1	1	1	1	1	t2207	IVa	-	+	-	-	-	-	-	-	+	-	-	+	-	-	-	-	-	+	-	-	-	-	-	-	+	-	-
37010-19-S016	PRJDB15501	SAMD00591272	DRR456679, DRR546386	2020-05-16	male	87y	blood	device-related infection	West Japan	Kagawa	SC8	764	1	136	1	4	12	1	10	5	t002	IIa	-	-	+	-	-	-	-	+	-	+	-	-	-	+	+	+	-	-	-	-	-	-	-	-	+	-	-
37010-19-S017	PRJDB15501	SAMD00591273	DRR456680	2020-08-14	female	95y	blood	unknown	West Japan	Kagawa	SC1	1	1	1	1	1	1	1	1	1	t1784	IVa	-	+	-	-	-	-	-	-	+	-	-	+	-	-	-	-	-	+	-	-	-	-	-	-	+	-	-
39007-19-S001	PRJDB15501	SAMD00591274	DRR456681	2019-05-02	male	84y	blood	pneumonia	West Japan	Kochi	SC13	59	19	23	15	2	19	20	15	59	t216	-	-	-	-	-	-	-	-	-	-	-	-	-	-	-	-	-	-	-	-	-	-	-	-	-	+	+	-
39007-19-S002	PRJDB15501	SAMD00591275	DRR456682	2019-05-08	female	83ｙ	blood	others	West Japan	Kochi	SC8	5	1	4	1	4	12	1	10	5	t002	II	-	-	-	+	-	-	-	+	-	+	-	-	+	+	+	+	-	-	-	-	-	-	-	-	+	-	-
39007-19-S004	PRJDB15501	SAMD00591276	DRR456683	2019-06-15	male	72ｙ	blood	device-related infection	West Japan	Kochi	SC3	8	3	3	1	1	4	4	3	8	t5071	IVj	-	-	-	-	-	-	-	-	-	-	-	-	-	-	-	-	-	-	-	-	-	-	-	-	+	-	-
39007-19-S005	PRJDB15501	SAMD00591277	DRR456684, DRR457484	2019-07-12	female	68ｙ	blood	unknown	West Japan	Kochi	SC3	7492	878	3	1	1	4	4	3	8	t3386	-	-	-	-	-	-	-	-	-	-	-	-	-	-	-	-	-	-	-	-	-	-	-	-	-	+	-	-
39007-19-S007	PRJDB15501	SAMD00591278	DRR456685, DRR457485	2019-09-06	female	91ｙ	blood	device-related infection	West Japan	Kochi	SC1	1	1	1	1	1	1	1	1	1	t1784	IVa	-	+	-	-	-	-	-	-	+	-	-	+	-	-	-	-	-	+	-	-	-	-	-	-	+	-	-
39007-19-S008	PRJDB15501	SAMD00591279	DRR456686	2019-09-13	male	39y	blood	others	West Japan	Kochi	SC8	5	1	4	1	4	12	1	10	5	t8337	-	-	-	-	-	-	-	-	+	-	+	-	-	-	+	+	+	-	-	-	-	-	-	-	-	+	-	-
39007-19-S009	PRJDB15501	SAMD00591280	DRR456687	2020-06-01	male	80ｙ	blood	device-related infection	West Japan	Kochi	SC3	8	3	3	1	1	4	4	3	8	t530	II	-	-	-	-	-	-	-	-	-	-	-	-	-	-	-	-	-	-	-	-	-	-	-	-	+	-	-
39007-19-S010	PRJDB15501	SAMD00591281	DRR456688	2020-06-13	female	91ｙ	blood	pneumonia	West Japan	Kochi	SC7	6	12	4	1	4	12	1	3	6	t4793	-	-	+	-	-	-	-	-	-	-	-	-	-	-	-	-	-	-	-	-	-	-	-	-	-	+	-	-
40045-19-S001	PRJDB15501	SAMD00591282	DRR456689	2019-04-08	male	81y	blood	pneumonia	West Japan	Fukuoka	SC1	2725	1	1	41	1	1	1	1	1	t1784	IVa	-	+	-	-	-	-	-	-	+	-	-	+	-	-	-	-	-	+	-	-	-	-	-	-	+	-	-
40045-19-S002	PRJDB15501	SAMD00591283	DRR456690	2019-04-22	male	64y	blood	others	West Japan	Fukuoka	SC3	8	3	3	1	1	4	4	3	8	t1767	IVl	-	-	-	+	-	-	+	-	-	-	-	-	+	-	-	-	-	-	-	-	-	-	-	-	+	-	-
40045-19-S003	PRJDB15501	SAMD00591284	DRR456691	2019-06-01	female	1y	blood	unknown	West Japan	Fukuoka	SC7	12	1	3	1	8	11	5	11	12	t771	-	-	-	-	-	-	-	-	-	-	-	-	-	-	-	-	-	+	-	-	-	-	-	-	-	+	-	+
40045-19-S004	PRJDB15501	SAMD00591285	DRR456692	2019-06-07	male	77y	blood	pneumonia	West Japan	Fukuoka		22	7	6	1	5	8	8	6	22	t005	IVa	-	-	-	-	-	-	+	+	-	+	-	-	-	+	+	+	-	-	-	-	-	-	-	-	+	-	-
40045-19-S005	PRJDB15501	SAMD00591286	DRR456693	2019-07-25	male	2m	blood	unknown	West Japan	Fukuoka	SC8	5	1	4	1	4	12	1	10	5	t002	II	-	-	-	+	-	-	+	+	-	+	-	-	+	+	+	+	-	-	-	-	-	-	-	-	+	-	-
40045-19-S006	PRJDB15501	SAMD00591287	DRR456694	2019-08-13	female	84y	blood	unknown	West Japan	Fukuoka	SC9	7493	10	40	8	6	10	3	72	508	t050	-	-	-	-	+	-	-	+	+	-	+	-	-	+	+	+	+	-	-	-	-	-	-	-	+	+	-	-
40045-19-S007	PRJDB15501	SAMD00591288	DRR456695	2019-10-28	female	75y	blood	skin and soft tissue infection	West Japan	Fukuoka	SC1	2725	1	1	41	1	1	1	1	1	t1784	IVa	-	+	-	-	-	-	-	-	+	-	-	-	-	-	-	-	-	+	-	-	-	-	-	-	+	-	-
40045-19-S008	PRJDB15501	SAMD00591289	DRR456696	2019-12-23	female	70y	blood	skin and soft tissue infection	West Japan	Fukuoka	SC3	8	3	3	1	1	4	4	3	8	t1767	I	-	-	-	-	-	-	-	-	-	-	-	-	-	-	-	-	+	-	-	-	-	-	-	-	+	-	-
40045-19-S009	PRJDB15501	SAMD00591290	DRR456697	2020-01-01	male	65y	blood	bone infection	West Japan	Fukuoka	SC4	15	13	13	1	1	12	11	13	15	t3345	-	-	-	-	-	-	-	-	-	-	-	-	-	-	-	-	-	-	-	-	-	-	-	-	-	+	-	-
40045-19-S010	PRJDB15501	SAMD00591291	DRR456698	2020-01-02	female	74y	blood	skin and soft tissue infection	West Japan	Fukuoka	SC7	6	12	4	1	4	12	1	3	6	t701	-	-	+	-	-	-	-	-	-	-	-	-	-	-	-	-	-	-	-	-	-	-	-	-	-	+	-	-
40045-19-S011	PRJDB15501	SAMD00591292	DRR456699, DRR546387	2020-01-15	female	88y	blood	device-related infection	West Japan	Fukuoka	SC8	764	1	136	1	4	12	1	10	5	t2302	IIa	-	-	+	-	-	-	-	+	-	+	-	+	-	+	+	+	-	+	-	-	-	-	-	-	+	-	-
40045-19-S012	PRJDB15501	SAMD00591293	DRR456700	2020-01-21	female	83y	blood	unknown	West Japan	Fukuoka	SC2	188	3	1	1	8	1	1	1	188	t6367	-	-	-	-	-	-	-	-	-	-	-	-	-	-	-	-	-	-	-	-	-	-	-	-	-	+	-	-
40045-19-S013	PRJDB15501	SAMD00591294	DRR456701	2020-02-07	male	69y	blood	device-related infection	West Japan	Fukuoka	SC3	8	3	3	1	1	4	4	3	8	t024	-	-	+	-	-	-	-	-	-	-	-	-	-	-	-	-	-	-	-	-	-	-	-	-	-	+	-	-
40045-19-S014	PRJDB15501	SAMD00591295	DRR456702	2020-02-14	male	85y	blood	unknown	West Japan	Fukuoka	SC1	2725	1	1	41	1	1	1	1	1	t1784	IVa	-	+	-	-	-	-	-	-	+	-	-	+	-	-	-	-	-	+	-	-	-	-	-	-	+	-	-
40045-19-S015	PRJDB15501	SAMD00591296	DRR456703	2020-02-23	female	84y	blood	unknown	West Japan	Fukuoka	SC1	7494	1	1	41	1	1	1	994	1	t1784	IVa	-	+	-	-	-	-	-	-	+	-	-	+	-	-	-	-	-	+	-	-	-	-	-	-	+	-	-
40045-19-S016	PRJDB15501	SAMD00591297	DRR456704	2020-02-24	female	71y	blood	unknown	West Japan	Fukuoka	SC9	45	10	14	8	6	10	3	2	45	t331	-	-	-	-	+	-	-	-	+	-	+	-	-	+	+	+	+	-	-	-	-	-	-	-	+	+	-	-
40045-19-S017	PRJDB15501	SAMD00591298	DRR456705	2020-03-22	male	89y	blood	device-related infection	West Japan	Fukuoka	SC9	508	10	40	8	6	10	3	2	508	t050	-	-	-	-	-	-	-	-	+	-	+	-	-	-	+	+	+	-	-	-	-	-	-	-	+	+	-	-
40045-19-S018	PRJDB15501	SAMD00591299	DRR456706	2020-03-23	male	7y	blood	bone infection	West Japan	Fukuoka	SC3	8	3	3	1	1	4	4	3	8	t008	-	-	-	+	-	-	-	-	-	-	-	-	+	-	-	-	-	+	+	-	-	-	-	-	-	+	-	-
40045-19-S019	PRJDB15501	SAMD00591300	DRR456707	2020-03-26	female	84y	blood	unknown	West Japan	Fukuoka	SC3	8	3	3	1	1	4	4	3	8	t008	IVl	-	-	-	+	-	-	+	-	-	-	-	-	+	-	-	-	+	-	-	-	-	-	-	-	+	-	-
40045-19-S020	PRJDB15501	SAMD00591301	DRR456708, DRR457487	2020-04-08	female	6m	blood	unknown	West Japan	Fukuoka	SC1	2725	1	1	41	1	1	1	1	1	t1784	IVa	-	+	-	-	-	-	-	-	-	-	-	+	-	-	-	-	-	+	-	-	-	-	-	-	+	-	-
40045-19-S021	PRJDB15501	SAMD00591302	DRR456709, DRR457488	2020-04-28	male	76y	blood	unknown	West Japan	Fukuoka	SC1	2725	1	1	41	1	1	1	1	1	t1784	IVa	-	+	-	-	-	-	-	-	+	-	-	+	-	-	-	-	-	+	-	-	-	-	-	-	+	-	-
40063-19-S001	PRJDB15501	SAMD00591303	DRR456710	2019-10-15	female	92y	blood	unknown	West Japan	Fukuoka	SC1	2725	1	1	41	1	1	1	1	1	t1784	IVa	-	+	-	-	-	-	-	-	+	-	-	+	-	-	-	-	-	+	-	-	-	-	-	-	+	-	-
40063-19-S002	PRJDB15501	SAMD00591304	DRR456711	2020-05-07	male	81y	blood	device-related infection	West Japan	Fukuoka	SC8	5	1	4	1	4	12	1	10	5	t1818	IIa	-	-	-	-	-	-	-	+	-	+	-	-	-	+	+	+	-	-	-	-	-	-	-	-	+	-	-
40092-19-S001	PRJDB15501	SAMD00591305	DRR456712	2020-01-28	male	4m	blood	device-related infection	West Japan	Fukuoka	SC3	8	3	3	1	1	4	4	3	8	t723	IV	-	-	-	-	-	-	-	-	-	-	-	-	-	-	-	-	+	-	-	-	-	-	-	-	+	-	-
40092-19-S002	PRJDB15501	SAMD00591306	DRR456713	2020-03-03	male	2m	blood	skin and soft tissue infection	West Japan	Fukuoka	SC3	8	3	3	1	1	4	4	3	8	t024	-	-	-	+	-	-	-	-	-	-	-	-	+	-	-	-	-	-	+	-	-	-	-	-	-	+	-	-
40092-19-S003	PRJDB15501	SAMD00591307	DRR456714	2020-03-19	female	67y	blood	unknown	West Japan	Fukuoka	SC4	15	13	13	1	1	12	11	13	15	t3345	-	-	-	-	-	-	-	-	-	-	-	-	-	-	-	-	-	-	-	-	-	-	-	-	-	+	-	-
40092-19-S004	PRJDB15501	SAMD00591308	DRR456715	2020-04-03	female	4m	blood	pneumonia	West Japan	Fukuoka	SC10	7495	2	2	2	2	6	821	2	30	t012	-	-	+	-	-	-	-	+	+	-	+	-	-	-	+	+	+	-	-	-	-	-	+	-	+	-	-	-
40092-19-S005	PRJDB15501	SAMD00591309	DRR456716	2020-05-11	male	89y	blood	bone infection	West Japan	Fukuoka	SC3	8	3	3	1	1	4	4	3	8	t1767	-	-	-	-	-	-	-	-	-	-	-	-	-	-	-	-	-	+	-	-	-	-	-	-	-	+	-	-
40092-19-S007	PRJDB15501	SAMD00591310	DRR456717	2020-06-05	male	13y	blood	skin and soft tissue infection	West Japan	Fukuoka	SC1	1	1	1	1	1	1	1	1	1	t127	-	-	+	+	-	-	-	-	-	+	-	-	+	-	-	-	-	-	+	-	-	-	-	-	-	+	-	-
40092-19-S008	PRJDB15501	SAMD00591311	DRR456718	2020-06-25	male	76y	blood	skin and soft tissue infection	West Japan	Fukuoka	SC11	398	3	35	19	2	20	26	39	398	t1451	-	-	-	-	-	-	-	-	-	-	-	-	-	-	-	-	-	-	-	-	-	-	-	-	-	-	-	-
41802-19-S001	PRJDB15501	SAMD00591312	DRR456719	2020-02-20	male	61y	blood	urinary-tract infection	West Japan	Saga	SC7	672	4	3	1	1	11	72	11	672	ND	-	-	-	-	+	-	-	-	+	-	+	-	-	+	+	+	+	+	-	-	-	-	-	-	-	+	-	-
41802-19-S002	PRJDB15501	SAMD00591313	DRR456720	2020-04-10	female	82y	blood	unknown	West Japan	Saga	SC2	188	3	1	1	8	1	1	1	188	t2883	-	-	-	-	-	-	-	-	-	-	-	-	-	-	-	-	-	-	-	-	-	-	-	-	-	+	-	-
41802-19-S003	PRJDB15501	SAMD00591314	DRR456721	2020-05-05	female	92ｙ	blood	urinary-tract infection	West Japan	Saga	SC1	2180	1	1	1	1	1	1	243	1	t1784	IVa	-	+	-	-	-	-	-	-	+	-	-	+	-	-	-	-	-	+	-	-	-	-	-	-	+	-	-
41802-19-S004	PRJDB15501	SAMD00591315	DRR456722	2020-05-26	female	79y	blood	skin and soft tissue infection	West Japan	Saga	SC3	8	3	3	1	1	4	4	3	8	t4133	-	-	-	-	+	-	-	+	-	-	-	-	-	+	-	-	-	-	-	-	-	-	-	-	-	+	-	-
41802-19-S005	PRJDB15501	SAMD00591316	DRR456723	2020-05-29	male	52y	blood	urinary-tract infection	West Japan	Saga	SC7	6	12	4	1	4	12	1	3	6	t304	-	-	+	-	-	-	-	-	-	-	-	-	-	-	-	-	-	-	-	-	-	-	-	-	-	+	-	-
42003-19-S001	PRJDB15501	SAMD00591317	DRR456724	2019-10-04	male	79y	blood	urinary-tract infection	West Japan	Nagasaki	SC7	12	1	3	1	8	11	5	11	12	t8426	-	-	-	+	-	-	-	-	-	-	-	-	-	-	-	-	-	+	-	-	-	-	-	-	-	+	-	+
42003-19-S002	PRJDB15501	SAMD00591318	DRR456725	2019-10-15	male	62y	blood	bone infection	West Japan	Nagasaki	SC2	188	3	1	1	8	1	1	1	188	t189	-	-	-	-	-	-	-	-	-	-	-	-	-	-	-	-	-	-	-	-	-	-	-	-	-	+	-	-
42003-19-S003	PRJDB15501	SAMD00591319	DRR456726	2019-10-24	male	28y	blood	device-related infection	West Japan	Nagasaki	SC8	5	1	4	1	4	12	1	10	5	t1080	II	-	-	-	+	-	-	+	+	-	+	-	-	+	+	+	+	-	-	-	-	-	-	-	-	+	-	-
42003-19-S004	PRJDB15501	SAMD00591320	DRR456727, DRR457489	2019-10-26	female	59y	blood	urinary-tract infection	West Japan	Nagasaki	SC8	5	1	4	1	4	12	1	10	5	ND	-	-	-	-	-	-	-	+	+	-	+	-	-	-	+	+	+	+	-	-	-	-	-	-	-	+	-	-
42003-19-S005	PRJDB15501	SAMD00591321	DRR456728	2019-11-02	male	83y	blood	device-related infection	West Japan	Nagasaki	SC8	5	1	4	1	4	12	1	10	5	t179	-	-	-	-	-	-	-	-	+	-	+	-	-	-	+	+	+	-	-	-	-	-	-	-	-	+	-	-
42003-19-S006	PRJDB15501	SAMD00591322	DRR456729	2019-11-26	male	91y	blood	device-related infection	West Japan	Nagasaki	SC12	121	6	5	6	2	7	14	5	121	t5072	-	-	-	-	-	-	-	-	+	-	+	-	-	-	+	+	+	-	-	-	-	-	+	-	-	+	+	+
42003-19-S007	PRJDB15501	SAMD00591323	DRR456730	2019-12-03	male	78y	blood	skin and soft tissue infection	West Japan	Nagasaki	SC1	1	1	1	1	1	1	1	1	1	t127	-	-	+	-	-	-	-	-	-	+	-	-	+	-	-	-	-	-	+	-	-	-	-	-	-	+	-	-
42003-19-S008	PRJDB15501	SAMD00591324	DRR456731	2019-12-09	male	62y	blood	device-related infection	West Japan	Nagasaki	SC2	188	3	1	1	8	1	1	1	188	t5693	-	-	-	-	-	-	-	-	-	-	-	-	-	-	-	-	-	-	-	-	-	-	-	-	-	+	-	-
42003-19-S009B	PRJDB15501	SAMD00591325	DRR456732	2019-12-16	male	89y	blood	skin and soft tissue infection	West Japan	Nagasaki	SC2	188	3	1	1	8	1	1	1	188	t189	-	-	-	-	-	-	-	-	-	-	-	-	-	-	-	-	-	-	-	-	-	-	-	-	-	+	-	-
42003-19-S010	PRJDB15501	SAMD00591326	DRR456733, DRR546388	2019-12-18	male	85y	blood	unknown	West Japan	Nagasaki	SC8	764	1	136	1	4	12	1	10	5	t002	IIa	II	-	+	-	-	-	-	+	-	+	-	-	-	+	+	+	-	-	-	-	-	-	-	-	+	-	-
42003-19-S011	PRJDB15501	SAMD00591327	DRR456734	2020-01-14	male	78y	blood	device-related infection	West Japan	Nagasaki	SC2	188	3	1	1	8	1	1	1	188	t189	-	-	-	-	-	-	-	-	-	-	-	-	-	-	-	-	-	-	-	-	-	-	-	-	-	+	-	-
42003-19-S012	PRJDB15501	SAMD00591328	DRR456735	2020-01-17	male	86y	blood	unknown	West Japan	Nagasaki	SC1	2725	1	1	41	1	1	1	1	1	t1784	IVa	-	+	-	-	-	-	-	-	+	-	-	+	-	-	-	-	-	+	-	-	-	-	-	-	+	-	-
42003-19-S013	PRJDB15501	SAMD00591329	DRR456736	2020-01-28	male	83y	blood	unknown	West Japan	Nagasaki	SC3	8	3	3	1	1	4	4	3	8	t622	I	-	-	-	-	-	-	-	-	-	-	-	-	-	-	-	-	-	-	-	-	-	-	-	-	+	-	-
42003-19-S014	PRJDB15501	SAMD00591330	DRR456737	2020-01-31	male	72y	blood	others	West Japan	Nagasaki	SC7	12	1	3	1	8	11	5	11	12	t160	-	-	-	+	-	-	-	-	-	-	-	-	-	-	-	-	-	+	-	-	-	-	-	-	-	+	-	+
42003-19-S015	PRJDB15501	SAMD00591331	DRR456738	2020-02-02	male	50y	blood	skin and soft tissue infection	West Japan	Nagasaki	SC2	188	3	1	1	8	1	1	1	188	t189	-	-	-	-	-	-	-	-	-	-	-	-	-	-	-	-	-	-	-	-	-	-	-	-	-	+	-	-
42003-19-S016	PRJDB15501	SAMD00591332	DRR456739	2020-02-05	female	47y	blood	others	West Japan	Nagasaki	SC6	97	3	1	1	1	1	5	3	97	t1234	-	-	-	-	-	-	-	-	-	-	-	-	-	-	-	-	-	-	-	-	-	-	-	-	-	+	-	-
42003-19-S017	PRJDB15501	SAMD00591333	DRR456740	2020-02-10	male	70y	blood	skin and soft tissue infection	West Japan	Nagasaki	SC1	7496	1	1	1	1	1	1	995	1	t127	-	-	+	+	-	-	-	-	-	+	-	-	+	-	-	-	-	-	+	-	-	-	-	-	-	+	-	-
42003-19-S018	PRJDB15501	SAMD00591334	DRR456741	2020-02-16	male	93y	blood	others	West Japan	Nagasaki	SC1	1	1	1	1	1	1	1	1	1	t1784	IVa	-	+	-	-	-	-	-	-	+	-	-	+	-	-	-	-	-	+	-	-	-	-	-	-	+	-	-
42003-19-S019	PRJDB15501	SAMD00591335	DRR456742	2020-02-07	female	86y	blood	device-related infection	West Japan	Nagasaki	SC3	8	3	3	1	1	4	4	3	8	t008	IVl	-	-	-	+	-	-	+	-	-	-	-	-	+	-	-	-	-	-	-	-	-	-	-	-	+	-	-
42003-19-S020	PRJDB15501	SAMD00591336	DRR456743	2020-03-05	male	71y	blood	others	West Japan	Nagasaki	SC1	2725	1	1	41	1	1	1	1	1	t1784	-	-	+	-	-	-	-	-	-	+	-	-	+	-	-	-	-	-	+	-	-	-	-	-	-	+	-	-
42003-19-S021	PRJDB15501	SAMD00591337	DRR456744	2020-03-07	male	67y	blood	intra-abdominal infection	West Japan	Nagasaki	SC1	1	1	1	1	1	1	1	1	1	t1784	IVa	-	+	-	-	-	-	-	-	+	-	-	-	-	-	-	-	-	+	-	-	-	-	-	-	+	-	-
42003-19-S022	PRJDB15501	SAMD00591338	DRR456745	2020-03-13	male	78y	blood	device-related infection	West Japan	Nagasaki	SC3	8	3	3	1	1	4	4	3	8	t008	-	-	-	-	-	-	-	-	-	-	-	-	-	-	-	-	-	+	-	-	-	-	-	-	-	+	-	-
42003-19-S023	PRJDB15501	SAMD00591339	DRR456746	2020-03-16	male	80y	blood	bone infection	West Japan	Nagasaki	SC2	188	3	1	1	8	1	1	1	188	t2883	-	-	-	-	-	-	-	-	-	-	-	-	-	-	-	-	-	-	-	-	-	-	-	-	-	+	-	-
42003-19-S024	PRJDB15501	SAMD00591340	DRR456747	2020-03-22	female	94y	blood	unknown	West Japan	Nagasaki	SC1	1	1	1	1	1	1	1	1	1	t7971	IVa	-	+	-	-	-	-	-	-	+	-	-	-	-	-	-	-	-	+	-	-	-	-	-	-	+	-	-
42003-19-S025	PRJDB15501	SAMD00591341	DRR456748	2020-03-24	male	70y	blood	urinary-tract infection	West Japan	Nagasaki	SC2	188	3	1	1	8	1	1	1	188	t189	-	-	-	-	-	-	-	-	-	-	-	-	-	-	-	-	-	-	-	-	-	-	-	-	-	+	-	-
42003-19-S026	PRJDB15501	SAMD00591342	DRR456749	2020-04-08	male	61y	blood	skin and soft tissue infection	West Japan	Nagasaki	SC3	8	3	3	1	1	4	4	3	8	t5071	IVh	-	-	-	-	-	-	-	-	-	-	-	-	-	-	-	-	+	-	-	-	-	-	-	-	+	-	-
42003-19-S027	PRJDB15501	SAMD00591343	DRR456750	2020-04-17	female	41y	blood	infectious endocarditis	West Japan	Nagasaki	SC2	188	3	1	1	8	1	1	1	188	t189	-	-	-	-	-	-	-	-	-	-	-	-	-	-	-	-	-	-	-	-	-	-	-	-	-	+	-	-
42003-19-S028	PRJDB15501	SAMD00591344	DRR456751	2020-04-26	female	3m	blood	pneumonia	West Japan	Nagasaki	SC11	398	3	35	19	2	20	26	39	398	ND	-	-	-	-	-	-	-	-	-	-	-	-	-	-	-	-	-	-	-	-	-	-	-	-	-	-	-	-
42003-19-S029	PRJDB15501	SAMD00591345	DRR456752	2020-05-05	female	64y	blood	others	West Japan	Nagasaki	SC9	45	10	14	8	6	10	3	2	45	t3000	-	-	-	-	+	-	-	+	+	-	+	-	-	+	+	+	+	-	-	-	-	-	-	-	-	+	-	-
42003-19-S030	PRJDB15501	SAMD00591346	DRR456753	2020-05-08	male	72y	blood	pneumonia	West Japan	Nagasaki	SC7	25	4	1	4	1	5	5	4	25	t258	-	-	-	+	-	-	-	-	+	-	+	-	-	-	+	-	+	-	-	-	-	-	-	-	+	+	-	-
42003-19-S031	PRJDB15501	SAMD00591347	DRR456754	2020-05-17	female	61y	blood	device-related infection	West Japan	Nagasaki	SC1	1	1	1	1	1	1	1	1	1	t2279	-	-	+	-	-	-	-	-	-	+	-	-	+	-	-	-	-	-	+	-	-	-	-	-	-	+	-	-
42003-19-S032	PRJDB15501	SAMD00591348	DRR456755	2020-05-21	male	82y	blood	unknown	West Japan	Nagasaki	SC1	2725	1	1	41	1	1	1	1	1	t1784	IVa	-	+	-	-	-	-	-	-	+	-	-	+	-	-	-	-	-	+	-	-	-	-	-	-	+	-	-
42003-19-S033	PRJDB15501	SAMD00591349	DRR456756	2020-06-19	female	80y	blood	bone infection	West Japan	Nagasaki	SC10	30	2	2	2	2	6	3	2	30	t021	-	-	-	-	-	-	-	-	+	-	+	-	-	-	+	+	+	-	-	-	-	-	+	-	+	-	-	-
43001-19-S001	PRJDB15501	SAMD00591350	DRR456757	2019-06-10	male	83y	blood	unknown	West Japan	Kumamoto	SC1	2725	1	1	41	1	1	1	1	1	t1784	IVa	-	+	-	-	-	-	-	-	+	-	-	+	-	-	-	-	-	+	-	-	-	-	-	-	+	-	-
43001-19-S002	PRJDB15501	SAMD00591351	DRR456758, DRR546389	2019-06-18	male	91y	blood	pneumonia	West Japan	Kumamoto	SC8	764	1	136	1	4	12	1	10	5	t045	IIa	-	-	+	-	-	-	-	+	-	+	-	-	-	+	+	+	-	-	-	-	-	-	-	-	+	-	-
43001-19-S003	PRJDB15501	SAMD00591352	DRR456759, DRR457490	2019-06-23	male	72y	blood	unknown	West Japan	Kumamoto	SC1	1	1	1	1	1	1	1	1	1	t1784	IVa	-	+	-	-	-	-	-	-	+	-	-	+	-	-	-	-	-	+	-	-	-	-	-	-	+	-	-
43001-19-S004	PRJDB15501	SAMD00591353	DRR456760	2019-06-27	female	84y	blood	device-related infection	West Japan	Kumamoto	SC3	8	3	3	1	1	4	4	3	8	t008	IVl	-	-	-	+	-	-	+	-	-	-	-	-	+	-	-	-	+	-	-	-	-	-	-	-	+	-	-
43001-19-S005	PRJDB15501	SAMD00591354	DRR456761	2019-06-29	female	60y	blood	unknown	West Japan	Kumamoto	SC3	8	3	3	1	1	4	4	3	8	t008	IVl	-	-	-	+	-	-	+	-	-	-	-	-	+	-	-	-	+	-	-	-	-	-	-	-	+	-	-
43001-19-S006	PRJDB15501	SAMD00591355	DRR456762	2019-06-29	male	60y	blood	unknown	West Japan	Kumamoto	SC1	2725	1	1	41	1	1	1	1	1	t1784	IVa	-	+	-	-	-	-	-	-	+	-	-	+	-	-	-	-	-	+	-	-	-	-	-	-	+	-	-
43001-19-S007	PRJDB15501	SAMD00591356	DRR456763	2019-07-08	female	92y	blood	pneumonia	West Japan	Kumamoto	SC3	630	12	3	1	1	4	4	3	8	t7291	-	-	-	-	-	-	-	-	-	-	-	-	-	-	-	-	-	-	-	-	-	-	-	-	-	+	-	-
43001-19-S008	PRJDB15501	SAMD00591357	DRR456764	2019-07-31	female	91y	blood	unknown	West Japan	Kumamoto	SC3	8	3	3	1	1	4	4	3	8	t1767	IVl	-	-	-	+	-	-	+	-	-	-	-	+	+	-	-	-	-	+	-	-	-	-	-	-	+	-	-
43001-19-S009	PRJDB15501	SAMD00591358	DRR456765	2019-07-31	male	64y	blood	pneumonia	West Japan	Kumamoto	SC1	1	1	1	1	1	1	1	1	1	t1784	IVa	-	+	-	-	-	-	-	-	+	-	-	+	-	-	-	-	-	+	-	-	-	-	-	-	+	-	-
43001-19-S010	PRJDB15501	SAMD00591359	DRR456766	2019-08-07	male	83y	blood	pneumonia	West Japan	Kumamoto	SC3	8	3	3	1	1	4	4	3	8	t1767	I	-	-	-	-	-	-	-	-	-	-	-	-	-	-	-	-	+	-	-	-	-	-	-	-	+	-	-
43001-19-S011	PRJDB15501	SAMD00591360	DRR456767	2019-08-10	female	83y	blood	device-related infection	West Japan	Kumamoto	SC8	5	1	4	1	4	12	1	10	5	t002	-	-	-	-	-	+	-	-	+	-	+	+	-	-	+	-	+	-	-	+	-	-	-	-	-	+	-	-
43001-19-S012	PRJDB15501	SAMD00591361	DRR456768	2019-09-05	male	59y	blood	unknown	West Japan	Kumamoto	SC3	630	12	3	1	1	4	4	3	8	t15044	-	-	-	-	-	-	-	-	-	-	-	-	-	-	-	-	-	-	-	-	-	-	-	-	-	+	-	-
43001-19-S013	PRJDB15501	SAMD00591362	DRR456769, DRR457491	2019-09-24	female	71y	blood	bone infection	West Japan	Kumamoto	SC1	1	1	1	1	1	1	1	1	1	t127	-	-	+	+	-	-	-	-	-	+	-	-	+	-	-	-	-	-	+	-	-	-	-	-	-	+	-	-
43001-19-S014	PRJDB15501	SAMD00591363	DRR456770	2019-09-24	female	82y	blood	pneumonia	West Japan	Kumamoto	SC1	7497	879	1	41	1	1	1	1	1	t1784	IVa	-	+	-	-	-	-	-	-	+	-	-	+	-	-	-	-	-	+	-	-	-	-	-	-	+	-	-
43001-19-S015	PRJDB15501	SAMD00591364	DRR456771	2019-10-03	male	83y	blood	pneumonia	West Japan	Kumamoto	SC3	8	3	3	1	1	4	4	3	8	t024	-	-	+	-	-	+	-	-	-	-	-	+	-	-	-	-	-	-	-	+	-	-	-	-	-	+	-	-
43001-19-S016	PRJDB15501	SAMD00591365	DRR456772	2019-10-14	male	74y	blood	pneumonia	West Japan	Kumamoto	SC5	20	4	9	1	8	1	10	8	20	t4542	-	-	-	-	-	-	-	-	+	-	+	-	-	-	+	-	+	-	-	-	-	-	-	-	-	+	+	-
43001-19-S017	PRJDB15501	SAMD00591366	DRR456773	2019-10-15	female	83y	blood	skin and soft tissue infection	West Japan	Kumamoto	SC1	1	1	1	1	1	1	1	1	1	t1784	IVa	-	+	-	-	-	-	-	-	+	-	-	+	-	-	-	-	-	+	-	-	-	-	-	-	+	-	-
43001-19-S018	PRJDB15501	SAMD00591367	DRR456774	2019-10-20	male	79y	blood	device-related infection	West Japan	Kumamoto	SC3	8	3	3	1	1	4	4	3	8	t008	I	-	-	-	-	-	-	-	-	-	-	-	-	-	-	-	-	-	-	-	-	-	-	-	-	+	-	-
43001-19-S019	PRJDB15501	SAMD00591368	DRR456775	2019-10-24	male	68y	blood	urinary-tract infection	West Japan	Kumamoto	SC1	1	1	1	1	1	1	1	1	1	t1784	IVa	-	+	-	-	-	-	-	-	+	-	-	+	-	-	-	-	-	+	-	-	-	-	-	-	+	-	-
43001-19-S020	PRJDB15501	SAMD00591369	DRR456776	2019-10-26	female	91y	blood	pneumonia	West Japan	Kumamoto	SC8	5	1	4	1	4	12	1	10	5	t002	-	-	-	-	-	-	-	-	+	-	+	-	-	-	+	-	+	-	-	-	-	-	-	-	-	+	-	-
43001-19-S021	PRJDB15501	SAMD00591370	DRR456777	2019-10-29	female	68y	blood	unknown	West Japan	Kumamoto	SC1	1	1	1	1	1	1	1	1	1	t1784	IVa	-	+	-	-	-	-	-	-	+	-	-	+	-	-	-	-	-	+	-	-	-	-	-	-	+	-	-
43001-19-S022	PRJDB15501	SAMD00591371	DRR456778	2019-11-01	male	88y	blood	pneumonia	West Japan	Kumamoto	SC1	2725	1	1	41	1	1	1	1	1	t1784	IVa	-	+	-	-	-	-	-	-	+	-	-	+	-	-	-	-	-	+	-	-	-	-	-	-	+	-	-
43001-19-S023	PRJDB15501	SAMD00591372	DRR456779	2019-11-03	female	101y	blood	bone infection	West Japan	Kumamoto	SC1	1	1	1	1	1	1	1	1	1	t1784	IVa	-	+	-	-	-	-	-	-	+	-	-	+	-	-	-	-	-	+	-	-	-	-	-	-	+	-	-
43001-19-S024	PRJDB15501	SAMD00591373	DRR456780	2019-11-11	female	78y	blood	pneumonia	West Japan	Kumamoto	SC2	7498	3	1060	1	8	1	1	1	ND	t693	-	-	-	+	-	-	-	-	-	-	-	-	-	-	-	-	-	-	-	-	-	-	-	-	-	+	-	-
43001-19-S025	PRJDB15501	SAMD00591374	DRR456781	2019-11-17	female	69y	blood	skin and soft tissue infection	West Japan	Kumamoto	SC3	8	3	3	1	1	4	4	3	8	t1767	I	-	-	-	-	-	-	-	-	-	-	-	-	-	-	-	-	+	-	-	-	-	-	-	-	+	-	-
43001-19-S026	PRJDB15501	SAMD00591375	DRR456782	2019-11-21	male	99y	blood	pneumonia	West Japan	Kumamoto	SC12	121	6	5	6	2	7	14	5	121	t5072	V	-	-	-	-	-	-	-	+	-	+	-	-	-	+	+	+	-	-	-	-	-	+	-	-	+	+	+
43001-19-S027	PRJDB15501	SAMD00591376	DRR456783	2019-11-21	male	54y	blood	urinary-tract infection	West Japan	Kumamoto	SC3	8	3	3	1	1	4	4	3	8	t460	-	-	-	-	+	-	-	+	-	-	-	-	-	+	-	-	-	+	-	-	-	-	-	-	-	+	-	-
43001-19-S028	PRJDB15501	SAMD00591377	DRR456784	2019-11-28	female	103y	blood	pneumonia	West Japan	Kumamoto	SC3	8	3	3	1	1	4	4	3	8	t5071	IVj	-	-	-	-	-	-	-	-	-	-	-	-	-	-	-	-	+	-	-	-	-	-	-	-	+	-	-
43001-19-S029	PRJDB15501	SAMD00591378	DRR456785	2019-11-20	male	75y	blood	intra-abdominal infection	West Japan	Kumamoto	SC12	121	6	5	6	2	7	14	5	121	t5072	V	-	-	-	-	-	-	-	+	-	+	-	-	-	+	+	+	-	-	-	-	-	+	-	-	+	+	+
43001-19-S030	PRJDB15501	SAMD00591379	DRR456786, DRR457492	2019-12-05	male	30y	blood	unknown	West Japan	Kumamoto	SC1	1	1	1	1	1	1	1	1	1	t321	-	-	-	-	-	-	-	-	-	+	-	-	-	-	-	-	-	-	-	-	-	-	-	-	-	+	-	-
43001-19-S031	PRJDB15501	SAMD00591380	DRR456787	2019-12-05	male	60y	blood	device-related infection	West Japan	Kumamoto	SC3	8	3	3	1	1	4	4	3	8	t008	-	-	-	+	-	-	-	-	-	-	-	-	+	-	-	-	-	+	+	-	-	-	-	-	-	+	-	-
43001-19-S032	PRJDB15501	SAMD00591381	DRR456788, DRR546390	2019-12-06	male	79y	blood	unknown	West Japan	Kumamoto	SC8	764	1	136	1	4	12	1	10	5	t002	IIa	-	-	+	-	-	-	-	+	-	+	-	+	-	+	+	+	-	+	-	-	-	-	-	-	+	-	-
43001-19-S033	PRJDB15501	SAMD00591382	DRR456789	2019-12-11	female	70y	blood	unknown	West Japan	Kumamoto	SC3	8	3	3	1	1	4	4	3	8	t460	-	-	-	-	-	-	-	-	-	-	-	-	-	-	-	-	-	-	-	-	-	-	-	-	-	+	-	-
43001-19-S034	PRJDB15501	SAMD00591383	DRR456790	2019-12-11	male	82y	blood	intra-abdominal infection	West Japan	Kumamoto	SC1	2725	1	1	41	1	1	1	1	1	t1784	IVa	-	+	-	-	-	-	-	-	+	-	-	+	-	-	-	-	-	+	-	-	-	-	-	-	+	-	-
43001-19-S035	PRJDB15501	SAMD00591384	DRR456791	2019-12-19	male	79y	blood	device-related infection	West Japan	Kumamoto	SC7	1369	1	3	1	8	157	5	11	12	t160	-	-	-	+	-	-	-	-	-	-	-	-	-	-	-	-	-	+	-	-	-	-	-	-	-	+	-	+
43001-19-S036	PRJDB15501	SAMD00591385	DRR456792	2019-12-30	female	80y	blood	pneumonia	West Japan	Kumamoto	SC1	1	1	1	1	1	1	1	1	1	t1784	IVa	-	-	-	-	-	-	-	-	+	-	-	-	-	-	-	-	-	-	-	-	-	-	-	-	+	-	-
43001-19-S037	PRJDB15501	SAMD00591386	DRR456793	2019-12-31	female	62y	blood	unknown	West Japan	Kumamoto	SC7	12	1	3	1	8	11	5	11	12	t160	-	-	-	+	-	-	-	-	-	-	-	-	-	-	-	-	-	+	-	-	-	-	-	-	-	+	-	+
43001-19-S038	PRJDB15501	SAMD00591387	DRR456794	2020-01-02	male	69y	blood	pneumonia	West Japan	Kumamoto	SC8	5	1	4	1	4	12	1	10	5	t548	-	-	-	-	-	-	-	-	+	-	+	-	-	-	+	+	+	-	-	-	-	-	-	-	-	+	-	-
43001-19-S039	PRJDB15501	SAMD00591388	DRR456795	2020-01-21	male	87y	blood	pneumonia	West Japan	Kumamoto	SC13	7499	154	79	6	2	149	494	102	ND	ND	-	-	-	-	-	-	-	-	-	-	-	-	-	-	-	-	-	-	-	-	-	-	-	-	-	+	-	-
43001-19-S040	PRJDB15501	SAMD00591389	DRR456796	2020-02-02	male	68y	blood	unknown	West Japan	Kumamoto	SC1	1	1	1	1	1	1	1	1	1	t1784	IVa	-	+	-	-	-	-	-	-	+	-	-	+	-	-	-	-	-	+	-	-	-	-	-	-	+	-	-
43001-19-S041	PRJDB15501	SAMD00591390	DRR456797	2020-02-10	male	80y	blood	unknown	West Japan	Kumamoto	SC3	8	3	3	1	1	4	4	3	8	t5071	IVj	-	-	-	-	-	-	-	-	-	-	-	-	-	-	-	-	+	-	-	-	-	-	-	-	+	-	-
43001-19-S042	PRJDB15501	SAMD00591391	DRR456798	2020-02-12	male	91y	blood	pneumonia	West Japan	Kumamoto	SC1	2725	1	1	41	1	1	1	1	1	t1784	IVa	-	+	-	-	-	-	-	-	+	-	-	+	-	-	-	-	-	+	-	-	-	-	-	-	+	-	-
43001-19-S043	PRJDB15501	SAMD00591392	DRR456799	2020-02-13	female	83y	blood	unknown	West Japan	Kumamoto	SC1	2725	1	1	41	1	1	1	1	1	t1784	IVa	-	+	-	-	-	-	-	-	+	-	-	+	-	-	-	-	-	+	-	-	-	-	-	-	+	-	-
43001-19-S044	PRJDB15501	SAMD00591393	DRR456800	2020-02-14	female	84y	blood	unknown	West Japan	Kumamoto	SC8	5	1	4	1	4	12	1	10	5	t002	-	-	-	-	-	+	-	-	+	-	+	+	-	-	+	+	+	-	-	+	-	-	-	-	-	+	-	-
43001-19-S045	PRJDB15501	SAMD00591394	DRR456801	2020-02-22	male	67y	blood	skin and soft tissue infection	West Japan	Kumamoto	SC9	508	10	40	8	6	10	3	2	508	t050	-	-	-	-	-	-	-	-	+	-	-	-	-	-	+	+	+	-	-	-	-	-	-	-	+	+	-	-
43001-19-S046	PRJDB15501	SAMD00591395	DRR456802	2020-02-24	male	61y	blood	skin and soft tissue infection	West Japan	Kumamoto	SC1	1	1	1	1	1	1	1	1	1	t1784	IVa	-	+	-	-	-	-	-	-	+	-	-	+	-	-	-	-	-	+	-	-	-	-	-	-	+	-	-
43001-19-S047	PRJDB15501	SAMD00591396	DRR456803	2020-03-01	female	71y	blood	pneumonia	West Japan	Kumamoto	SC1	2725	1	1	41	1	1	1	1	1	t1784	IVa	-	+	-	-	-	-	-	-	+	-	-	+	-	-	-	-	-	+	-	-	-	-	-	-	+	-	-
43001-19-S048	PRJDB15501	SAMD00591397	DRR456804	2020-03-11	female	83y	blood	pneumonia	West Japan	Kumamoto	SC1	1	1	1	1	1	1	1	1	1	t1784	IVa	-	+	-	-	-	-	-	-	+	-	-	+	-	-	-	-	-	+	-	-	-	-	-	-	+	-	-
43001-19-S049	PRJDB15501	SAMD00591398	DRR456805, DRR546391	2020-03-13	female	96y	blood	unknown	West Japan	Kumamoto	SC8	764	1	136	1	4	12	1	10	5	t002	II	-	-	+	-	-	-	-	+	-	+	-	+	-	+	+	+	-	+	-	-	-	-	-	-	+	-	-
43001-19-S051	PRJDB15501	SAMD00591399	DRR456806	2020-03-22	male	91y	blood	pneumonia	West Japan	Kumamoto	SC1	1	1	1	1	1	1	1	1	1	t1784	IVa	-	+	-	-	-	-	-	-	+	-	-	+	-	-	-	-	-	+	-	-	-	-	-	-	+	-	-
43001-19-S052	PRJDB15501	SAMD00591400	DRR456807	2020-03-23	male	85y	blood	pneumonia	West Japan	Kumamoto	SC3	8	3	3	1	1	4	4	3	8	t1767	I	-	-	-	-	-	-	-	-	-	-	-	-	-	-	-	-	+	-	-	-	-	-	-	-	+	-	-
43001-19-S053	PRJDB15501	SAMD00591401	DRR456808	2020-04-06	male	74y	blood	skin and soft tissue infection	West Japan	Kumamoto	SC3	8	3	3	1	1	4	4	3	8	t1767	I	-	-	-	-	-	-	-	-	-	-	-	-	-	-	-	-	-	-	-	-	-	-	-	-	+	-	-
43001-19-S054	PRJDB15501	SAMD00591402	DRR456809	2020-04-30	male	64y	blood	pneumonia	West Japan	Kumamoto	SC7	72	1	4	1	8	4	4	3	72	t1597	-	-	-	-	-	-	-	-	+	-	+	-	-	-	+	+	+	-	-	-	-	-	-	-	+	+	-	-
43001-19-S055	PRJDB15501	SAMD00591403	DRR456810	2020-05-01	female	69y	blood	unknown	West Japan	Kumamoto	SC10	30	2	2	2	2	6	3	2	30	t338	-	-	-	-	-	-	-	+	+	-	+	-	-	-	+	+	+	-	-	-	-	-	+	-	+	-	-	-
43001-19-S056	PRJDB15501	SAMD00591404	DRR456811	2020-05-02	male	79y	blood	skin and soft tissue infection	West Japan	Kumamoto	SC8	5	1	4	1	4	12	1	10	5	t1265	-	-	-	-	-	-	-	+	+	-	+	-	-	-	+	+	+	+	-	-	-	-	-	-	-	+	-	-
43001-19-S057	PRJDB15501	SAMD00591405	DRR456812	2020-05-11	male	61y	blood	pneumonia	West Japan	Kumamoto	SC3	8	3	3	1	1	4	4	3	8	t1767	I	-	-	-	-	-	-	-	-	-	-	-	-	-	-	-	-	-	-	-	-	-	-	-	-	+	-	-
43001-19-S058	PRJDB15501	SAMD00591406	DRR456813	2020-05-12	male	80y	blood	unknown	West Japan	Kumamoto	SC1	1	1	1	1	1	1	1	1	1	t127	-	-	+	+	-	-	-	-	-	+	-	-	+	-	-	-	-	-	+	-	-	-	-	-	-	+	-	-
43001-19-S059	PRJDB15501	SAMD00591407	DRR456814, DRR457493	2020-05-14	male	86y	blood	pneumonia	West Japan	Kumamoto	SC3	8	3	3	1	1	4	4	3	8	t1767	I	-	-	-	-	-	-	-	-	-	-	-	-	-	-	-	-	+	-	-	-	-	-	-	-	+	-	-
43001-19-S060	PRJDB15501	SAMD00591408	DRR456815	2020-05-25	female	81y	blood	urinary-tract infection	West Japan	Kumamoto	SC1	2725	1	1	41	1	1	1	1	1	t1784	IVa	-	+	-	-	-	-	-	-	+	-	-	+	-	-	-	-	-	+	-	-	-	-	-	-	+	-	-
43001-19-S061	PRJDB15501	SAMD00591409	DRR456816	2020-05-28	male	91y	blood	pneumonia	West Japan	Kumamoto	SC3	8	3	3	1	1	4	4	3	8	t5071	IVj	-	-	-	-	-	-	-	-	-	-	-	-	-	-	-	-	+	-	-	-	-	-	-	-	+	-	-
43001-19-S062	PRJDB15501	SAMD00591410	DRR456817	2020-05-28	female	93y	blood	pneumonia	West Japan	Kumamoto	SC1	2725	1	1	41	1	1	1	1	1	t1784	IVa	-	+	-	-	-	-	-	-	+	-	-	+	-	-	-	-	-	+	-	-	-	-	-	-	+	-	-
43001-19-S063	PRJDB15501	SAMD00591411	DRR456818	2020-06-04	male	75y	blood	pneumonia	West Japan	Kumamoto	SC1	2725	1	1	41	1	1	1	1	1	t1784	-	-	+	-	-	-	-	-	-	+	-	-	+	-	-	-	-	-	+	-	-	-	-	-	-	+	-	-
43001-19-S064	PRJDB15501	SAMD00591412	DRR456819	2020-06-12	male	66y	blood	urinary-tract infection	West Japan	Kumamoto	SC9	45	10	14	8	6	10	3	2	45	t065	-	-	-	-	-	-	-	-	+	-	+	-	-	-	+	+	+	-	-	-	-	-	-	-	+	+	-	-
43001-19-S065	PRJDB15501	SAMD00591413	DRR456820	2020-06-29	female	68y	blood	skin and soft tissue infection	West Japan	Kumamoto	SC8	5	1	4	1	4	12	1	10	5	t1062	IVj	-	+	-	-	-	-	-	-	-	-	-	-	-	-	-	-	-	-	-	-	-	-	-	-	+	-	-
43002-19-S001	PRJDB15501	SAMD00591414	DRR456821, DRR457494	2020-01-03	male	60y	blood	skin and soft tissue infection	West Japan	Kumamoto	SC8	5	1	4	1	4	12	1	10	5	t1062	IVk	-	+	-	-	-	-	-	+	-	+	-	-	-	+	-	+	-	-	-	-	-	-	-	-	+	-	-
43020-19-S001	PRJDB15501	SAMD00591415	DRR456822	2019-09-27	male	84y	blood	unknown	West Japan	Kumamoto	SC3	8	3	3	1	1	4	4	3	8	t008	IVl	-	-	-	+	-	-	+	-	-	-	-	-	+	-	-	-	-	-	-	-	-	-	-	-	+	-	-
44002-19-S001	PRJDB15501	SAMD00591416	DRR456823	2020-01-24	female	61y	blood	pneumonia	West Japan	Oita	SC6	97	3	1	1	1	1	5	3	97	t267	-	-	-	-	-	-	-	-	-	-	-	-	-	-	-	-	-	-	-	-	-	-	-	-	-	+	-	-
44002-19-S002	PRJDB15501	SAMD00591417	DRR456824	2020-01-15	male	46y	blood	pneumonia	West Japan	Oita	SC3	8	3	3	1	1	4	4	3	8	t008	IVa	I	-	-	-	-	-	-	-	-	-	-	+	-	-	-	-	-	+	-	-	-	-	-	-	+	-	-
44002-19-S003	PRJDB15501	SAMD00591418	DRR456825, DRR546392	2020-02-07	male	81y	blood	pneumonia	West Japan	Oita	SC8	764	1	136	1	4	12	1	10	5	t002	IIa	-	-	-	-	-	-	-	+	-	+	-	-	-	+	+	+	-	-	-	-	-	-	-	-	+	-	-
44002-19-S004	PRJDB15501	SAMD00591419	DRR456826	2020-03-11	male	61y	blood	device-related infection	West Japan	Oita	SC1	1	1	1	1	1	1	1	1	1	t1784	IVa	-	+	-	-	-	-	-	-	+	-	-	+	-	-	-	-	-	+	-	-	-	-	-	-	+	-	-
44002-19-S005	PRJDB15501	SAMD00591420	DRR456827	2020-03-12	male	61y	blood	skin and soft tissue infection	West Japan	Oita	SC3	8	3	3	1	1	4	4	3	8	t12891	-	-	-	-	-	-	-	-	-	-	-	-	-	-	-	-	-	+	-	-	-	-	-	-	-	+	-	-
44002-19-S006	PRJDB15501	SAMD00591421	DRR456828	2020-03-09	female	86y	blood	pneumonia	West Japan	Oita	SC9	45	10	14	8	6	10	3	2	45	ND	-	-	-	-	-	-	-	-	+	-	+	-	-	-	+	+	+	-	-	-	-	-	-	-	+	+	-	-
44013-19-S001	PRJDB15501	SAMD00591422	DRR456829	2019-11-17	male	49y	blood	unknown	West Japan	Oita	SC1	2725	1	1	41	1	1	1	1	1	t1784	IVa	-	+	-	-	-	-	-	-	+	-	-	+	-	-	-	-	-	+	-	-	-	-	-	-	+	-	-
44013-19-S002	PRJDB15501	SAMD00591423	DRR456830	2019-12-12	male	41y	blood	unknown	West Japan	Oita	SC1	2725	1	1	41	1	1	1	1	1	t1784	IVa	-	+	-	-	-	-	-	-	+	-	-	+	-	-	-	-	-	+	-	-	-	-	-	-	+	-	-
46001-19-S001	PRJDB15501	SAMD00591424	DRR456831	2019-04-18	male	81y	blood	unknown	West Japan	Kagoshima	SC1	1	1	1	1	1	1	1	1	1	t7744	IVa	-	-	-	-	-	-	-	-	+	-	-	-	-	-	-	-	-	-	-	-	-	-	-	-	+	-	-
46001-19-S003	PRJDB15501	SAMD00591425	DRR456832	2019-04-20	male	71y	blood	unknown	West Japan	Kagoshima	SC1	7500	1	1	1	1	895	1	1	1	t7744	IVa	-	-	-	-	-	-	-	-	+	-	-	-	-	-	-	-	-	-	-	-	-	-	-	-	+	-	-
46001-19-S004	PRJDB15501	SAMD00591426	DRR456833	2019-04-23	female	78y	blood	urinary-tract infection	West Japan	Kagoshima	SC3	8	3	3	1	1	4	4	3	8	t1888	IVj	-	-	-	-	-	-	-	-	-	-	-	-	-	-	-	-	-	-	-	-	-	-	-	-	+	-	-
46001-19-S006	PRJDB15501	SAMD00591427	DRR456834, DRR546393	2019-04-26	male	78y	blood	unknown	West Japan	Kagoshima	SC8	764	1	136	1	4	12	1	10	5	t010	IIa	-	-	+	-	-	-	-	+	-	+	-	+	-	+	+	+	+	+	-	-	-	-	-	-	+	-	-
46001-19-S008	PRJDB15501	SAMD00591428	DRR456835	2019-05-02	female	78y	blood	urinary-tract infection	West Japan	Kagoshima	SC3	8	3	3	1	1	4	4	3	8	t1888	IV	-	-	-	-	-	-	-	-	-	-	-	-	-	-	-	-	-	-	-	-	-	-	-	-	+	-	-
46001-19-S013	PRJDB15501	SAMD00591429	DRR456836	2019-05-30	female	58ｙ	blood	device-related infection	West Japan	Kagoshima	SC1	1	1	1	1	1	1	1	1	1	t7744	IVa	-	-	-	-	-	-	-	-	+	-	-	-	-	-	-	-	-	-	-	-	-	-	-	-	+	-	-
46001-19-S016	PRJDB15501	SAMD00591430	DRR456837	2019-06-06	female	90y	blood	device-related infection	West Japan	Kagoshima	SC1	1	1	1	1	1	1	1	1	1	t1784	IVa	-	+	-	-	-	-	-	-	+	-	-	+	-	-	-	-	-	+	-	-	-	-	-	-	+	-	-
46001-19-S018	PRJDB15501	SAMD00591431	DRR456838	2019-06-14	male	86y	blood	device-related infection	West Japan	Kagoshima	SC4	15	13	13	1	1	12	11	13	15	t3345	-	-	-	-	-	-	-	-	-	-	-	-	-	-	-	-	-	-	-	-	-	-	-	-	-	+	-	-
46001-19-S020	PRJDB15501	SAMD00591432	DRR456839	2019-06-21	female	90y	blood	unknown	West Japan	Kagoshima	SC6	97	3	1	1	1	1	5	3	97	t224	-	-	-	-	-	-	-	-	-	-	-	-	-	-	-	-	-	-	-	-	-	-	-	-	-	+	-	-
46001-19-S021	PRJDB15501	SAMD00591433	DRR456840	2019-06-21	female	44y	blood	pneumonia	West Japan	Kagoshima	SC9	45	10	14	8	6	10	3	2	45	t880	-	-	-	-	-	-	-	-	+	-	+	-	-	-	+	+	+	-	-	-	-	-	-	-	+	+	-	-
46001-19-S024	PRJDB15501	SAMD00591434	DRR456841	2019-06-24	male	63y	blood	skin and soft tissue infection	West Japan	Kagoshima	SC4	15	13	13	1	1	12	11	13	15	t3345	-	-	-	-	-	-	-	-	-	-	-	-	-	-	-	-	-	-	-	-	-	-	-	-	-	+	-	-
46001-19-S026	PRJDB15501	SAMD00591435	DRR456842	2019-07-10	male	64y	blood	infectious endocarditis	West Japan	Kagoshima	SC3	8	3	3	1	1	4	4	3	8	t1767	IVl	-	-	-	+	-	-	+	-	-	-	-	-	+	-	-	-	+	-	-	-	-	-	-	-	+	-	-
46001-19-S029	PRJDB15501	SAMD00591436	DRR456843	2019-07-19	female	74y	blood	skin and soft tissue infection	West Japan	Kagoshima	SC3	8	3	3	1	1	4	4	3	8	ND	IVj	-	-	-	-	-	-	-	-	-	-	-	-	-	-	-	-	+	-	-	-	-	-	-	-	+	-	-
46001-19-S031	PRJDB15501	SAMD00591437	DRR456844	2019-08-16	female	78y	blood	skin and soft tissue infection	West Japan	Kagoshima	SC1	1	1	1	1	1	1	1	1	1	t1784	IVa	-	+	-	-	-	-	-	-	+	-	-	+	-	-	-	-	-	-	-	-	-	-	-	-	+	-	-
46001-19-S039	PRJDB15501	SAMD00591438	DRR456845	2019-09-26	female	57y	blood	urinary-tract infection	West Japan	Kagoshima	SC8	-	1	788?	1	4	12	1	10	5	t187	IVj	-	-	-	-	-	-	-	+	-	-	-	-	-	+	+	+	-	-	-	-	-	-	-	-	+	-	-
46001-19-S041	PRJDB15501	SAMD00591439	DRR456846	2019-09-27	female	51y	blood	unknown	West Japan	Kagoshima	SC6	97	3	1	1	1	1	5	3	97	t5727	-	-	-	-	-	-	-	-	-	-	-	-	-	-	-	-	-	-	-	-	-	-	-	-	-	+	-	-
46001-19-S047	PRJDB15501	SAMD00591440	DRR456847	2019-10-29	male	79y	blood	unknown	West Japan	Kagoshima	SC8	5	1	4	1	4	12	1	10	5	t187	IVj	-	-	-	-	-	-	-	+	-	+	-	-	-	+	+	+	-	-	-	-	-	-	-	-	+	-	-
46001-19-S049	PRJDB15501	SAMD00591441	DRR456848	2019-11-01	female	76y	blood	bone infection	West Japan	Kagoshima	SC7	12	1	3	1	8	11	5	11	12	t160	-	-	-	+	-	-	-	-	-	-	-	-	-	-	-	-	-	+	-	-	-	-	-	-	-	+	-	+
46001-19-S055	PRJDB15501	SAMD00591442	DRR456849, DRR546394	2019-11-25	male	77y	blood	unknown	West Japan	Kagoshima	SC8	764	1	136	1	4	12	1	10	5	t002	IIa	-	-	-	-	-	-	-	+	-	+	-	+	-	+	+	+	-	+	-	-	-	-	-	-	+	-	-
46001-19-S057	PRJDB15501	SAMD00591443	DRR456850	2019-11-28	female	75y	blood	intra-abdominal infection	West Japan	Kagoshima	SC12	121	6	5	6	2	7	14	5	121	t3025	-	-	-	-	-	-	-	-	+	-	+	-	-	-	+	-	+	-	-	-	-	-	-	-	-	+	+	+
46001-19-S059	PRJDB15501	SAMD00591444	DRR456851	2019-12-02	female	76y	blood	infectious endocarditis	West Japan	Kagoshima	SC4	7501	13	13	1	260	12	11	13	15	t368	-	-	-	-	-	-	-	-	-	-	-	-	-	-	-	-	-	-	-	-	-	-	-	-	-	+	-	-
46001-19-S060	PRJDB15501	SAMD00591445	DRR456852, DRR546395	2019-12-01	male	77y	blood	unknown	West Japan	Kagoshima	SC8	764	1	136	1	4	12	1	10	5	t002	IIa	-	-	-	-	-	-	-	+	-	+	-	+	-	+	+	+	-	+	-	-	-	-	-	-	+	-	-
46001-19-S064	PRJDB15501	SAMD00591446	DRR456853	2020-01-21	female	70y	blood	pneumonia	West Japan	Kagoshima	SC6	97	3	1	1	1	1	5	3	97	t4704	-	-	-	-	-	-	-	-	-	-	-	-	-	-	-	-	-	-	-	-	-	-	-	-	-	+	-	-
46001-19-S068	PRJDB15501	SAMD00591447	DRR456854	2020-02-02	male	72y	blood	skin and soft tissue infection	West Japan	Kagoshima	SC4	15	13	13	1	1	12	11	13	15	t3345	-	-	-	-	-	-	-	-	-	-	-	-	-	-	-	-	-	-	-	-	-	-	-	-	-	+	-	-
46001-19-S069	PRJDB15501	SAMD00591448	DRR456855	2020-02-26	male	80y	blood	unknown	West Japan	Kagoshima	SC9	508	10	40	8	6	10	3	2	508	t1008	-	-	-	-	+	-	-	+	+	-	+	-	-	+	+	+	+	-	-	-	-	-	-	-	+	+	-	-
46001-19-S070	PRJDB15501	SAMD00591449	DRR456856	2020-03-08	female	87y	blood	unknown	West Japan	Kagoshima	SC7	12	1	3	1	8	11	5	11	12	t160	-	-	-	+	-	-	-	-	-	-	-	-	-	-	-	-	-	+	-	-	-	-	-	-	-	+	-	+
46001-19-S072	PRJDB15501	SAMD00591450	DRR456857	2020-03-13	male	74y	blood	others	West Japan	Kagoshima	SC6	97	3	1	1	1	1	5	3	97	t267	-	-	-	-	-	-	-	-	-	-	-	-	-	-	-	-	-	-	-	-	-	-	-	-	-	+	-	-
46001-19-S074	PRJDB15501	SAMD00591451	DRR456858	2020-03-13	male	63y	blood	others	West Japan	Kagoshima	SC1	2725	1	1	41	1	1	1	1	1	t1784	IV	-	+	-	-	-	-	-	-	+	-	-	+	-	-	-	-	-	+	-	-	-	-	-	-	+	-	-
46001-19-S076	PRJDB15501	SAMD00591452	DRR456859	2020-03-19	male	57y	blood	unknown	West Japan	Kagoshima	SC3	8	3	3	1	1	4	4	3	8	t622	-	-	-	-	+	-	-	+	-	-	-	-	-	+	-	-	-	-	-	-	-	-	-	-	-	+	-	-
46001-19-S077	PRJDB15501	SAMD00591453	DRR456860	2020-05-15	male	62y	blood	unknown	West Japan	Kagoshima	SC1	1	1	1	1	1	1	1	1	1	t3022	IVa	-	+	-	-	-	-	-	-	+	-	-	+	-	-	-	-	-	+	-	-	-	-	-	-	+	-	-
46001-19-S081	PRJDB15501	SAMD00591454	DRR456861	2020-05-28	male	71y	blood	unknown	West Japan	Kagoshima	SC6	97	3	1	1	1	1	5	3	97	t267	-	-	-	-	-	-	-	-	-	-	-	-	-	-	-	-	-	-	-	-	-	-	-	-	-	+	-	-
46001-19-S082	PRJDB15501	SAMD00591455	DRR456862	2020-05-29	male	53y	blood	others	West Japan	Kagoshima	SC4	4278	13	644	1	1	12	11	13	15	t3345	-	-	-	-	-	-	-	-	-	-	-	-	-	-	-	-	-	-	-	-	-	-	-	-	-	+	-	-
46001-19-S087	PRJDB15501	SAMD00591456	DRR456863	2020-06-15	male	87y	blood	pneumonia	West Japan	Kagoshima	SC8	5	1	4	1	4	12	1	10	5	t548	-	-	-	-	-	-	-	-	+	-	+	-	-	-	+	+	+	-	-	-	-	-	-	-	-	+	-	-
46001-19-S088	PRJDB15501	SAMD00591457	DRR456864, DRR546396	2020-06-22	male	92y	blood	unknown	West Japan	Kagoshima	SC8	764	1	136	1	4	12	1	10	5	t002	IIa	-	-	-	-	-	-	-	+	-	+	-	+	-	+	+	+	-	+	-	-	-	-	-	-	+	-	-
46001-19-S090	PRJDB15501	SAMD00591458	DRR456865	2020-06-29	female	55y	blood	skin and soft tissue infection	West Japan	Kagoshima	SC9	508	10	40	8	6	10	3	2	508	t2277	-	-	-	-	-	-	-	-	+	-	+	-	-	-	+	+	+	-	-	-	-	-	-	-	+	+	-	-
46008-19-S001	PRJDB15501	SAMD00591459	DRR456866	2019-11-14	female	78y	blood	urinary-tract infection	West Japan	Kagoshima	SC9	7502	10	40	8	6	10	3	996	508	t2334	-	-	-	-	-	-	-	-	+	-	+	-	-	-	+	-	+	-	-	-	-	-	-	-	+	+	-	-
46008-19-S002	PRJDB15501	SAMD00591460	DRR456867	2020-05-16	male	81y	blood	device-related infection	West Japan	Kagoshima	SC5	20	4	9	1	8	1	10	8	20	t3277	-	-	-	-	-	-	-	-	+	-	+	-	-	-	+	+	+	-	-	-	-	-	-	-	-	+	+	-
46008-19-S003	PRJDB15501	SAMD00591461	DRR456868	2020-06-01	female	89y	blood	unknown	West Japan	Kagoshima	SC4	15	13	13	1	1	12	11	13	15	t3345	-	-	-	-	-	-	-	-	-	-	-	-	-	-	-	-	-	-	-	-	-	-	-	-	-	+	-	-
46008-19-S004	PRJDB15501	SAMD00591462	DRR456869, DRR457495	2020-06-18	female	88y	blood	unknown	West Japan	Kagoshima	SC8	764	1	136	1	4	12	1	10	5	t002	IIa	-	-	+	-	-	-	-	+	-	+	-	+	-	+	+	+	-	+	-	-	-	-	-	-	+	-	-
46008-19-S005	PRJDB15501	SAMD00591463	DRR456870	2020-06-23	female	80y	blood	unknown	West Japan	Kagoshima	SC2	188	3	1	1	8	1	1	1	188	t189	-	-	-	+	-	-	-	-	-	-	-	-	-	-	-	-	-	-	-	-	-	-	-	-	-	+	-	-
46008-19-S006	PRJDB15501	SAMD00591464	DRR456871, DRR546397	2020-06-23	male	78y	blood	pneumonia	West Japan	Kagoshima	SC8	764	1	136	1	4	12	1	10	5	t062	IIa	-	-	+	-	-	-	-	+	-	+	-	+	-	+	+	+	-	+	-	-	-	-	-	-	+	-	-
46008-19-S007	PRJDB15501	SAMD00591465	DRR456872	2020-07-14	female	93y	blood	pneumonia	West Japan	Kagoshima	SC1	1	1	1	1	1	1	1	1	1	t1784	IVa	-	+	-	-	-	-	-	-	+	-	-	+	-	-	-	-	-	+	-	-	-	-	-	-	+	-	-
46008-19-S008	PRJDB15501	SAMD00591466	DRR456873	2020-08-19	female	72y	blood	unknown	West Japan	Kagoshima	SC2	188	3	1	1	8	1	1	1	188	t189	-	-	-	-	-	-	-	-	-	-	-	-	-	-	-	-	-	-	-	-	-	-	-	-	-	+	-	-
*The presence of VFGs of S. aureus was analyzed by a blastn search against the assembled genome sequences, and the presence/absence decision was made with the thresholds of sequence identity ≥ 95% and coverage ≥ 80%.
**The presence and mutation of antimicrobial resistance genes were detected and using ResFinder 4.1 with the ResFinder database 2022-05-24 and PointFinder database 2021-02-01, and default parameters.
-; negative, +; positive
[truncated: 80 more columns]

## Sheet: Supplementary Table 2
Supplementary Table 2. Metadata of 183 S. aureus isolates in YK-collection (1994-2000).																					VFGs*
ID	BioProject accession#	BioSample accession#	Run accession#	isolate_date	Sex	Age	source	BAPS No.	ST	arcC	aroE	glpF	gmk	pta	tpi	yqiL	CC	spa type	SCCmec type	ACME	sea	seb	sec	sed	see	tst1	seg	seh	sei	selj	sek	sel	sem	sen	seo	sep	seq	ser	ses	set	seu	sev	selw	selx	sey	selz	se1	lukF-PV	lukS-PV
JARB-D00P0001	PRJDB15501	SAMD00591467	DRR456874	2000-02-29	male	87	blood	SC9	89	1	26	28	18	18	33	50	89	ND	-	-	-	-	-	-	-	-	-	-	-	-	-	-	+	-	+	-	-	-	-	-	-	-	-	+	-	+	-	-	-
JARB-D00P0002	PRJDB15501	SAMD00591468	DRR456875	2000-04-14	female	60	blood	SC4	20	4	9	1	8	1	10	8	20	t164	-	-	-	-	+	-	-	-	+	-	+	-	-	+	+	+	+	-	-	-	-	-	-	-	-	+	+	-	-	-	-
JARB-D00P0030	PRJDB15501	SAMD00591469	DRR456876	2000-05-27	male	60	blood	SC3	-	3	1	1	8	1	~1	1	188	t8275	-	-	-	-	-	-	-	-	-	-	-	-	-	-	-	-	-	-	-	-	-	-	-	-	-	+	-	-	-	-	-
JARB-D00P0033	PRJDB15501	SAMD00591470	DRR456877	2000-05-30	female	65	blood	SC9	30	2	2	2	2	6	3	2	30	t012	-	-	-	-	-	-	-	+	+	-	+	-	-	-	+	+	+	-	-	-	-	-	+	-	+	.	-	-	-	-	-
JARB-D00P0053	PRJDB15501	SAMD00591471	DRR456878	2000-06-21	male	53	blood	SC4	1	1	1	1	1	1	1	1	1	t127	-	-	+	-	-	-	-	-	-	+	-	-	+	-	-	-	-	-	+	-	-	-	-	-	-	+	-	-	-	-	-
JARB-D00P0084	PRJDB15501	SAMD00591472	DRR456879	2000-07-26	female	49	blood	SC2	8	3	3	1	1	4	4	3	8	ND	-	-	-	-	-	-	-	-	-	-	-	-	-	-	-	-	-	-	-	-	-	-	-	-	-	+	-	-	-	-	-
JARB-D00P0090	PRJDB15501	SAMD00591473	DRR456880	2000-08-03	male	51	blood	SC1	5	1	4	1	4	12	1	10	5	t179	-	-	-	-	-	-	-	-	+	-	+	-	-	-	+	+	+	+	-	-	-	-	-	-	-	+	-	-	-	-	-
JARB-D00P0092	PRJDB15501	SAMD00591474	DRR456881	2000-08-03	male	51	blood	SC1	5	1	4	1	4	12	1	10	5	t179	-	-	-	-	-	-	-	-	+	-	+	-	-	-	+	+	+	+	-	-	-	-	-	-	-	+	-	-	-	-	-
JARB-D00P0127	PRJDB15501	SAMD00591475	DRR456882	2000-08-03	female	67	blood	SC10	101	3	1	14	15	11	19	3	101	t528	-	-	-	-	-	-	-	-	-	-	-	-	-	-	-	-	-	-	-	-	-	-	-	-	-	+	-	-	-	-	-
JARB-D00P0158	PRJDB15501	SAMD00591476	DRR456883	2000-09-04	female	21	blood	SC5	15	13	13	1	1	12	11	13	15	t094	-	-	-	-	-	-	-	-	-	-	-	-	-	-	-	-	-	-	-	-	-	-	-	-	-	+	-	-	-	-	-
JARB-D00P0166	PRJDB15501	SAMD00591477	DRR456884	2000-09-18	female	34	blood	SC1	5	1	4	1	4	12	1	10	5	ND	-	-	+	-	-	-	-	-	+	-	+	-	-	-	+	-	+	-	-	-	-	-	-	-	-	+	-	-	-	-	-
JARB-D00P0181	PRJDB15501	SAMD00591478	DRR456885	2000-09-25	female	48	blood	SC4	81	1	1	1	9	1	1	1	81	t693	-	-	+	+	-	-	-	-	-	+	-	-	+	-	-	-	-	-	+	-	-	-	-	-	-	+	-	-	-	-	-
JARB-D00P0214	PRJDB15501	SAMD00591479	DRR456886	2000-05-08	female	75	blood	SC1	5	1	4	1	4	12	1	10	5	ND	-	-	-	+	-	-	-	-	+	-	+	-	+	-	+	+	+	-	+	-	-	-	-	-	-	+	-	-	-	-	-
JARB-D00P0215	PRJDB15501	SAMD00591480	DRR456887	2000-05-15	male	69	blood	SC2	-	3	3	1	1	4?	4	3	8	t1767	-	-	-	-	-	-	-	-	-	-	-	-	-	-	-	-	-	+	-	-	-	-	-	-	-	+	-	-	-	-	-
JARB-D00P0216	PRJDB15501	SAMD00591481	DRR456888	2000-05-16	female	18	blood	SC7	-	22	1	14	23	~691	4	31	88	t186	-	-	-	-	+	-	-	-	-	-	-	-	-	+	-	-	-	-	-	-	-	-	-	-	-	+	-	-	-	-	-
JARB-D00P0222	PRJDB15501	SAMD00591482	DRR456889	2000-05-15	male	50	blood	SC2	-	3	3	1	1	4?	4	3	8	t1767	-	-	-	-	-	-	-	-	-	-	-	-	-	-	-	-	-	+	-	-	-	-	-	-	-	+	-	-	-	-	-
JARB-D00P0229	PRJDB15501	SAMD00591483	DRR456890	2000-07-24	female	75	blood	SC9	30	2	2	2	2	6	3	2	30	t046	-	-	+	-	-	-	-	+	+	-	+	-	-	-	+	-	+	-	-	-	-	-	+	-	+	.	-	-	-	-	-
JARB-D00P0242	PRJDB15501	SAMD00591484	DRR456891	2000-11-04	male	74	blood	SC2	630	12	3	1	1	4	4	3	8	t377	-	-	-	-	-	-	-	-	-	-	-	-	-	-	-	-	-	-	-	-	-	-	-	-	-	+	-	-	-	-	-
JARB-D00P0265	PRJDB15501	SAMD00591485	DRR456892	2000-06-27	male	68	blood	SC6	12	1	3	1	8	11	5	11	12	t4456	-	-	-	+	-	-	-	-	-	-	-	-	-	-	-	-	-	+	-	-	-	-	-	-	-	+	-	+	-	-	-
JARB-D00P0273	PRJDB15501	SAMD00591486	DRR456893	2000-07-26	male	30	blood	SC4	20	4	9	1	8	1	10	8	20	t8412	-	-	-	-	-	-	-	-	+	-	+	-	-	-	+	-	+	-	-	-	-	-	-	-	-	+	+	-	-	-	-
JARB-D00P0313	PRJDB15501	SAMD00591487	DRR456894	2000-05-09	male	77	blood	SC5	15	13	13	1	1	12	11	13	15	ND	-	-	-	-	-	-	-	-	-	-	-	-	-	-	-	-	-	-	-	-	-	-	-	-	-	+	-	-	-	-	-
JARB-D00P0315	PRJDB15501	SAMD00591488	DRR456895	2000-05-16	male	14	blood	SC1	5	1	4	1	4	12	1	10	5	t6352	IVa	-	+	-	-	-	-	-	+	-	+	-	-	-	+	+	+	-	-	-	-	-	-	-	-	+	-	-	-	-	-
JARB-D00P0344	PRJDB15501	SAMD00591489	DRR456896	2000-10-03	female	46	blood	SC5	15	13	13	1	1	12	11	13	15	t1038	-	-	-	-	-	-	-	-	-	-	-	-	-	-	-	-	-	-	-	-	-	-	-	-	-	+	-	-	-	-	-
JARB-D00P0362	PRJDB15501	SAMD00591490	DRR456897	2000-10-08	female		blood	SC3	188	3	1	1	8	1	1	1	188	t189	-	-	-	-	-	-	-	-	-	-	-	-	-	-	-	-	-	-	-	-	-	-	-	-	-	+	-	-	-	-	-
JARB-D00P0398	PRJDB15501	SAMD00591491	DRR456898	2000-06-22	female		blood	SC4	20	4	9	1	8	1	10	8	20	t3277	-	-	-	+	-	-	-	-	+	-	+	-	-	-	+	+	+	-	-	-	-	-	-	-	-	+	+	-	-	-	-
JARB-D00P0401	PRJDB15501	SAMD00591492	DRR456899	2000-07-31	male		blood	SC3	188	3	1	1	8	1	1	1	188	t189	-	-	-	-	-	-	-	-	-	-	-	-	-	-	-	-	-	-	-	-	-	-	-	-	-	+	-	-	-	-	-
JARB-D00P0403	PRJDB15501	SAMD00591493	DRR456900	2000-10-05	male		blood	SC2	8	3	3	1	1	4	4	3	8	ND	-	-	-	-	-	-	-	-	-	-	-	-	-	-	-	-	-	-	-	-	-	-	-	-	-	+	-	-	-	-	-
JARB-D00P0404	PRJDB15501	SAMD00591494	DRR456901	2000-10-05	male		blood	SC4	25	4	1	4	1	5	5	4	25	t1439	-	-	-	+	-	-	-	-	+	-	+	-	-	-	+	+	+	-	-	-	-	-	-	-	+	+	-	-	-	-	-
JARB-D00P0437	PRJDB15501	SAMD00591495	DRR456902	2000-10-31	male	62	blood	SC2	8	3	3	1	1	4	4	3	8	t11474	-	-	-	-	-	-	-	-	-	-	-	-	-	-	-	-	-	+	-	-	-	-	-	-	-	+	-	-	+	-	-
JARB-D00P0439	PRJDB15501	SAMD00591496	DRR456903	2000-10-28	female	69	blood	SC3	188	3	1	1	8	1	1	1	188	t189	-	-	-	-	-	-	-	-	-	-	-	-	-	-	-	-	-	-	-	-	-	-	-	-	-	+	-	-	-	-	-
JARB-D00P0440	PRJDB15501	SAMD00591497	DRR456904	2000-06-20	male	72	blood	SC8	508	10	40	8	6	10	3	2	508	t630	-	-	-	-	-	-	-	-	+	-	+	-	-	-	+	+	+	-	-	-	-	-	-	-	+	+	-	-	-	-	-
JARB-D00P0454	PRJDB15501	SAMD00591498	DRR456905	2000-07-22	female	16	blood	SC4	-	~4	9	1	8	1	10	8	20	t3277	-	-	-	-	-	-	-	-	+	-	+	-	-	-	+	+	+	-	-	-	-	-	-	-	-	+	+	-	-	-	-
JARB-D00P0508	PRJDB15501	SAMD00591499	DRR456906	2000-10-07	male	82	blood	SC5	15	13	13	1	1	12	11	13	15	t593	-	-	-	-	-	-	-	-	-	-	-	-	-	-	-	-	-	-	-	-	-	-	-	-	-	+	-	-	-	-	-
JARB-D00P0512	PRJDB15501	SAMD00591500	DRR456907	2000-11-04	male	30	blood	SC5	15	13	13	1	1	12	11	13	15	t084	-	-	-	-	-	-	-	-	-	-	-	-	-	-	-	-	-	-	-	-	-	-	-	-	-	+	-	-	-	-	-
JARB-D00P0514	PRJDB15501	SAMD00591501	DRR456908	2000-02-25	female	37	blood	SC6	12	1	3	1	8	11	5	11	12	t160	-	-	-	-	-	-	-	-	-	-	-	-	-	-	-	-	-	+	-	-	-	-	-	-	-	+	-	+	-	-	-
JARB-D00P0516	PRJDB15501	SAMD00591502	DRR456909	2000-04-03	male	30	blood	SC6	12	1	3	1	8	11	5	11	12	t771	-	-	-	+	-	-	-	-	-	-	-	-	-	-	-	-	-	+	-	-	-	-	-	-	-	+	-	+	-	-	-
JARB-D00P0517	PRJDB15501	SAMD00591503	DRR456910	2000-04-21	female	48	blood	SC2	8	3	3	1	1	4	4	3	8	t008	-	-	-	-	-	-	-	-	-	-	-	-	-	-	-	-	-	-	-	-	-	-	-	-	-	+	-	-	-	-	-
JARB-D00P0518	PRJDB15501	SAMD00591504	DRR456911	2000-05-29	male	21	blood	SC3	188	3	1	1	8	1	1	1	188	t189	-	-	-	-	-	-	-	-	-	-	-	-	-	-	-	-	-	-	-	-	-	-	-	-	-	+	-	-	-	-	-
JARB-D00P0519	PRJDB15501	SAMD00591505	DRR456912	2000-05-29	female	3	blood	SC8	508	10	40	8	6	10	3	2	508	t133	-	-	-	-	-	-	-	-	+	-	+	-	-	-	+	+	+	-	-	-	-	-	-	-	+	+	-	-	-	-	-
JARB-D00P0522	PRJDB15501	SAMD00591506	DRR456913	2000-06-14	male	78	blood	SC5	-	~13	13	1	1	12	11	13	15	t084	-	-	-	-	-	-	-	-	-	-	-	-	-	-	-	-	-	-	-	-	-	-	-	-	-	+	-	-	-	-	-
JARB-D00P0524	PRJDB15501	SAMD00591507	DRR456914	2000-08-09	female	41	blood	SC6	789	3	4	1	4	4	6	3	5	t2616	-	-	-	-	-	-	-	-	-	-	-	-	-	-	-	-	-	+	-	-	-	-	-	-	-	+	-	-	-	-	-
JARB-D00P0550	PRJDB15501	SAMD00591508	DRR456915	2000-02-10	female	34	blood	SC1	5	1	4	1	4	12	1	10	5	t002	IIa	-	-	-	+	-	-	+	+	-	+	-	-	+	+	+	+	-	-	-	-	-	-	-	-	+	-	-	-	-	-
JARB-D00P0551	PRJDB15501	SAMD00591509	DRR456916	2000-03-07	female	68	blood	SC1	5	1	4	1	4	12	1	10	5	t002	IIa	-	+	-	+	-	-	+	+	-	+	-	-	+	+	+	+	-	-	-	-	-	-	-	-	+	-	-	-	-	-
JARB-D00P0552	PRJDB15501	SAMD00591510	DRR456917	2000-04-05	male	63	blood	SC1	5	1	4	1	4	12	1	10	5	t002	IIa	-	-	-	+	-	-	+	+	-	+	-	-	+	+	+	+	-	-	-	-	-	-	-	-	+	-	-	-	-	-
JARB-D00P0656	PRJDB15501	SAMD00591511	DRR456918	2000-08-09	female	28	blood	SC1	5	1	4	1	4	12	1	10	5	t688	IIa	-	-	-	+	-	-	+	+	-	+	-	-	+	+	+	+	+	-	-	-	-	-	-	-	+	-	-	-	-	-
JARB-D00P0733	PRJDB15501	SAMD00591512	DRR456919	2000-09-11	male	73	blood	SC1	5	1	4	1	4	12	1	10	5	t062	IIa	-	-	-	+	-	-	+	+	-	+	-	-	+	+	+	+	-	-	-	-	-	-	-	-	+	-	-	-	-	-
JARB-D00P0735	PRJDB15501	SAMD00591513	DRR456920	2000-09-16	male	85	blood	SC1	5	1	4	1	4	12	1	10	5	-	IIa	-	-	-	+	-	-	+	+	-	+	-	-	+	+	+	+	+	-	-	-	-	-	-	-	+	-	-	-	-	-
JARB-D00P0736	PRJDB15501	SAMD00591514	DRR456921	2000-09-16	male	69	blood	SC1	5	1	4	1	4	12	1	10	5	t002	IIa	-	-	-	+	-	-	+	+	-	+	-	-	+	+	+	+	-	-	-	-	-	-	-	-	+	-	-	-	-	-
JARB-D00P0738	PRJDB15501	SAMD00591515	DRR456922	2000-08-25	male	65	blood	SC1	5	1	4	1	4	12	1	10	5	t002	IIa	-	-	-	+	-	-	+	+	-	+	-	-	+	+	+	+	-	-	-	-	-	-	-	-	+	-	-	-	-	-
JARB-D00P0739	PRJDB15501	SAMD00591516	DRR456923	2000-08-23	male	81	blood	SC1	5	1	4	1	4	12	1	10	5	t9969	IIa	-	-	-	+	-	-	+	+	-	+	-	-	+	+	+	+	-	-	-	-	-	-	-	-	+	-	-	-	-	-
JARB-D00P0758	PRJDB15501	SAMD00591517	DRR456924	2000-10-03	female	100	blood	SC1	1619	1	4	1	23	12	1	10	5	-	IIa	-	-	-	+	-	-	+	+	-	+	-	-	+	+	+	+	+	-	-	-	-	-	-	-	+	-	-	-	-	-
JARB-D00P0779	PRJDB15501	SAMD00591518	DRR456925	2000-05-23	female	71	blood	SC1	5	1	4	1	4	12	1	10	5	t071	IIa	-	-	-	+	-	-	+	+	-	+	-	-	+	+	+	+	-	-	-	-	-	-	-	-	+	-	-	-	-	-
JARB-D00P0790	PRJDB15501	SAMD00591519	DRR456926	2000-05-29	male		blood	SC1	5	1	4	1	4	12	1	10	5	t002	IIa	-	-	-	+	-	-	+	+	-	-	-	-	+	+	+	+	+	-	-	-	-	-	-	-	+	-	-	-	-	-
JARB-D00P0792	PRJDB15501	SAMD00591520	DRR456927	2000-07-25	male	52	blood	SC1	5	1	4	1	4	12	1	10	5	t010	IIa	-	-	-	+	-	-	+	+	-	+	-	-	+	+	+	+	-	-	-	-	-	-	-	-	+	-	-	-	-	-
JARB-D00P0796	PRJDB15501	SAMD00591521	DRR456928	2000-08-28	male	69	blood	SC1	5	1	4	1	4	12	1	10	5	t002	IIa	-	-	-	+	-	-	+	+	-	+	-	-	+	+	+	+	-	-	-	-	-	-	-	-	+	-	-	-	-	-
JARB-D00P0797	PRJDB15501	SAMD00591522	DRR456929	2000-09-26	female	69	blood	SC2	8	3	3	1	1	4	4	3	8	t2558	IVa	-	-	-	-	-	-	-	-	-	-	-	-	-	-	-	-	-	-	-	-	-	-	-	-	+	-	-	-	-	-
JARB-D00P0933	PRJDB15501	SAMD00591523	DRR456930	2000-01-08	male	2	blood	SC1	5	1	4	1	4	12	1	10	5	t002	IIa	-	-	-	+	-	-	+	+	-	+	-	-	+	+	+	+	-	-	-	-	-	-	-	-	+	-	-	-	-	-
JARB-D00P0968	PRJDB15501	SAMD00591524	DRR456931	2000-03-02	male		blood	SC1	5	1	4	1	4	12	1	10	5	t062	IIa	-	-	-	+	-	-	+	+	-	+	-	-	+	+	+	+	-	-	-	-	-	-	-	-	+	-	-	-	-	-
JARB-D00P0969	PRJDB15501	SAMD00591525	DRR456932	2000-03-02	male		blood	SC1	5	1	4	1	4	12	1	10	5	t002	IIa	-	-	-	+	-	-	+	+	-	+	-	-	+	+	+	+	-	-	-	-	-	-	-	-	+	-	-	-	-	-
JARB-D00P0970	PRJDB15501	SAMD00591526	DRR456933	2000-03-04	male		blood	SC1	5	1	4	1	4	12	1	10	5	t002	IIa	-	-	-	+	-	-	+	+	-	+	-	-	+	+	+	+	-	-	-	-	-	-	-	-	+	-	-	-	-	-
JARB-D00P0971	PRJDB15501	SAMD00591527	DRR456934	2000-03-20	male		blood	SC1	5	1	4	1	4	12	1	10	5	t062	IIa	-	-	-	+	-	-	+	+	-	+	-	-	+	+	+	+	-	-	-	-	-	-	-	-	+	-	-	-	-	-
JARB-D00P0972	PRJDB15501	SAMD00591528	DRR456935	2000-04-04	male		blood	SC1	5	1	4	1	4	12	1	10	5	t668	IIa	-	-	-	+	-	-	+	+	-	+	-	-	+	+	+	+	+	-	-	-	-	-	-	-	+	-	-	-	-	-
JARB-D00P0973	PRJDB15501	SAMD00591529	DRR456936	2000-05-27	male		blood	SC1	5	1	4	1	4	12	1	10	5	t002	IIa	-	-	-	+	-	-	+	+	-	+	-	-	+	+	+	+	-	-	-	-	-	-	-	-	+	-	-	-	-	-
JARB-D00P0974	PRJDB15501	SAMD00591530	DRR456937	2000-06-05	male		blood	SC1	5	1	4	1	4	12	1	10	5	t002	IIa	-	-	-	+	-	-	+	+	-	+	-	-	+	+	+	+	+	-	-	-	-	-	-	-	+	-	-	-	-	-
JARB-D00P0975	PRJDB15501	SAMD00591531	DRR456938	2000-06-10	male		blood	SC1	5	1	4	1	4	12	1	10	5	t002	IIa	-	-	+	-	-	-	-	+	-	+	-	-	-	+	+	+	+	-	-	-	-	-	-	-	+	-	-	-	-	-
JARB-D00P0976	PRJDB15501	SAMD00591532	DRR456939	2000-06-20	male		blood	SC1	5	1	4	1	4	12	1	10	5	t002	IIa	-	-	-	+	-	-	+	+	-	+	-	-	+	+	+	+	-	-	-	-	-	-	-	-	+	-	-	-	-	-
JARB-D00P0977	PRJDB15501	SAMD00591533	DRR456940	2000-06-23	male		blood	SC1	5	1	4	1	4	12	1	10	5	-	IIa	-	-	-	+	-	-	+	+	-	+	-	-	+	+	+	+	+	-	-	-	-	-	-	-	+	-	-	-	-	-
JARB-D00P0978	PRJDB15501	SAMD00591534	DRR456941	2000-07-03	male		blood	SC1	5	1	4	1	4	12	1	10	5	t002	IIa	-	-	-	+	-	-	+	+	-	+	-	-	+	+	+	+	-	-	-	-	-	-	-	-	+	-	-	-	-	-
JARB-D00P0979	PRJDB15501	SAMD00591535	DRR456942	2000-07-24	male		blood	SC1	5	1	4	1	4	12	1	10	5	t109	I	-	+	+	-	-	-	-	+	-	+	-	+	-	+	-	+	-	+	-	-	-	-	-	-	+	-	-	-	-	-
JARB-D00P0980	PRJDB15501	SAMD00591536	DRR456943	2000-09-14	male		blood	SC9	3618	437	2	2	2	6	3	2	30	t1504	IVk	-	+	-	-	-	-	-	+	-	+	-	-	-	+	+	+	-	-	-	-	-	+	-	+	-	-	-	-	-	-
JARB-D00P0981	PRJDB15501	SAMD00591537	DRR456944	2000-09-30	male		blood	SC1	5	1	4	1	4	12	1	10	5	t002	IIa	-	-	-	+	-	-	+	+	-	+	-	-	+	+	+	+	-	-	-	-	-	-	-	-	+	-	-	-	-	-
JARB-D00P1010	PRJDB15501	SAMD00591538	DRR456945	2000-09-14	male	74	blood	SC1	5	1	4	1	4	12	1	10	5	t010	IIa	-	-	-	+	-	-	+	+	-	+	-	-	+	+	+	+	-	-	-	-	-	-	-	-	+	-	-	-	-	-
JARB-D00P1021	PRJDB15501	SAMD00591539	DRR456946	2000-09-06	male	59	blood	SC1	5	1	4	1	4	12	1	10	5	t002	IIa	-	-	-	+	-	-	+	+	-	+	-	-	+	+	+	+	-	-	-	-	-	-	-	-	+	-	-	-	-	-
JARB-D00P1056	PRJDB15501	SAMD00591540	DRR456947	2000-01-01			blood	SC1	5	1	4	1	4	12	1	10	5	t002	IIa	-	-	-	+	-	-	+	+	-	+	-	-	+	+	+	+	-	-	-	-	-	-	-	-	+	-	-	-	-	-
JARB-D00P1124	PRJDB15501	SAMD00591541	DRR456948	2000-05-02	male	74	blood	SC1	5	1	4	1	4	12	1	10	5	t002	IIa	-	-	-	+	-	-	+	+	-	+	-	-	+	+	+	+	+	-	-	-	-	-	-	-	+	-	-	-	-	-
JARB-D94P0003	PRJDB15501	SAMD00591542	DRR456949	1994-08-07	female	50	blood	SC1	5	1	4	1	4	12	1	10	5	t179	-	-	-	-	-	+	-	-	+	-	+	+	-	-	+	+	+	+	-	+	-	-	-	-	-	+	-	-	-	-	-
JARB-D94P0004	PRJDB15501	SAMD00591543	DRR456950	1994-08-08	male	74	blood	SC6	12	1	3	1	8	11	5	11	12	t160	-	-	-	+	-	-	-	-	-	-	-	-	-	-	-	-	-	+	-	-	-	-	-	-	-	+	-	+	-	-	-
JARB-D94P0062	PRJDB15501	SAMD00591544	DRR456951	1994-07-18	male	72	blood	SC8	47	10	11	8	6	10	3	2	45	t728	-	-	-	-	+	+	-	-	+	-	+	+	-	+	+	+	+	-	-	+	-	-	-	-	+	+	-	-	-	-	-
JARB-D94P0106	PRJDB15501	SAMD00591545	DRR456952	1994-07-11	male	43	blood	SC4	81	1	1	1	9	1	1	1	81	t127	-	-	+	+	-	-	-	-	-	+	-	-	+	-	-	-	-	-	+	-	-	-	-	-	-	+	-	-	-	-	-
JARB-D94P0127	PRJDB15501	SAMD00591546	DRR456953	1994-08-03	male	0	blood	SC4	81	1	1	1	9	1	1	1	81	t3269	-	-	+	-	-	-	-	-	-	+	-	-	-	-	-	-	-	-	-	-	-	-	-	-	-	+	-	-	-	-	-
JARB-D94P0181	PRJDB15501	SAMD00591547	DRR456954	1994-09-22	male	45	blood	SC6	12	1	3	1	8	11	5	11	12	t160	-	-	-	+	-	-	-	-	-	-	-	-	-	-	-	-	-	+	-	-	-	-	-	-	-	+	-	+	-	-	-
JARB-D94P0202	PRJDB15501	SAMD00591548	DRR456955	1994-07-18	female	42	blood	SC3	188	3	1	1	8	1	1	1	188	t189	-	-	-	-	-	-	-	-	-	-	-	-	-	-	-	-	-	-	-	-	-	-	-	-	-	+	-	-	-	-	-
JARB-D94P0227	PRJDB15501	SAMD00591549	DRR456956	1994-07-14	male	56	blood	SC4	25	4	1	4	1	5	5	4	25	t078	-	-	-	-	-	-	-	-	+	-	+	-	-	-	+	+	+	-	-	-	-	-	-	-	+	+	-	-	-	-	-
JARB-D94P0343	PRJDB15501	SAMD00591550	DRR456957	1994-09-06		0	blood	SC9	89	1	26	28	18	18	33	50	89	t375	-	-	-	-	-	-	-	-	-	-	-	-	-	-	+	-	+	-	-	-	-	-	-	-	-	+	-	+	-	-	-
JARB-D94P0373	PRJDB15501	SAMD00591551	DRR456958	1994-06-20	male	70	blood	SC1	3081	3	4	1	4	12	1	10	5	t5613	I	-	-	-	-	-	-	-	+	-	+	-	-	-	+	+	+	-	-	-	-	-	-	-	-	+	-	-	-	-	-
JARB-D94P0399	PRJDB15501	SAMD00591552	DRR456959	1994-07-04	female	0	blood	SC1	512	1	102	1	4	12	1	10	5	t002	IIa	-	-	-	+	-	-	+	+	-	+	-	-	+	+	+	+	-	-	-	-	-	-	-	-	+	-	-	-	-	-
JARB-D94P0404	PRJDB15501	SAMD00591553	DRR456960	1994-01-01			blood	SC1	5	1	4	1	4	12	1	10	5	t002	IIa	-	-	-	+	-	-	+	+	-	+	-	-	+	+	+	+	-	-	-	-	-	-	-	-	+	-	-	-	-	-
JARB-D94P0432	PRJDB15501	SAMD00591554	DRR456961	1994-06-20	male	84	blood	SC1	3081	3	4	1	4	12	1	10	5	t5613	I	-	-	-	-	-	-	-	+	-	+	-	-	-	+	+	+	-	-	-	-	-	-	-	-	+	-	-	-	-	-
JARB-D94P0537	PRJDB15501	SAMD00591555	DRR456962	1994-07-28	female		blood	SC1	5	1	4	1	4	12	1	10	5	t105	IIa	-	-	-	+	-	-	+	+	-	+	-	-	+	+	+	+	-	-	-	-	-	-	-	-	+	-	-	-	-	-
JARB-D94P0538	PRJDB15501	SAMD00591556	DRR456963	1994-06-22	male	50	blood	SC1	-	1	4	~87	4	12	1	56	5	t002	IIa	-	-	-	-	-	-	-	+	-	+	-	-	-	+	+	+	-	-	-	-	-	-	-	-	+	-	-	-	-	-
JARB-D94P0539	PRJDB15501	SAMD00591557	DRR456964	1994-07-19	female	78	blood	SC1	5	1	4	1	4	12	1	10	5	t002	IIa	-	-	-	+	-	-	+	+	-	+	-	-	+	+	+	+	-	-	-	-	-	-	-	-	+	-	-	-	-	-
JARB-D94P0580	PRJDB15501	SAMD00591558	DRR456965	1994-07-25	male	35	blood	SC1	5	1	4	1	4	12	1	10	5	t002	IIa	-	-	-	+	-	-	+	+	-	+	-	-	+	+	+	+	+	-	-	-	-	-	-	-	+	-	-	-	-	-
JARB-D94P0597	PRJDB15501	SAMD00591559	DRR456966	1994-01-01			blood	SC1	5	1	4	1	4	12	1	10	5	t002	IIa	-	-	-	+	-	-	+	+	-	+	-	-	+	+	+	+	-	-	-	-	-	-	-	-	+	-	-	-	-	-
JARB-D94P0600	PRJDB15501	SAMD00591560	DRR456967	1994-01-01			blood	SC1	5	1	4	1	4	12	1	10	5	t002	IIa	-	-	-	+	-	-	+	+	-	+	-	-	+	+	+	+	-	-	-	-	-	-	-	-	+	-	-	-	-	-
JARB-D94P0625	PRJDB15501	SAMD00591561	DRR456968	1994-09-09	male	73	blood	SC1	5	1	4	1	4	12	1	10	5	t045	I	-	-	+	-	-	-	-	+	-	+	-	+	-	+	+	+	-	+	-	-	-	-	-	-	+	-	-	-	-	-
JARB-D94P0651	PRJDB15501	SAMD00591562	DRR456969	1994-05-09	male	0	blood	SC7	88	22	1	14	23	12	4	31	88	t729	IVg	-	-	-	-	-	-	-	-	-	-	-	-	-	-	-	-	-	-	-	-	-	-	-	-	+	-	-	-	-	-
JARB-D94P0662	PRJDB15501	SAMD00591563	DRR456970	1994-08-15	male	62	blood	SC1	5	1	4	1	4	12	1	10	5	t002	IIa	-	-	+	+	-	-	+	+	-	+	-	-	+	+	+	+	+	-	-	-	-	-	-	-	+	-	-	-	-	-
JARB-D94P0693	PRJDB15501	SAMD00591564	DRR456971	1994-07-08	male	68	blood	SC1	5	1	4	1	4	12	1	10	5	t1080	IIa	-	-	-	+	-	-	+	+	-	+	-	-	+	+	+	+	+	-	-	-	-	-	-	-	+	-	-	-	-	-
JARB-D94P0700	PRJDB15501	SAMD00591565	DRR456972	1994-07-23		0	blood	SC2	8	3	3	1	1	4	4	3	8	t1767	I	-	-	-	-	-	-	-	-	-	-	-	-	-	-	-	-	+	-	-	-	-	-	-	-	+	-	-	-	-	-
JARB-D94P0702	PRJDB15501	SAMD00591566	DRR456973	1994-01-01			blood	SC1	5	1	4	1	4	12	1	10	5	t1080	IIa	-	-	-	+	-	-	+	+	-	+	-	-	+	+	+	+	+	-	-	-	-	-	-	-	+	-	-	-	-	-
JARB-D96P0005	PRJDB15501	SAMD00591567	DRR456974	1996-08-05	male	76	blood	SC5	15	13	13	1	1	12	11	13	15	t774	-	-	-	-	-	-	-	-	-	-	-	-	-	-	-	-	-	-	-	-	-	-	-	-	-	+	-	-	-	-	-
JARB-D96P0038	PRJDB15501	SAMD00591568	DRR456975	1996-06-17	male	60	blood	SC2	630	12	3	1	1	4	4	3	8	ND	-	-	-	-	-	-	-	-	-	-	-	-	-	-	-	-	-	-	-	-	-	-	-	-	-	+	-	-	-	-	-
JARB-D96P0217	PRJDB15501	SAMD00591569	DRR456976	1996-06-04	male	52	blood	SC3	188	3	1	1	8	1	1	1	188	t189	-	-	-	-	-	-	-	-	-	-	-	-	-	-	-	-	-	-	-	-	-	-	-	-	-	+	-	-	-	-	-
JARB-D96P0218	PRJDB15501	SAMD00591570	DRR456977	1996-07-26	female	57	blood	SC10	101	3	1	14	15	11	19	3	101	t2078	-	-	-	-	-	-	-	-	-	-	-	-	-	-	-	-	-	-	-	-	-	-	-	-	-	+	-	-	-	-	-
JARB-D96P0219	PRJDB15501	SAMD00591571	DRR456978	1996-07-28	male	75	blood	SC2	8	3	3	1	1	4	4	3	8	t1767	-	-	-	-	-	-	-	-	-	-	-	-	-	-	-	-	-	+	-	-	-	-	-	-	-	+	-	-	-	-	-
JARB-D96P0222	PRJDB15501	SAMD00591572	DRR456979	1996-08-21	male	67	blood	SC5	15	13	13	1	1	12	11	13	15	t12014	-	-	-	-	-	-	-	-	-	-	-	-	-	-	-	-	-	-	-	-	-	-	-	-	-	+	-	-	-	-	-
JARB-D96P0223	PRJDB15501	SAMD00591573	DRR456980	1996-08-12	male	83	blood	SC10	101	3	1	14	15	11	19	3	101	t528	-	-	-	-	-	-	-	-	-	-	-	-	-	-	-	-	-	-	-	-	-	-	-	-	-	+	-	-	-	-	-
JARB-D96P0224	PRJDB15501	SAMD00591574	DRR456981	1996-08-18	male	66	blood	SC5	15	13	13	1	1	12	11	13	15	t084	-	-	-	-	-	-	-	-	-	-	-	-	-	-	-	-	-	-	-	-	-	-	-	-	-	+	-	-	-	-	-
JARB-D96P0225	PRJDB15501	SAMD00591575	DRR456982	1996-06-07	male	68	blood	SC3	188	3	1	1	8	1	1	1	188	t189	-	-	-	-	-	-	-	-	-	-	-	-	-	-	-	-	-	-	-	-	-	-	-	-	-	+	-	-	-	-	-
JARB-D96P0226	PRJDB15501	SAMD00591576	DRR456983	1996-01-11	female	84	blood	SC9	121	6	5	6	2	7	14	5	121	t159	-	-	-	+	-	-	-	-	+	-	+	-	-	-	+	+	+	-	-	-	-	-	+	-	-	+	+	+	-	+	+
JARB-D96P0227	PRJDB15501	SAMD00591577	DRR456984	1996-05-17	male	68	blood	SC8	45	10	14	8	6	10	3	2	45	t004	-	-	-	-	-	-	-	-	+	-	+	-	-	-	+	+	+	-	-	-	-	-	-	-	+	+	-	-	-	-	-
JARB-D96P0228	PRJDB15501	SAMD00591578	DRR456985	1996-05-22	female	62	blood	SC3	188	3	1	1	8	1	1	1	188	t189	-	-	-	-	-	-	-	-	-	-	-	-	-	-	-	-	-	-	-	-	-	-	-	-	-	+	-	-	-	-	-
JARB-D96P0229	PRJDB15501	SAMD00591579	DRR456986	1996-06-13	female	66	blood	SC4	25	4	1	4	1	5	5	4	25	ND	-	-	-	+	-	-	-	-	+	-	+	-	-	-	+	+	+	-	-	-	-	-	-	-	+	+	-	-	-	-	-
JARB-D96P0243	PRJDB15501	SAMD00591580	DRR456987	1996-05-23	male	71	blood	SC1	5	1	4	1	4	12	1	10	5	t548	-	-	-	-	-	-	-	-	+	-	+	-	-	-	+	+	+	-	-	-	-	-	-	-	-	+	-	-	-	-	-
JARB-D96P0266	PRJDB15501	SAMD00591581	DRR456988	1996-09-19	male	72	blood	SC8	45	10	14	8	6	10	3	2	45	t065	-	-	-	-	-	-	-	-	+	-	+	-	-	-	+	+	+	-	-	-	-	-	-	-	+	+	-	-	-	-	-
JARB-D96P0298	PRJDB15501	SAMD00591582	DRR456989	1996-01-26		0	blood	SC6	12	1	3	1	8	11	5	11	12	t3326	-	-	-	-	-	-	-	-	-	-	-	-	-	-	-	-	-	+	-	-	-	-	-	-	-	+	-	+	-	-	-
JARB-D96P0302	PRJDB15501	SAMD00591583	DRR456990	1996-02-16		0	blood	SC2	8	3	3	1	1	4	4	3	8	t036	-	-	-	-	-	-	-	-	-	-	-	-	-	-	-	-	-	-	-	-	-	-	-	-	-	+	-	-	-	-	-
JARB-D96P0390	PRJDB15501	SAMD00591584	DRR456991	1996-09-16	male	75	blood	SC1	5	1	4	1	4	12	1	10	5	t002	IIa	-	-	+	+	-	-	+	+	-	+	-	-	+	+	+	+	+	-	-	-	-	-	-	-	+	-	-	-	-	-
JARB-D96P0448	PRJDB15501	SAMD00591585	DRR456992	1996-06-26	female	71	blood	SC1	5	1	4	1	4	12	1	10	5	t002	IIa	-	-	-	+	-	-	+	+	-	+	-	-	+	+	+	+	-	-	-	-	-	-	-	-	+	-	-	-	-	-
JARB-D96P0493	PRJDB15501	SAMD00591586	DRR456993	1996-07-19	female	73	blood	SC1	5	1	4	1	4	12	1	10	5	t1080	IIa	-	-	-	+	-	-	+	+	-	+	-	-	+	+	+	+	+	-	-	-	-	-	-	-	+	-	-	-	-	-
JARB-D96P0566	PRJDB15501	SAMD00591587	DRR456994	1996-06-18	female	19	blood	SC1	5	1	4	1	4	12	1	10	5	t062	IIa	-	-	-	+	-	-	+	+	-	+	-	-	+	+	+	+	-	-	-	-	-	-	-	-	+	-	-	-	-	-
JARB-D96P0567	PRJDB15501	SAMD00591588	DRR456995	1996-06-18	male	79	blood	SC1	5	1	4	1	4	12	1	10	5	t002	IIa	-	-	-	+	-	-	+	+	-	+	-	-	+	+	+	+	+	-	-	-	-	-	-	-	+	-	-	-	-	-
JARB-D96P0568	PRJDB15501	SAMD00591589	DRR456996	1996-06-26	female	66	blood	SC1	5	1	4	1	4	12	1	10	5	t062	IIa	-	-	-	+	-	-	+	+	-	+	-	-	+	+	+	+	-	-	-	-	-	-	-	-	+	-	-	-	-	-
JARB-D96P0569	PRJDB15501	SAMD00591590	DRR456997	1996-06-14	male	64	blood	SC1	5	1	4	1	4	12	1	10	5	t002	IIa	-	-	-	+	-	-	+	+	-	+	-	-	+	+	+	+	+	-	-	-	-	-	-	-	+	-	-	-	-	-
JARB-D96P0570	PRJDB15501	SAMD00591591	DRR456998	1996-05-21	male	53	blood	SC1	5	1	4	1	4	12	1	10	5	t002	IIa	-	-	-	+	-	-	+	+	-	+	-	-	+	+	+	+	+	-	-	-	-	-	-	-	+	-	-	-	-	-
JARB-D96P0571	PRJDB15501	SAMD00591592	DRR456999	1996-05-22	male	58	blood	SC3	188	3	1	1	8	1	1	1	188	t189	-	-	-	-	-	-	-	-	-	-	-	-	-	-	-	-	-	-	-	-	-	-	-	-	-	+	-	-	-	-	-
JARB-D96P0572	PRJDB15501	SAMD00591593	DRR457000	1996-07-06	male	34	blood	SC1	5	1	4	1	4	12	1	10	5	t062	IIa	-	-	-	+	-	-	+	+	-	+	-	-	+	+	+	+	-	-	-	-	-	-	-	-	+	-	-	-	-	-
JARB-D96P0573	PRJDB15501	SAMD00591594	DRR457001	1996-07-09	male	51	blood	SC1	5	1	4	1	4	12	1	10	5	t002	IIa	-	-	-	+	-	-	+	+	-	+	-	-	+	+	+	+	+	-	-	-	-	-	-	-	+	-	-	-	-	-
JARB-D96P0574	PRJDB15501	SAMD00591595	DRR457002	1996-08-04	male	64	blood	SC1	5	1	4	1	4	12	1	10	5	t002	IIa	-	-	-	+	-	-	+	+	-	+	-	-	+	+	+	+	-	-	-	-	-	-	-	-	+	-	-	-	-	-
JARB-D96P0575	PRJDB15501	SAMD00591596	DRR457003	1996-08-06	female	63	blood	SC1	5	1	4	1	4	12	1	10	5	t002	IIa	-	+	+	+	-	-	+	+	-	+	-	-	+	+	+	+	-	+	-	-	-	-	-	-	+	-	-	-	-	-
JARB-D96P0615	PRJDB15501	SAMD00591597	DRR457004	1996-09-03	female	42	blood	SC1	5	1	4	1	4	12	1	10	5	t002	IIa	-	-	-	+	-	-	+	+	-	+	-	-	+	+	+	+	-	-	-	-	-	-	-	-	+	-	-	-	-	-
JARB-D96P0626	PRJDB15501	SAMD00591598	DRR457005	1996-10-15	male	84	blood	SC1	512	1	102	1	4	12	1	10	5	t002	IIa	-	-	-	+	-	-	+	+	-	+	-	-	+	+	+	+	-	-	-	-	-	-	-	-	+	-	-	-	-	-
JARB-D96P0627	PRJDB15501	SAMD00591599	DRR457006	1996-10-15	female	69	blood	SC1	5	1	4	1	4	12	1	10	5	t071	IIa	-	-	-	+	-	-	+	+	-	+	-	-	+	+	+	+	-	-	-	-	-	-	-	-	+	-	-	-	-	-
JARB-D96P0679	PRJDB15501	SAMD00591600	DRR457007	1996-06-03	female	63	blood	SC1	5	1	4	1	4	12	1	10	5	t109	I	-	+	+	-	-	-	-	+	-	+	-	+	-	+	-	+	-	+	-	-	-	-	-	-	+	-	-	-	-	-
JARB-D98P0007	PRJDB15501	SAMD00591601	DRR457008	1998-12-04	male	57	blood	SC4	96	12	1	1	15	11	1	40	96	ND	-	-	+	-	-	-	-	-	-	-	-	-	-	-	-	-	-	-	-	-	-	-	-	-	-	+	-	-	-	-	-
JARB-D98P0143	PRJDB15501	SAMD00591602	DRR457009	1998-11-10	male	38	blood	SC1	-	3	~482	1	15	100	1	10	5	ND	-	-	-	-	-	-	-	-	-	-	-	-	-	-	-	-	-	-	-	-	-	-	-	-	-	+	-	-	-	-	-
JARB-D98P0153	PRJDB15501	SAMD00591603	DRR457010	1998-06-10	male		blood	SC1	5	1	4	1	4	12	1	10	5	t1062	-	-	+	-	-	-	-	-	+	-	+	-	-	-	+	+	+	-	-	-	-	-	-	-	-	+	-	-	-	-	-
JARB-D98P0155	PRJDB15501	SAMD00591604	DRR457011	1998-06-22	male		blood	SC4	2700	4	1	1	14	1	1	1	1	t1775	-	-	-	+	-	-	-	-	-	-	-	-	-	-	-	-	-	-	-	-	-	-	-	-	-	+	-	-	-	-	-
JARB-D98P0158	PRJDB15501	SAMD00591605	DRR457012	1998-06-14	male		blood	SC1	5	1	4	1	4	12	1	10	5	t1345	-	-	-	-	-	+	-	-	+	-	+	+	-	-	+	+	+	+	-	+	-	-	-	-	-	+	-	-	-	-	-
JARB-D98P0161	PRJDB15501	SAMD00591606	DRR457013, DRR457496	1998-06-19	male		blood	SC4	1	1	1	1	1	1	1	1	1	t127	-	-	-	-	-	-	-	-	-	+	-	-	-	-	-	-	-	-	-	-	-	-	-	-	-	+	-	-	-	-	-
JARB-D98P0162	PRJDB15501	SAMD00591607	DRR457014	1998-03-13	female	52	blood	SC1	5	1	4	1	4	12	1	10	5	t179	-	-	-	-	-	-	-	-	+	-	+	-	-	-	+	+	+	+	-	-	-	-	-	-	-	+	-	-	-	-	-
JARB-D98P0167	PRJDB15501	SAMD00591608	DRR457015	1998-06-01	male	78	blood	SC4	20	4	9	1	8	1	10	8	20	t164	-	-	-	-	-	-	-	-	+	-	+	-	-	-	+	+	+	-	-	-	-	-	-	-	-	+	+	-	-	-	-
JARB-D98P0170	PRJDB15501	SAMD00591609	DRR457016	1998-05-19	female	73	blood	SC6	12	1	3	1	8	11	5	11	12	t160	-	-	-	-	-	-	-	-	-	-	-	-	-	-	-	-	-	+	-	-	-	-	-	-	-	+	-	+	-	-	-
JARB-D98P0184	PRJDB15501	SAMD00591610	DRR457017	1998-01-05			blood	SC8	508	10	40	8	6	10	3	2	508	t630	-	-	-	-	-	-	-	-	+	-	+	-	-	-	+	+	+	-	-	-	-	-	-	-	+	+	-	-	-	-	-
JARB-D98P0348	PRJDB15501	SAMD00591611	DRR457018	1998-12-07	male	60	blood	SC5	573	1	1	1	1	12	1	1	1	t1579	-	-	-	-	+	-	-	-	+	-	+	-	-	+	+	+	+	-	-	-	-	-	-	-	+	+	-	+	-	-	-
JARB-D98P0351	PRJDB15501	SAMD00591612	DRR457019	1998-01-01			blood	SC5	15	13	13	1	1	12	11	13	15	t491	-	-	-	-	-	-	-	-	-	-	-	+	-	-	-	-	-	-	-	+	-	-	-	-	-	+	-	-	-	-	-
JARB-D98P0436	PRJDB15501	SAMD00591613	DRR457020	1998-11-27	male	39	blood	SC1	5	1	4	1	4	12	1	10	5	t686	IIa	-	-	-	+	-	-	+	+	-	+	-	-	+	+	+	+	-	-	-	-	-	-	-	-	+	-	-	-	-	-
JARB-D98P0480	PRJDB15501	SAMD00591614	DRR457021	1998-01-01			blood	SC1	5	1	4	1	4	12	1	10	5	t002	IIa	-	-	-	+	-	-	+	+	-	+	-	-	+	+	+	+	-	-	-	-	-	-	-	-	+	-	-	-	-	-
JARB-D98P0485	PRJDB15501	SAMD00591615	DRR457022	1998-01-01			blood	SC1	-	1	864?	1	4	12	1	10	5	t002	IIa	-	-	+	+	-	-	+	-	-	-	-	-	+	-	-	+	-	-	-	-	-	-	+	-	+	-	-	-	-	-
JARB-D98P0491	PRJDB15501	SAMD00591616	DRR457023	1998-01-01			blood	SC1	5	1	4	1	4	12	1	10	5	t010	IIa	-	+	-	+	-	-	+	+	-	+	-	-	+	+	+	+	-	-	-	-	-	-	-	-	+	-	-	-	-	-
JARB-D98P0537	PRJDB15501	SAMD00591617	DRR457024	1998-05-18	male		blood	SC1	5	1	4	1	4	12	1	10	5	t002	IIa	-	-	-	+	-	-	+	+	-	+	-	-	+	+	+	+	-	-	-	-	-	-	-	-	+	-	-	-	-	-
JARB-D98P0538	PRJDB15501	SAMD00591618	DRR457025, DRR457497	1998-01-01			blood	SC1	5	1	4	1	4	12	1	10	5	t002	IIa	-	-	+	+	-	-	+	+	-	+	-	-	+	+	+	+	-	-	-	-	-	-	-	-	+	-	-	-	-	-
JARB-D98P0539	PRJDB15501	SAMD00591619	DRR457026	1998-01-01			blood	SC1	-	1	4	1	4	206	1	10	5	t002	IIa	-	-	-	+	-	-	+	+	-	-	-	-	+	+	+	-	-	-	-	-	-	-	-	-	+	-	-	-	-	-
JARB-D98P0540	PRJDB15501	SAMD00591620	DRR457027	1998-06-15	male		blood	SC1	5	1	4	1	4	12	1	10	5	t002	IIa	-	-	+	+	-	-	+	+	-	+	-	-	+	+	+	+	-	-	-	-	-	-	-	-	+	-	-	-	-	-
JARB-D98P0541	PRJDB15501	SAMD00591621	DRR457028	1998-01-01			blood	SC1	5	1	4	1	4	12	1	10	5	t002	IIa	-	-	-	+	-	-	+	+	-	+	-	-	+	+	+	+	-	-	-	-	-	-	-	-	+	-	-	-	-	-
JARB-D98P0542	PRJDB15501	SAMD00591622	DRR457029	1998-07-18	female		blood	SC1	5	1	4	1	4	12	1	10	5	t002	IIa	-	-	-	+	-	-	+	+	-	+	-	-	+	+	+	+	+	-	-	-	-	-	-	-	+	-	-	-	-	-
JARB-D98P0543	PRJDB15501	SAMD00591623	DRR457030	1998-07-06	male		blood	SC1	5	1	4	1	4	12	1	10	5	t002	IIa	-	-	-	+	-	-	+	+	-	+	-	-	+	+	+	+	+	-	-	-	-	-	-	-	+	-	-	-	-	-
JARB-D98P0544	PRJDB15501	SAMD00591624	DRR457031	1998-07-05	male		blood	SC1	5	1	4	1	4	12	1	10	5	t002	IIa	-	-	+	+	-	-	+	+	-	+	-	-	+	+	+	+	-	-	-	-	-	-	-	-	+	-	-	-	-	-
JARB-D98P0545	PRJDB15501	SAMD00591625	DRR457032	1998-05-09	male		blood	SC1	5	1	4	1	4	12	1	10	5	ND	IIa	-	-	-	+	-	-	+	+	-	+	-	-	+	+	+	+	+	-	-	-	-	-	-	-	+	-	-	-	-	-
JARB-D98P0546	PRJDB15501	SAMD00591626	DRR457033	1998-11-10	female	77	blood	SC1	5	1	4	1	4	12	1	10	5	t002	IIa	-	-	-	+	-	-	+	+	-	+	-	-	+	+	+	+	+	-	-	-	-	-	-	-	+	-	-	-	-	-
JARB-D98P0548	PRJDB15501	SAMD00591627	DRR457034	1998-07-31	male	76	blood	SC1	5	1	4	1	4	12	1	10	5	t002	IIa	-	-	-	+	-	-	+	+	-	+	-	-	+	+	+	+	+	-	-	-	-	-	-	-	+	-	-	-	-	-
JARB-D98P0551	PRJDB15501	SAMD00591628	DRR457035	1998-12-01	male	66	blood	SC1	5	1	4	1	4	12	1	10	5	t002	IIa	-	-	-	+	-	-	+	+	-	+	-	-	+	+	-	+	-	-	-	-	-	-	-	-	+	-	-	-	-	-
JARB-D98P0552	PRJDB15501	SAMD00591629	DRR457036	1998-11-26	male	76	blood	SC1	5	1	4	1	4	12	1	10	5	t002	IIa	-	-	-	+	-	-	+	-	-	-	-	-	+	-	-	-	+	-	-	-	-	-	-	-	+	-	-	-	-	-
JARB-D98P0554	PRJDB15501	SAMD00591630	DRR457037	1998-06-30	male	32	blood	SC1	5	1	4	1	4	12	1	10	5	t002	IIa	-	-	-	+	-	-	+	+	-	+	-	-	+	+	+	-	+	-	-	-	-	-	-	-	+	-	-	-	-	-
JARB-D98P0556	PRJDB15501	SAMD00591631	DRR457038	1998-10-01	female	45	blood	SC1	5	1	4	1	4	12	1	10	5	t002	IIa	-	-	-	+	-	-	+	+	-	+	-	-	+	+	-	+	+	-	-	-	-	-	-	-	+	-	-	-	-	-
JARB-D98P0557	PRJDB15501	SAMD00591632	DRR457039	1998-09-04	male	67	blood	SC1	5	1	4	1	4	12	1	10	5	t002	IIa	-	-	-	+	-	-	+	+	-	+	-	-	+	+	-	-	-	-	-	-	-	-	-	-	+	-	-	-	-	-
JARB-D98P0558	PRJDB15501	SAMD00591633	DRR457040	1998-08-05	male	62	blood	SC1	5	1	4	1	4	12	1	10	5	t002	IIa	-	-	+	-	-	-	-	+	-	+	-	-	-	+	+	+	+	-	-	-	-	-	-	-	+	-	-	-	-	-
JARB-D98P0559	PRJDB15501	SAMD00591634	DRR457041	1998-05-13	female		blood	SC1	5	1	4	1	4	12	1	10	5	t002	IIa	-	-	-	+	-	-	+	+	-	+	-	-	+	+	+	+	+	-	-	-	-	-	-	-	+	-	-	-	-	-
JARB-D98P0560	PRJDB15501	SAMD00591635	DRR457042	1998-08-21	male	49	blood	SC1	5	1	4	1	4	12	1	10	5	t548	IIa	-	-	-	+	-	-	+	+	-	+	-	-	+	+	+	+	-	-	-	-	-	-	-	-	+	-	-	-	-	-
JARB-D98P0561	PRJDB15501	SAMD00591636	DRR457043	1998-11-30	male	54	blood	SC1	5	1	4	1	4	12	1	10	5	t002	IIa	-	-	+	+	-	-	+	+	-	+	-	-	+	+	+	+	-	-	-	-	-	-	-	-	+	-	-	-	-	-
JARB-D98P0594	PRJDB15501	SAMD00591637	DRR457044	1998-07-08	male	17	blood	SC1	5	1	4	1	4	12	1	10	5	t002	IIa	-	-	-	+	-	-	+	+	-	+	-	-	+	+	+	+	-	-	-	-	-	-	-	-	+	-	-	-	-	-
JARB-D98P0595	PRJDB15501	SAMD00591638	DRR457045	1998-07-07	male	60	blood	SC1	5	1	4	1	4	12	1	10	5	t002	IIa	-	-	-	+	-	-	+	+	-	+	-	-	+	+	+	+	-	-	-	-	-	-	-	-	+	-	-	-	-	-
JARB-D98P0598	PRJDB15501	SAMD00591639	DRR457046	1998-04-16	male	56	blood	SC1	5	1	4	1	4	12	1	10	5	t002	IIa	-	-	-	+	-	-	+	+	-	+	-	-	+	+	+	+	+	-	-	-	-	-	-	-	+	-	-	-	-	-
JARB-D98P0605	PRJDB15501	SAMD00591640	DRR457047	1998-03-23	male	61	blood	SC2	8	3	3	1	1	4	4	3	8	t1767	I	-	-	-	-	-	-	-	-	-	-	+	-	-	-	-	-	+	-	+	-	-	-	-	-	+	-	-	-	-	-
JARB-D98P0622	PRJDB15501	SAMD00591641	DRR457048	1998-12-25	male	41	blood	SC1	512	1	102	1	4	12	1	10	5	t002	IIa	-	+	-	+	-	-	+	+	-	+	-	-	+	+	+	+	-	-	-	-	-	-	-	-	+	-	-	-	-	-
JARB-D98P0665	PRJDB15501	SAMD00591642	DRR457049	1998-12-03	male	79	blood	SC1	5	1	4	1	4	12	1	10	5	t002	IIa	-	-	-	+	-	-	+	+	-	+	-	-	+	+	+	+	-	-	-	-	-	-	-	-	+	-	-	-	-	-
JARB-D98P0668	PRJDB15501	SAMD00591643	DRR457050	1998-11-27	male	19	blood	SC1	-	1	~4	1	4	12	1	56	5	t509	IIa	-	-	-	+	-	-	+	+	-	+	-	-	+	+	+	+	-	-	-	-	-	-	-	-	+	-	-	-	-	-
JARB-D98P0699	PRJDB15501	SAMD00591644	DRR457051	1998-11-16	female	77	blood	SC1	5	1	4	1	4	12	1	10	5	t002	IIa	-	-	-	+	-	-	+	+	-	+	-	-	+	+	+	+	-	-	-	-	-	-	-	-	+	-	-	-	-	-
JARB-D98P0706	PRJDB15501	SAMD00591645	DRR457052	1998-12-01	male	78	blood	SC1	5	1	4	1	4	12	1	10	5	t002	IIa	-	-	+	+	-	-	+	+	-	+	-	-	+	+	+	+	-	-	-	-	-	-	-	-	+	-	-	-	-	-
JARB-D98P0739	PRJDB15501	SAMD00591646	DRR457053	1998-11-05	male	57	blood	SC1	-	1	4	1	~4	12	1	10	5	t463	IIa	-	-	-	+	-	-	+	+	-	+	-	-	+	+	+	+	-	-	-	-	-	-	-	-	+	-	-	-	-	-
JARB-D98P0747	PRJDB15501	SAMD00591647	DRR457054	1998-10-20	male	55	blood	SC1	5	1	4	1	4	12	1	10	5	t002	IIa	-	-	-	+	-	-	+	+	-	+	-	-	+	+	+	+	-	-	-	-	-	-	-	-	+	-	-	-	-	-
JARB-D98P0755	PRJDB15501	SAMD00591648	DRR457055	1998-10-26	male	77	blood	SC1	5	1	4	1	4	12	1	10	5	t002	IIa	-	-	-	+	-	-	+	+	-	+	-	-	+	+	+	+	+	-	-	-	-	-	-	-	+	-	-	-	-	-
JARB-D98P0760	PRJDB15501	SAMD00591649	DRR457056	1998-11-17	male	75	blood	SC1	5	1	4	1	4	12	1	10	5	t002	IIa	-	-	-	+	-	-	+	+	-	+	-	-	+	+	+	+	-	-	-	-	-	-	-	-	+	-	-	-	-	-
[truncated: 71 more columns]

## Sheet: Supplementary Table 3
Supplementary Table 3. Comparison of quinolone resistance QRDR mutation of S.aureus isolates in two period.
Group	grlA					gryA
	number of strains (%)					number of strains (%)
	S80F	S80Y	E84G	E84K		S84A	S84L	S85P	E88G	E88K
1994-2000 period
Total (n=183);	62 (33.9)	32 (17.5)	1 (0.6)	22 (12)		1 (0.6)	65 (35.3)	10 (5.5)	9 (4.9)	27 (14.8)
MRSA (n=104)	59 (56.7)	32 (30.8)	1 (1)	22 (21.2)		1 (1)	64 (61.5)	10 (9.6)	9 (8.7)	27 (26)
MSSA (n=79)	3 (3.8)	0 (0)	0 (0)	0 (0)		0 (0)	1 (1.3)	0 (0)	0 (0)	0 (0)
CC8 (n=13)	2 (16.7)	1 (8.3)	1 (8.3)	0 (0)		0 (0)	3 (25)	0 (0)	0 (0)	0 (0)
ST8 (n=9)	2 (22.2)	1 (11.1)	1 (11.1)	0 (0)		0 (0)	3 (33.3)	0 (0)	0 (0)	0 (0)
ST8-MRSA (n=3)	2 (66.7)	1 (33.3)	1 (33.3)	0 (0)		0 (0)	3 (100)	0 (0)	0 (0)	0 (0)
ST8-MSSA (n=6)	0 (0)	0 (0)	0 (0)	0 (0)		0 (0)	0 (0)	0 (0)	0 (0)	0 (0)
ST8-I (n=2)	2 (100)	0 (0)	0 (0)	0 (0)		0 (0)	2 (100)	0 (0)	0 (0)	0 (0)
ST8-IV (n=1)	0 (0)	1 (100)	1 (100)	0 (0)		0 (0)	1 (100)	0 (0)	0 (0)	0 (0)
CC5 (n=111)	57 (51.4)	32 (28.8)	1 (0.9)	22 (19.8)		1 (0.9)	62 (55.9)	10 (9)	9 (8.1)	27 (24.3)
ST5-MRSA (n=88)	52 (59.1)	25 (28.4)	0 (0)	18 (20.5)		1 (1.1)	53 (60.2)	9 (10.2)	8 (9.1)	25 (28.4)
ST5-MSSA (n=9)	0 (0)	0 (0)	0 (0)	0 (0)		0 (0)	0 (0)	0 (0)	0 (0)	0 (0)
ST5-I (n=3)	3 (100)	0 (0)	0 (0)	0 (0)		0 (0)	3 (100)	0 (0)	0 (0)	0 (0)
ST5-II (n=84)	49 (58.3)	25 (29.8)	0 (0)	18 (21.4)		1 (1.2)	50 (59.5)	9 (10.7)	8 (9.5)	25 (29.8)
CC1 (n=4)	0 (0)	0 (0)	0 (0)	0 (0)		0 (0)	0 (0)	0 (0)	0 (0)	0 (0)
CC12 (n=12)	0 (0)	0 (0)	0 (0)	0 (0)		0 (0)	0 (0)	0 (0)	0 (0)	0 (0)
CC15 (n=10)	1 (10)	0 (0)	0 (0)	0 (0)		0 (0)	1 (10)	0 (0)	0 (0)	0 (0)
CC20 (n=20)	0 (0)	0 (0)	0 (0)	0 (0)		0 (0)	0 (0)	0 (0)	0 (0)	0 (0)
CC25 (n=2)	0 (0)	0 (0)	0 (0)	0 (0)		0 (0)	0 (0)	0 (0)	0 (0)	0 (0)
CC30 (n=3)	0 (0)	0 (0)	0 (0)	0 (0)		0 (0)	0 (0)	0 (0)	0 (0)	0 (0)
CC45 (n=3)	1 (33.3)	0 (0)	0 (0)	0 (0)		0 (0)	0 (0)	0 (0)	0 (0)	0 (0)
CC81 (n=3)	0 (0)	0 (0)	0 (0)	0 (0)		0 (0)	0 (0)	0 (0)	0 (0)	0 (0)
CC188 (n=10)	1 (10)	0 (0)	0 (0)	0 (0)		0 (0)	0 (0)	0 (0)	0 (0)	0 (0)
CC508 (n=3)	0 (0)	0 (0)	0 (0)	0 (0)		0 (0)	0 (0)	0 (0)	0 (0)	0 (0)
2019-2020 period
Total (n=580);	250 (43.1)	47 (8.1)	134 (23.1)	46 (7.9)		1 (0.2)	271 (46.7)	16 (2.8)	29 (5)	10 (1.7)
MRSA (n=269)	204 (75.8)	36 (13.4)	129 (48)	44 (16.4)		0 (0)	234 (87)	16 (6)	26 (9.7)	9 (3.4)
MSSA (n=311)	46 (14.8)	11 (3.5)	5 (1.6)	2 (0.6)		1 (0.3)	37 (11.9)	0 (0)	3 (1)	1 (0.3)
CC8 (n=127);	70 (55.1)	10 (7.9)	0 (0)	11 (8.7)		0 (0)	69 (54.3)	8 (6.3)	2 (1.6)	0 (0)
ST8 (n=107)	62 (57.9)	8 (7.5)	0 (0)	9 (8.4)		0 (0)	61 (57)	7 (6.5)	2 (1.9)	0 (0)
ST8-MRSA (n=70)	50 (71.4)	6 (8.6)	0 (0)	9 (12.9)		0 (0)	54 (77.1)	7 (10)	1 (1.4)	0 (0)
ST8-MSSA (n=37)	12 (32.4)	2 (5.4)	0 (0)	0 (0)		0 (0)	7 (18.9)	0 (0)	1 (2.7)	0 (0)
ST8-I (n=10)	10 (100)	0 (0)	0 (0)	9 (90)		0 (0)	10 (100)	7 (70)	0 (0)	0 (0)
ST8-IV (n=58)	38 (65.5)	6 (10.3)	0 (0)	0 (0)		0 (0)	43 (74.1)	0 (0)	0 (0)	0 (0)
ST8-IVj (n=24)	24 (100)	0 (0)	0 (0)	0 (0)		0 (0)	24 (100)	0 (0)	0 (0)	0 (0)
ST8-IVa (n=8)	2 (25)	6 (75)	0 (0)	0 (0)		0 (0)	8 (100)	0 (0)	0 (0)	0 (0)
ST8-IVl (n=20)	7 (35)	0 (0)	0 (0)	0 (0)		0 (0)	6 (30)	0 (0)	0 (0)	0 (0)
CC1 (n=145);	137 (94.5)	0 (0)	134 (92.4)	1 (0.7)		0 (0)	137 (94.5)	2 (1.4)	0 (0)	3 (2.1)
ST1 (n=104)	96 (92.3)	0 (0)	94 (90.4)	1 (1)		0 (0)	96 (92.3)	2 (1.9)	0 (0)	3 (2.9)
ST1-MRSA-IV (n=93)	93 (100)	0 (0)	92 (98.9)	1 (1.1)		0 (0)	93 (100)	2 (2.2)	0 (0)	3 (3.2)
ST1-MSSA (n=11)	3 (27.3)	0 (0)	2 (18.2)	0 (0)		0 (0)	3 (27.3)	0 (0)	0 (0)	0 (0)
ST1-t127 (n=7)	1 (5)	0 (0)	0 (0)	0 (0)		0 (0)	1 (5)	0 (0)	0 (0)	0 (0)
ST2725-IV (n=28)	28 (100)	0 (0)	28 (100)	0 (0)		0 (0)	28 (100)	0 (0)	0 (0)	0 (0)
CC5 (n=73);	15 (20.5)	30 (41.1)	0 (0)	32 (43.8)		0 (0)	41 (56.2)	6 (8.2)	25 (34.2)	7 (9.6)
ST5 (n=42)	12 (28.6)	3 (7.1)	0 (0)	4 (9.5)		0 (0)	13 (31)	5 (11.9)	0 (0)	2 (4.8)
ST5-MRSA (n=25)	9 (36)	3 (12)	0 (0)	4 (16)		0 (0)	11 (44)	5 (20)	0 (0)	1 (4)
ST5-MSSA (n=17)	3 (17.6)	0 (0)	0 (0)	0 (0)		0 (0)	2 (11.8)	0 (0)	0 (0)	1 (5.9)
ST5-II (n=11)	8 (72.7)	3 (27.3)	0 (0)	4 (36.4)		0 (0)	10 (90.9)	4 (36.4)	0 (0)	1 (9.1)
ST764-II (n=25)	1 (4)	24 (96)	0 (0)	25 (100)		0 (0)	25 (100)	1 (4)	25 (100)	0 (0)
CC81 (n=10);	4 (40)	0 (0)	0 (0)	0 (0)		0 (0)	4 (40)	0 (0)	0 (0)	0 (0)
ST81-MRSA-IVg (n=4)	4 (100)	0 (0)	0 (0)	0 (0)		0 (0)	4 (100)	0 (0)	0 (0)	0 (0)
ST81-MSSA (n=6)	0 (0)	0 (0)	0 (0)	0 (0)		0 (0)	0 (0)	0 (0)	0 (0)	0 (0)
CC12 (n=12)	0 (0)	0 (0)	0 (0)	0 (0)		0 (0)	0 (0)	0 (0)	0 (0)	0 (0)
CC15 (n=33)	5 (15.2)	0 (0)	0 (0)	1 (3)		1 (3)	2 (6.1)	0 (0)	0 (0)	0 (0)
CC20 (n=10)	2 (20)	0 (0)	0 (0)	0 (0)		0 (0)	2 (20)	0 (0)	0 (0)	0 (0)
CC30 (n=30)	0 (0)	0 (0)	0 (0)	0 (0)		0 (0)	0 (0)	0 (0)	0 (0)	0 (0)
CC45 (n=17)	9 (52.9)	0 (0)	0 (0)	1 (5.9)		0 (0)	6 (35.3)	0 (0)	0 (0)	0 (0)
CC97 (n=24)	0 (0)	1 (4.2)	0 (0)	0 (0)		0 (0)	1 (4.2)	0 (0)	0 (0)	0 (0)
CC121 (n=10)	0 (0)	0 (0)	0 (0)	0 (0)		0 (0)	0 (0)	0 (0)	0 (0)	0 (0)
CC188 (n=42)	1 (2.4)	6 (14.3)	0 (0)	0 (0)		0 (0)	6 (14.3)	0 (0)	0 (0)	0 (0)
CC398 (n=11)	0 (0)	0 (0)	0 (0)	0 (0)		0 (0)	0 (0)	0 (0)	0 (0)	0 (0)
CC508 (n=13)	3 (23.1)	0 (0)	0 (0)	0 (0)		0 (0)	0 (0)	0 (0)	2 (15.4)	0 (0)

## Sheet: Supplementary Table 4
Supplementary Table 4. Metadata of NCBI public dataset of S. aureus used for comparative analysis.
ID	BioProject accession#	BioSample accession#	Country	isolated_date	CC	ST
1LL	PRJDB6918	SAMD00115773	Japan	-	CC8	ST8
1LS	PRJDB6918	SAMD00115772	Japan	-	CC8	ST8
1SL	PRJDB6918	SAMD00115771	Japan	-	CC8	ST8
1SS	PRJDB6918	SAMD00115770	Japan	-	CC8	ST8
3S	PRJDB6918	SAMD00115769	Japan	-	CC8	ST8
HU09-1126019	PRJNA357982	SAMN06479993	Japan: Hiroshima	2009-11-26	CC8	ST8
HU09-1208078	PRJNA357982	SAMN06480001	Japan: Hiroshima	2009-12-08	CC8	ST8
HU13-0111047	PRJNA357982	SAMN06480012	Japan: Hiroshima	2013-01-11	CC8	ST8
HU13-0408003	PRJNA357982	SAMN06480025	Japan: Hiroshima	2013-04-07	CC8	ST8
HU13-0423010	PRJNA357982	SAMN06480029	Japan: Hiroshima	2013-04-23	CC8	ST8
HU13-0502070	PRJNA357982	SAMN06480031	Japan: Hiroshima	2013-05-02	CC8	ST8
HU13-0507040	PRJNA357982	SAMN06480034	Japan: Hiroshima	2013-05-07	CC8	ST8
HU13-0507080	PRJNA357982	SAMN06480035	Japan: Hiroshima	2013-05-07	CC8	ST8
HU13-0528019	PRJNA357982	SAMN06480040	Japan: Hiroshima	2013-05-28	CC8	ST8
HU13-0603043	PRJNA357982	SAMN06480041	Japan: Hiroshima	2013-06-01	CC8	ST8
HU13-1202071	PRJNA357982	SAMN06480059	Japan: Hiroshima	2013-12-02	CC8	ST8
JARB-OU0088	PRJDB15501	SAMD00591702	Japan	1985	CC8	ST8
JARB-OU0159	PRJDB15501	SAMD00591773	Japan	1993	CC8	ST8
JARB-OU0201	PRJDB15501	SAMD00591815	Japan	1997	CC5	ST2809
JARB-OU0337	PRJDB15501	SAMD00591948	Japan	2006-02-21	CC8	ST8
JARB-OU0403	PRJDB15501	SAMD00592014	Japan	2008-04-23	CC8	ST8
JARB-OU0428	PRJDB15501	SAMD00592039	Japan	2009-02-24	CC8	ST8
JARB-OU0444	PRJDB15501	SAMD00592055	Japan	2009-12-12	CC8	ST8
JMUB1250	PRJDB9008	SAMD00199099	Japan	2011/6	CC8	ST8
JMUB1279	PRJDB9008	SAMD00199100	Japan	-	CC8	ST8
JMUB1358	PRJDB9008	SAMD00199101	Japan	-	CC5	ST764
JMUB3031	PRJDB7266	SAMD00134209	Japan	2017	CC1	ST1
JMUB473	PRJDB9008	SAMD00199095	Japan	2014-08-27	CC5	ST764
JMUB475	PRJDB9008	SAMD00199096	Japan	2014-08-15	CC5	ST764
JMUB480	PRJDB9008	SAMD00199091	Japan	2013-10-30	CC5	ST764
JMUB483	PRJDB9008	SAMD00199092	Japan	-	CC5	ST764
JMUB486	PRJDB9008	SAMD00199093	Japan	2014-01-24	CC5	ST764
JMUB491	PRJDB9008	SAMD00199094	Japan	2014-05-02	CC1	ST1
JMUB611	PRJDB9008	SAMD00199098	Japan	-	CC5	ST5
JRA307	PRJDB8385	SAMD00172962	Japan:Ibaraki	2018-01-20	CC1	ST1
K18-4-137	PRJDB10125	SAMD00233584	Japan:Niigata	2018	CC1	ST2725
K18-4-141	PRJDB10125	SAMD00233563	Japan:Niigata	2018	CC1	ST2725
K18-4-157	PRJDB10125	SAMD00233592	Japan:Niigata	2018	CC1	ST2725
K18-4-16	PRJDB10125	SAMD00233593	Japan:Niigata	2018	CC1	ST2725
K18-4-166	PRJDB10125	SAMD00233550	Japan:Niigata	2018	CC1	ST2725
K18-4-18	PRJDB10125	SAMD00233530	Japan:Niigata	2018	CC5	ST764
K18-4-186	PRJDB10125	SAMD00233594	Japan:Niigata	2018	CC1	ST2725
K18-4-19	PRJDB10125	SAMD00233595	Japan:Niigata	2018	CC1	ST2725
K18-4-195	PRJDB10125	SAMD00233596	Japan:Niigata	2018	CC1	ST1
K18-4-22	PRJDB10125	SAMD00233585	Japan:Niigata	2018	CC1	ST2725
K18-4-223	PRJDB10125	SAMD00233503	Japan:Niigata	2018	CC1	ST2725
K18-4-232	PRJDB10125	SAMD00233598	Japan:Niigata	2018	CC1	ST2725
K18-4-239	PRJDB10125	SAMD00233531	Japan:Niigata	2018	CC5	ST764
K18-4-29	PRJDB10125	SAMD00233535	Japan:Niigata	2018	CC1	ST2725
K18-4-297	PRJDB10125	SAMD00233587	Japan:Niigata	2018	CC1	ST2725
K18-4-310	PRJDB10125	SAMD00233588	Japan:Niigata	2018	CC1	ST2725
K18-4-315	PRJDB10125	SAMD00233586	Japan:Niigata	2018	CC1	ST2725
K18-4-412	PRJDB10125	SAMD00233536	Japan:Niigata	2018	CC1	ST2725
K18-4-413	PRJDB10125	SAMD00233571	Japan:Niigata	2018	CC1	ST2725
K18-4-414	PRJDB10125	SAMD00233572	Japan:Niigata	2018	CC1	ST2725
K18-4-459	PRJDB10125	SAMD00233580	Japan:Niigata	2018	CC1	ST2725
K18-4-539	PRJDB10125	SAMD00233601	Japan:Niigata	2018	CC1	ST2725
K18-4-93	PRJDB10125	SAMD00233526	Japan:Niigata	2018	CC1	ST2725
K18-5-155	PRJDB10125	SAMD00233603	Japan:Niigata	2018	CC1	ST2725
K18-5-170	PRJDB10125	SAMD00233604	Japan:Niigata	2018	CC1	ST2725
K18-5-205	PRJDB10125	SAMD00233605	Japan:Niigata	2018	CC1	ST2725
K18-5-35	PRJDB10125	SAMD00233504	Japan:Niigata	2018	CC1	ST2725
K18-5-403	PRJDB10125	SAMD00233519	Japan:Niigata	2018	CC5	ST5
K18-5-415	PRJDB10125	SAMD00233520	Japan:Niigata	2018	CC5	ST5
K18-5-419	PRJDB10125	SAMD00233607	Japan:Niigata	2018	CC1	ST2725
K18-5-42	PRJDB10125	SAMD00233608	Japan:Niigata	2018	CC1	ST2725
K18-5-424	PRJDB10125	SAMD00233609	Japan:Niigata	2018	CC1	ST2725
K18-5-45	PRJDB10125	SAMD00233512	Japan:Niigata	2018	CC5	ST5
K18-5-567	PRJDB10125	SAMD00233507	Japan:Niigata	2018	CC1	ST2725
K18-5-568	PRJDB10125	SAMD00233565	Japan:Niigata	2018	CC1	ST2725
K18-5-602	PRJDB10125	SAMD00233575	Japan:Niigata	2018	CC1	ST2725
K18-5-71	PRJDB10125	SAMD00233582	Japan:Niigata	2018	CC1	ST2725
K18-6-105	PRJDB10125	SAMD00233538	Japan:Niigata	2018	CC5	ST5
K18-6-117	PRJDB10125	SAMD00233524	Japan:Niigata	2018	CC1	ST2725
K18-6-118	PRJDB10125	SAMD00233566	Japan:Niigata	2018	CC1	ST2725
K18-6-166	PRJDB10125	SAMD00233551	Japan:Niigata	2018	CC1	ST2725
K18-6-188	PRJDB10125	SAMD00233527	Japan:Niigata	2018	CC1	ST2725
K18-6-191	PRJDB10125	SAMD00233610	Japan:Niigata	2018	CC1	ST2725
K18-6-235	PRJDB10125	SAMD00233554	Japan:Niigata	2018	CC1	ST2725
K18-6-241	PRJDB10125	SAMD00233539	Japan:Niigata	2018	CC5	ST5
K18-6-266	PRJDB10125	SAMD00233611	Japan:Niigata	2018	CC1	ST2725
K18-6-295	PRJDB10125	SAMD00233552	Japan:Niigata	2018	CC1	ST2725
K18-6-313	PRJDB10125	SAMD00233553	Japan:Niigata	2018	CC1	ST2725
K18-6-314	PRJDB10125	SAMD00233591	Japan:Niigata	2018	CC1	ST2725
K18-6-363	PRJDB10125	SAMD00233576	Japan:Niigata	2018	CC1	ST2725
K18-6-430	PRJDB10125	SAMD00233577	Japan:Niigata	2018	CC1	ST2725
K18-6-464	PRJDB10125	SAMD00233528	Japan:Niigata	2018	CC8	ST8
K18-6-468	PRJDB10125	SAMD00233555	Japan:Niigata	2018	CC1	ST2725
K18-6-470	PRJDB10125	SAMD00233556	Japan:Niigata	2018	CC1	ST1
K18-6-492	PRJDB10125	SAMD00233557	Japan:Niigata	2018	CC1	ST2725
K18-6-498	PRJDB10125	SAMD00233612	Japan:Niigata	2018	CC5	ST764
K18-6-557	PRJDB10125	SAMD00233542	Japan:Niigata	2018	CC1	ST2725
K18-6-8	PRJDB10125	SAMD00233583	Japan:Niigata	2018	CC1	ST2725
K18-7-103	PRJDB10125	SAMD00233613	Japan:Niigata	2018	CC1	ST2725
K18-7-105	PRJDB10125	SAMD00233540	Japan:Niigata	2018	CC1	ST2725
K18-7-106	PRJDB10125	SAMD00233510	Japan:Niigata	2018	CC5	ST764
K18-7-177	PRJDB10125	SAMD00233547	Japan:Niigata	2018	CC1	ST2725
K18-7-452	PRJDB10125	SAMD00233614	Japan:Niigata	2018	CC1	ST2725
K18-7-455	PRJDB10125	SAMD00233615	Japan:Niigata	2018	CC1	ST2725
K18-7-461	PRJDB10125	SAMD00233525	Japan:Niigata	2018	CC1	ST2725
K18-7-524	PRJDB10125	SAMD00233543	Japan:Niigata	2018	CC1	ST2725
K18-7-547	PRJDB10125	SAMD00233573	Japan:Niigata	2018	CC1	ST2725
K18-7-85	PRJDB10125	SAMD00233545	Japan:Niigata	2018	CC5	ST764
K18-7-89	PRJDB10125	SAMD00233616	Japan:Niigata	2018	CC1	ST2725
K18-7-9	PRJDB10125	SAMD00233514	Japan:Niigata	2018	CC5	ST5
K18-8-141	PRJDB10125	SAMD00233564	Japan:Niigata	2018	CC5	ST764
K18-8-193	PRJDB10125	SAMD00233617	Japan:Niigata	2018	CC1	ST2725
K18-8-226	PRJDB10125	SAMD00233618	Japan:Niigata	2018	CC1	ST2725
K18-8-258	PRJDB10125	SAMD00233521	Japan:Niigata	2018	CC5	ST5
K18-8-261	PRJDB10125	SAMD00233558	Japan:Niigata	2018	CC1	ST2725
K18-8-269	PRJDB10125	SAMD00233619	Japan:Niigata	2018	CC1	ST2725
K18-8-274	PRJDB10125	SAMD00233559	Japan:Niigata	2018	CC5	ST5
K18-8-328	PRJDB10125	SAMD00233620	Japan:Niigata	2018	CC1	ST2725
K18-8-341	PRJDB10125	SAMD00233529	Japan:Niigata	2018	CC1	ST2725
K18-8-412	PRJDB10125	SAMD00233537	Japan:Niigata	2018	CC5	ST5
K18-8-45	PRJDB10125	SAMD00233515	Japan:Niigata	2018	CC5	ST5
K18-8-460	PRJDB10125	SAMD00233621	Japan:Niigata	2018	CC5	ST764
K18-8-494	PRJDB10125	SAMD00233505	Japan:Niigata	2018	CC1	ST2725
K18-8-588	PRJDB10125	SAMD00233622	Japan:Niigata	2018	CC1	ST2725
K18-8-59	PRJDB10125	SAMD00233560	Japan:Niigata	2018	CC1	ST2725
K18-8-601	PRJDB10125	SAMD00233522	Japan:Niigata	2018	CC8	ST8
K18-8-626	PRJDB10125	SAMD00233623	Japan:Niigata	2018	CC1	ST2725
K18-8-635	PRJDB10125	SAMD00233516	Japan:Niigata	2018	CC5	ST5
K18-8-661	PRJDB10125	SAMD00233523	Japan:Niigata	2018	CC8	ST8
K18-8-663	PRJDB10125	SAMD00233544	Japan:Niigata	2018	CC1	ST2725
K18-8-666	PRJDB10125	SAMD00233624	Japan:Niigata	2018	CC1	ST2725
K18-8-696	PRJDB10125	SAMD00233625	Japan:Niigata	2018	CC8	ST8
K18-8-711	PRJDB10125	SAMD00233508	Japan:Niigata	2018	CC1	ST2725
K18-8-712	PRJDB10125	SAMD00233509	Japan:Niigata	2018	CC1	ST2725
K18-9-106	PRJDB10125	SAMD00233511	Japan:Niigata	2018	CC1	ST2725
K18-9-136	PRJDB10125	SAMD00233561	Japan:Niigata	2018	CC1	ST2725
K18-9-159	PRJDB10125	SAMD00233533	Japan:Niigata	2018	CC1	ST2725
K18-9-185	PRJDB10125	SAMD00233534	Japan:Niigata	2018	CC1	ST2725
K18-9-196	PRJDB10125	SAMD00233626	Japan:Niigata	2018	CC5	ST5
K18-9-210	PRJDB10125	SAMD00233548	Japan:Niigata	2018	CC1	ST2725
K18-9-217	PRJDB10125	SAMD00233627	Japan:Niigata	2018	CC1	ST2725
K18-9-274	PRJDB10125	SAMD00233562	Japan:Niigata	2018	CC5	ST5
K18-9-291	PRJDB10125	SAMD00233628	Japan:Niigata	2018	CC1	ST2725
K18-9-292	PRJDB10125	SAMD00233578	Japan:Niigata	2018	CC1	ST2725
K18-9-387	PRJDB10125	SAMD00233629	Japan:Niigata	2018	CC1	ST2725
K18-9-388	PRJDB10125	SAMD00233579	Japan:Niigata	2018	CC1	ST2725
K18-9-418	PRJDB10125	SAMD00233574	Japan:Niigata	2018	CC1	ST2725
K18-9-45	PRJDB10125	SAMD00233517	Japan:Niigata	2018	CC5	ST764
K18-9-469	PRJDB10125	SAMD00233630	Japan:Niigata	2018	CC1	ST2725
K18-9-494	PRJDB10125	SAMD00233506	Japan:Niigata	2018	CC1	ST2725
K18-9-523	PRJDB10125	SAMD00233631	Japan:Niigata	2018	CC1	ST2725
K18-9-530	PRJDB10125	SAMD00233632	Japan:Niigata	2018	CC1	ST2725
K18-9-551	PRJDB10125	SAMD00233633	Japan:Niigata	2018	CC8	ST8
K18-9-607	PRJDB10125	SAMD00233634	Japan:Niigata	2018	CC1	ST2725
K18-9-85	PRJDB10125	SAMD00233546	Japan:Niigata	2018	CC5	ST764
N101y	PRJDB9790	SAMD00223507	Japan	1983-02-04	CC5	ST5
N106	PRJDB9790	SAMD00223492	Japan	1982-12-21	CC5	ST5
N164	PRJDB9790	SAMD00223508	Japan	-	CC8	ST8
N18-4-1	PRJDB10125	SAMD00233635	Japan:Niigata	2018	CC1	ST2725
N18-4-10	PRJDB10125	SAMD00233641	Japan:Niigata	2018	CC1	ST2725
N18-4-3	PRJDB10125	SAMD00233636	Japan:Niigata	2018	CC1	ST2725
N18-4-4	PRJDB10125	SAMD00233637	Japan:Niigata	2018	CC5	ST764
N18-4-6	PRJDB10125	SAMD00233640	Japan:Niigata	2018	CC1	ST2725
N18-4-7	PRJDB10125	SAMD00233642	Japan:Niigata	2018	CC8	ST8
N18-4-8	PRJDB10125	SAMD00233643	Japan:Niigata	2018	CC1	ST2725
N18-4-9	PRJDB10125	SAMD00233644	Japan:Niigata	2018	CC1	ST2725
N18-5-13	PRJDB10125	SAMD00233648	Japan:Niigata	2018	CC1	ST2725
N18-5-14	PRJDB10125	SAMD00233649	Japan:Niigata	2018	CC1	ST2725
N18-5-16	PRJDB10125	SAMD00233651	Japan:Niigata	2018	CC1	ST2725
N18-5-18	PRJDB10125	SAMD00233652	Japan:Niigata	2018	CC1	ST2725
N18-5-19	PRJDB10125	SAMD00233654	Japan:Niigata	2018	CC1	ST2725
N18-6-20	PRJDB10125	SAMD00233646	Japan:Niigata	2018	CC5	ST764
N18-6-21	PRJDB10125	SAMD00233655	Japan:Niigata	2018	CC1	ST2725
N18-6-22	PRJDB10125	SAMD00233660	Japan:Niigata	2018	CC1	ST2725
N18-6-23	PRJDB10125	SAMD00233662	Japan:Niigata	2018	CC1	ST2725
N18-6-24	PRJDB10125	SAMD00233663	Japan:Niigata	2018	CC1	ST1
N18-6-25	PRJDB10125	SAMD00233664	Japan:Niigata	2018	CC1	ST2725
N18-6-26	PRJDB10125	SAMD00233656	Japan:Niigata	2018	CC1	ST2725
N18-6-27	PRJDB10125	SAMD00233665	Japan:Niigata	2018	CC1	ST2725
N18-6-28	PRJDB10125	SAMD00233667	Japan:Niigata	2018	CC1	ST2725
N18-6-29	PRJDB10125	SAMD00233669	Japan:Niigata	2018	CC1	ST2725
N18-7-30	PRJDB10125	SAMD00233653	Japan:Niigata	2018	CC1	ST2725
N18-7-32	PRJDB10125	SAMD00233671	Japan:Niigata	2018	CC1	ST1
N18-7-33	PRJDB10125	SAMD00233661	Japan:Niigata	2018	CC1	ST2725
N18-7-34	PRJDB10125	SAMD00233657	Japan:Niigata	2018	CC5	ST764
N18-8-35	PRJDB10125	SAMD00233658	Japan:Niigata	2018	CC5	ST764
N18-8-36	PRJDB10125	SAMD00233672	Japan:Niigata	2018	CC1	ST2725
N18-8-37	PRJDB10125	SAMD00233673	Japan:Niigata	2018	CC1	ST2725
N18-8-38	PRJDB10125	SAMD00233675	Japan:Niigata	2018	CC1	ST2725
N18-8-39	PRJDB10125	SAMD00233659	Japan:Niigata	2018	CC5	ST764
N18-8-40	PRJDB10125	SAMD00233676	Japan:Niigata	2018	CC8	ST8
N18-8-41	PRJDB10125	SAMD00233677	Japan:Niigata	2018	CC1	ST2725
N18-9-47	PRJDB10125	SAMD00233680	Japan:Niigata	2018	CC1	ST1
N18-9-48	PRJDB10125	SAMD00233681	Japan:Niigata	2018	CC1	ST2725
N18-9-49	PRJDB10125	SAMD00233682	Japan:Niigata	2018	CC1	ST2725
N279	PRJDB9790	SAMD00223488	Japan	1983-02-08	CC5	ST5
N28	PRJDB9790	SAMD00223501	Japan	1982-12-03	CC8	ST8
N283	PRJDB9790	SAMD00223489	Japan	1983-02-02	CC5	ST5
N315	PRJDB9790	SAMD00223493	Japan	1982-07-14	CC5	ST5
N345	PRJDB9790	SAMD00223491	Japan	1983-05-04	CC5	ST5
N98	PRJDB9790	SAMD00223487	Japan	1983-01-13	CC5	ST5
patient#10	PRJDB6628	SAMD00108625	Japan:Kanazawa	2016-03-17	CC5	ST5
patient#104	PRJDB6628	SAMD00108525	Japan:Kanazawa	2016-03-17	CC5	ST5
patient#105	PRJDB6628	SAMD00108526	Japan:Kanazawa	2016-03-17	CC5	ST5
patient#107	PRJDB6628	SAMD00108528	Japan:Kanazawa	2016-03-17	CC5	ST764
patient#108	PRJDB6628	SAMD00108529	Japan:Kanazawa	2016-03-17	CC5	ST5
patient#109	PRJDB6628	SAMD00108530	Japan:Kanazawa	2016-03-17	CC5	ST5
patient#11	PRJDB6628	SAMD00108626	Japan:Kanazawa	2016-03-17	CC5	ST5
patient#111	PRJDB6628	SAMD00108532	Japan:Kanazawa	2016-03-17	CC5	ST5
patient#112	PRJDB6628	SAMD00108533	Japan:Kanazawa	2016-03-17	CC1	ST1
patient#113	PRJDB6628	SAMD00108534	Japan:Kanazawa	2016-03-17	CC5	ST5
patient#115	PRJDB6628	SAMD00108536	Japan:Kanazawa	2016-03-17	CC5	ST764
patient#116	PRJDB6628	SAMD00108537	Japan:Kanazawa	2016-03-17	CC5	ST5
patient#117	PRJDB6628	SAMD00108538	Japan:Kanazawa	2016-03-17	CC8	ST8
patient#118	PRJDB6628	SAMD00108539	Japan:Kanazawa	2016-03-17	CC5	ST5
patient#119	PRJDB6628	SAMD00108540	Japan:Kanazawa	2016-03-17	CC8	ST8
patient#12	PRJDB6628	SAMD00108627	Japan:Kanazawa	2016-03-17	CC5	ST5
patient#121	PRJDB6628	SAMD00108542	Japan:Kanazawa	2016-03-17	CC5	ST5
patient#124	PRJDB6628	SAMD00108545	Japan:Kanazawa	2016-03-17	CC5	ST5
patient#125	PRJDB6628	SAMD00108546	Japan:Kanazawa	2016-03-17	CC8	ST8
patient#126	PRJDB6628	SAMD00108547	Japan:Kanazawa	2016-03-17	CC8	ST8
patient#129	PRJDB6628	SAMD00108550	Japan:Kanazawa	2016-03-17	CC5	ST5
patient#13	PRJDB6628	SAMD00108628	Japan:Kanazawa	2016-03-17	CC5	ST5
patient#130	PRJDB6628	SAMD00108551	Japan:Kanazawa	2016-03-17	CC5	ST5
patient#132	PRJDB6628	SAMD00108553	Japan:Kanazawa	2016-03-17	CC8	ST8
patient#134	PRJDB6628	SAMD00108555	Japan:Kanazawa	2016-03-17	CC5	ST5
patient#137	PRJDB6628	SAMD00108558	Japan:Kanazawa	2016-03-17	CC5	ST764
patient#138	PRJDB6628	SAMD00108559	Japan:Kanazawa	2016-03-17	CC5	ST5
patient#139	PRJDB6628	SAMD00108560	Japan:Kanazawa	2016-03-17	CC5	ST5
patient#14	PRJDB6628	SAMD00108629	Japan:Kanazawa	2016-03-17	CC5	ST5
patient#140	PRJDB6628	SAMD00108561	Japan:Kanazawa	2016-03-17	CC5	ST764
patient#141	PRJDB6628	SAMD00108562	Japan:Kanazawa	2016-03-17	CC1	ST1
patient#142	PRJDB6628	SAMD00108563	Japan:Kanazawa	2016-03-17	CC1	ST1
patient#143	PRJDB6628	SAMD00108564	Japan:Kanazawa	2016-03-17	CC5	ST5
patient#144	PRJDB6628	SAMD00108565	Japan:Kanazawa	2016-03-17	CC5	ST5
patient#146	PRJDB6628	SAMD00108567	Japan:Kanazawa	2016-03-17	CC5	ST5
patient#149	PRJDB6628	SAMD00108570	Japan:Kanazawa	2016-03-17	CC5	ST764
patient#15	PRJDB6628	SAMD00108630	Japan:Kanazawa	2016-03-17	CC5	ST5
patient#150	PRJDB6628	SAMD00108571	Japan:Kanazawa	2016-03-17	CC1	ST1
patient#151	PRJDB6628	SAMD00108572	Japan:Kanazawa	2016-03-17	CC5	ST5
patient#152	PRJDB6628	SAMD00108573	Japan:Kanazawa	2016-03-17	CC5	ST5
patient#153	PRJDB6628	SAMD00108574	Japan:Kanazawa	2016-03-17	CC5	ST764
patient#154	PRJDB6628	SAMD00108575	Japan:Kanazawa	2016-03-17	CC1	ST1
patient#155	PRJDB6628	SAMD00108576	Japan:Kanazawa	2016-03-17	CC5	ST5
patient#156	PRJDB6628	SAMD00108577	Japan:Kanazawa	2016-03-17	CC5	ST5
patient#157	PRJDB6628	SAMD00108578	Japan:Kanazawa	2016-03-17	CC1	ST1
patient#159	PRJDB6628	SAMD00108580	Japan:Kanazawa	2016-03-17	CC5	ST5
patient#16	PRJDB6628	SAMD00108631	Japan:Kanazawa	2016-03-17	CC5	ST5
patient#162	PRJDB6628	SAMD00108583	Japan:Kanazawa	2016-03-17	CC5	ST5
patient#163	PRJDB6628	SAMD00108584	Japan:Kanazawa	2016-03-17	CC5	ST764
patient#164	PRJDB6628	SAMD00108585	Japan:Kanazawa	2016-03-17	CC5	ST5
patient#166	PRJDB6628	SAMD00108587	Japan:Kanazawa	2016-03-17	CC8	ST8
patient#167	PRJDB6628	SAMD00108588	Japan:Kanazawa	2016-03-17	CC8	ST8
patient#168	PRJDB6628	SAMD00108589	Japan:Kanazawa	2016-03-17	CC5	ST764
patient#169	PRJDB6628	SAMD00108590	Japan:Kanazawa	2016-03-17	CC8	ST8
patient#17	PRJDB6628	SAMD00108632	Japan:Kanazawa	2016-03-17	CC5	ST5
patient#170	PRJDB6628	SAMD00108591	Japan:Kanazawa	2016-03-17	CC5	ST764
patient#171	PRJDB6628	SAMD00108592	Japan:Kanazawa	2016-03-17	CC5	ST764
patient#172	PRJDB6628	SAMD00108593	Japan:Kanazawa	2016-03-17	CC5	ST5
patient#173	PRJDB6628	SAMD00108594	Japan:Kanazawa	2016-03-17	CC8	ST8
patient#174	PRJDB6628	SAMD00108595	Japan:Kanazawa	2016-03-17	CC8	ST8
patient#175	PRJDB6628	SAMD00108596	Japan:Kanazawa	2016-03-17	CC8	ST8
patient#176	PRJDB6628	SAMD00108597	Japan:Kanazawa	2016-03-17	CC1	ST1
patient#177	PRJDB6628	SAMD00108598	Japan:Kanazawa	2016-03-17	CC1	ST1
patient#178	PRJDB6628	SAMD00108599	Japan:Kanazawa	2016-03-17	CC1	ST1
patient#179	PRJDB6628	SAMD00108600	Japan:Kanazawa	2016-03-17	CC5	ST5
patient#18	PRJDB6628	SAMD00108633	Japan:Kanazawa	2016-03-17	CC5	ST764
patient#180	PRJDB6628	SAMD00108601	Japan:Kanazawa	2016-03-17	CC5	ST5
patient#182	PRJDB6628	SAMD00108602	Japan:Kanazawa	2016-03-17	CC5	ST5
patient#183	PRJDB6628	SAMD00108603	Japan:Kanazawa	2016-03-17	CC1	ST1
patient#19	PRJDB6628	SAMD00108634	Japan:Kanazawa	2016-03-17	CC5	ST5
patient#190	PRJDB6628	SAMD00108610	Japan:Kanazawa	2016-03-17	CC8	ST8
patient#191	PRJDB6628	SAMD00108611	Japan:Kanazawa	2016-03-17	CC8	ST8
patient#193	PRJDB6628	SAMD00108613	Japan:Kanazawa	2016-03-17	CC5	ST5
patient#194	PRJDB6628	SAMD00108614	Japan:Kanazawa	2016-03-17	CC5	ST764
patient#195	PRJDB6628	SAMD00108615	Japan:Kanazawa	2016-03-17	CC1	ST1
patient#196	PRJDB6628	SAMD00108616	Japan:Kanazawa	2016-03-17	CC5	ST5
patient#198	PRJDB6628	SAMD00108618	Japan:Kanazawa	2016-03-17	CC5	ST5
patient#20	PRJDB6628	SAMD00108635	Japan:Kanazawa	2016-03-17	CC5	ST5
patient#200	PRJDB6628	SAMD00108620	Japan:Kanazawa	2016-03-17	CC8	ST8
patient#21	PRJDB6628	SAMD00108636	Japan:Kanazawa	2016-03-17	CC5	ST5
patient#22	PRJDB6628	SAMD00108637	Japan:Kanazawa	2016-03-17	CC5	ST5
patient#23	PRJDB6628	SAMD00108638	Japan:Kanazawa	2016-03-17	CC5	ST5
patient#24	PRJDB6628	SAMD00108639	Japan:Kanazawa	2016-03-17	CC5	ST5
patient#25	PRJDB6628	SAMD00108640	Japan:Kanazawa	2016-03-17	CC5	ST5
patient#26	PRJDB6628	SAMD00108641	Japan:Kanazawa	2016-03-17	CC5	ST5
patient#27	PRJDB6628	SAMD00108642	Japan:Kanazawa	2016-03-17	CC5	ST5
patient#28	PRJDB6628	SAMD00108643	Japan:Kanazawa	2016-03-17	CC5	ST5
patient#29	PRJDB6628	SAMD00108644	Japan:Kanazawa	2016-03-17	CC5	ST5
patient#30	PRJDB6628	SAMD00108645	Japan:Kanazawa	2016-03-17	CC5	ST5
patient#31	PRJDB6628	SAMD00108646	Japan:Kanazawa	2016-03-17	CC5	ST5
patient#32	PRJDB6628	SAMD00108647	Japan:Kanazawa	2016-03-17	CC5	ST764
patient#33	PRJDB6628	SAMD00108648	Japan:Kanazawa	2016-03-17	CC1	ST1
patient#34	PRJDB6628	SAMD00108649	Japan:Kanazawa	2016-03-17	CC1	ST1
patient#35	PRJDB6628	SAMD00108650	Japan:Kanazawa	2016-03-17	CC1	ST1
patient#37	PRJDB6628	SAMD00108651	Japan:Kanazawa	2016-03-17	CC5	ST5
patient#38	PRJDB6628	SAMD00108652	Japan:Kanazawa	2016-03-17	CC1	ST1
patient#39	PRJDB6628	SAMD00108653	Japan:Kanazawa	2016-03-17	CC1	ST1
patient#40	PRJDB6628	SAMD00108654	Japan:Kanazawa	2016-03-17	CC1	ST1
patient#42	PRJDB6628	SAMD00108656	Japan:Kanazawa	2016-03-17	CC1	ST1
patient#44	PRJDB6628	SAMD00108658	Japan:Kanazawa	2016-03-17	CC1	ST1
patient#45	PRJDB6628	SAMD00108659	Japan:Kanazawa	2016-03-17	CC8	ST8
patient#46	PRJDB6628	SAMD00108660	Japan:Kanazawa	2016-03-17	CC5	ST5
patient#49	PRJDB6628	SAMD00108663	Japan:Kanazawa	2016-03-17	CC1	ST1
patient#50	PRJDB6628	SAMD00108664	Japan:Kanazawa	2016-03-17	CC5	ST764
patient#51	PRJDB6628	SAMD00108665	Japan:Kanazawa	2016-03-17	CC1	ST1
patient#52	PRJDB6628	SAMD00108666	Japan:Kanazawa	2016-03-17	CC1	ST1
patient#56	PRJDB6628	SAMD00108670	Japan:Kanazawa	2016-03-17	CC1	ST1
patient#57	PRJDB6628	SAMD00108671	Japan:Kanazawa	2016-03-17	CC1	ST1
patient#59	PRJDB6628	SAMD00108673	Japan:Kanazawa	2016-03-17	CC1	ST1
patient#6	PRJDB6628	SAMD00108621	Japan:Kanazawa	2016-03-17	CC5	ST5
patient#61	PRJDB6628	SAMD00108675	Japan:Kanazawa	2016-03-17	CC1	ST1
patient#64	PRJDB6628	SAMD00108678	Japan:Kanazawa	2016-03-17	CC1	ST1
patient#7	PRJDB6628	SAMD00108622	Japan:Kanazawa	2016-03-17	CC5	ST5
patient#8	PRJDB6628	SAMD00108623	Japan:Kanazawa	2016-03-17	CC5	ST5
patient#9	PRJDB6628	SAMD00108624	Japan:Kanazawa	2016-03-17	CC5	ST5
SAMD00411961	PRJDB12488	SAMD00411961	Japan	-	CC8	ST8
SAMD00411962	PRJDB12488	SAMD00411962	Japan	-	CC5	ST764
SAMD00411963	PRJDB12488	SAMD00411963	Japan	-	CC8	ST8
SAMD00411965	PRJDB12488	SAMD00411965	Japan	-	CC8	ST8
SAMD00411966	PRJDB12488	SAMD00411966	Japan	-	CC1	ST1
SAMD00411967	PRJDB12488	SAMD00411967	Japan	-	CC1	ST2725
SAMD00411968	PRJDB12488	SAMD00411968	Japan	-	CC5	ST5
SAMD00411970	PRJDB12488	SAMD00411970	Japan	-	CC5	ST5
SAMD00411971	PRJDB12488	SAMD00411971	Japan	-	CC5	ST5
SAMD00411972	PRJDB12488	SAMD00411972	Japan	-	CC1	ST1
SAMD00411973	PRJDB12488	SAMD00411973	Japan	-	CC1	ST1
SAMD00411974	PRJDB12488	SAMD00411974	Japan	-	CC1	ST2725
SAMD00411975	PRJDB12488	SAMD00411975	Japan	-	CC1	ST1
SAMD00411976	PRJDB12488	SAMD00411976	Japan	-	CC1	ST1
SAMD00411977	PRJDB12488	SAMD00411977	Japan	-	CC8	ST8
SAMD00411978	PRJDB12488	SAMD00411978	Japan	-	CC1	ST1
SAMD00411979	PRJDB12488	SAMD00411979	Japan	-	CC8	ST8
SAMD00411980	PRJDB12488	SAMD00411980	Japan	-	CC8	ST8
SAMD00411981	PRJDB12488	SAMD00411981	Japan	-	CC5	ST5
SAMD00411983	PRJDB12488	SAMD00411983	Japan	-	CC1	ST2725
SAMD00411984	PRJDB12488	SAMD00411984	Japan	-	CC8	ST8
SAMD00411985	PRJDB12488	SAMD00411985	Japan	-	CC1	ST2725
SAMD00411986	PRJDB12488	SAMD00411986	Japan	-	CC5	ST764
SAMD00411987	PRJDB12488	SAMD00411987	Japan	-	CC1	ST1
SAMD00411988	PRJDB12488	SAMD00411988	Japan	-	CC1	ST2725
SAMD00411989	PRJDB12488	SAMD00411989	Japan	-	CC8	ST8
SAMD00411990	PRJDB12488	SAMD00411990	Japan	-	CC8	ST8
SAMD00411991	PRJDB12488	SAMD00411991	Japan	-	CC5	ST5
SAMD00411992	PRJDB12488	SAMD00411992	Japan	-	CC5	ST764
SAMD00411993	PRJDB12488	SAMD00411993	Japan	-	CC1	ST1
SAMD00411994	PRJDB12488	SAMD00411994	Japan	-	CC1	ST2725
SAMD00411995	PRJDB12488	SAMD00411995	Japan	-	CC1	ST1
SAMD00411996	PRJDB12488	SAMD00411996	Japan	-	CC1	ST1
SAMD00411997	PRJDB12488	SAMD00411997	Japan	-	CC8	ST8
SAMD00411998	PRJDB12488	SAMD00411998	Japan	-	CC8	ST8
SAMD00411999	PRJDB12488	SAMD00411999	Japan	-	CC8	ST8
SAMD00412000	PRJDB12488	SAMD00412000	Japan	-	CC8	ST8
SAMD00412001	PRJDB12488	SAMD00412001	Japan	-	CC5	ST5
SAMD00412002	PRJDB12488	SAMD00412002	Japan	-	CC5	ST764
SAMD00412003	PRJDB12488	SAMD00412003	Japan	-	CC5	ST5
SAMD00412004	PRJDB12488	SAMD00412004	Japan	-	CC1	ST2725
SAMD00412005	PRJDB12488	SAMD00412005	Japan	-	CC8	ST8
SAMD00412006	PRJDB12488	SAMD00412006	Japan	-	CC1	ST1
SAMD00412007	PRJDB12488	SAMD00412007	Japan	-	CC8	ST8
SAMD00412008	PRJDB12488	SAMD00412008	Japan	-	CC8	ST8
SAMD00412009	PRJDB12488	SAMD00412009	Japan	-	CC1	ST1
SAMD00412010	PRJDB12488	SAMD00412010	Japan	-	CC1	ST1
SAMD00412011	PRJDB12488	SAMD00412011	Japan	-	CC1	ST1
SAMD00412012	PRJDB12488	SAMD00412012	Japan	-	CC1	ST1
SAMD00412013	PRJDB12488	SAMD00412013	Japan	-	CC1	ST2725
SAMD00412014	PRJDB12488	SAMD00412014	Japan	-	CC1	ST1
SAMD00412015	PRJDB12488	SAMD00412015	Japan	-	CC5	ST5
SAMD00412018	PRJDB12488	SAMD00412018	Japan	-	CC8	ST8
SAMD00412020	PRJDB12488	SAMD00412020	Japan	-	CC1	ST2725
SAMD00412021	PRJDB12488	SAMD00412021	Japan	-	CC5	ST764
SAMD00412022	PRJDB12488	SAMD00412022	Japan	-	CC1	ST1
SAMD00412023	PRJDB12488	SAMD00412023	Japan	-	CC1	ST1
SAMD00412024	PRJDB12488	SAMD00412024	Japan	-	CC8	ST8
SAMD00412025	PRJDB12488	SAMD00412025	Japan	-	CC1	ST1
SAMD00412026	PRJDB12488	SAMD00412026	Japan	-	CC1	ST1
SAMD00412027	PRJDB12488	SAMD00412027	Japan	-	CC8	ST8
SAMD00412028	PRJDB12488	SAMD00412028	Japan	-	CC8	ST8
SAMD00412031	PRJDB12488	SAMD00412031	Japan	-	CC8	ST8
SAMD00412032	PRJDB12488	SAMD00412032	Japan	-	CC1	ST1
SAMD00412033	PRJDB12488	SAMD00412033	Japan	-	CC8	ST8
SAMD00412034	PRJDB12488	SAMD00412034	Japan	-	CC8	ST8
SAMD00412035	PRJDB12488	SAMD00412035	Japan	-	CC1	ST1
SAMD00412036	PRJDB12488	SAMD00412036	Japan	-	CC8	ST8
SAMD00412037	PRJDB12488	SAMD00412037	Japan	-	CC8	ST8
SAMD00412038	PRJDB12488	SAMD00412038	Japan	-	CC8	ST8
SAMD00412040	PRJDB12488	SAMD00412040	Japan	-	CC8	ST8
SAMD00412042	PRJDB12488	SAMD00412042	Japan	-	CC5	ST5
SAMD00412043	PRJDB12488	SAMD00412043	Japan	-	CC1	ST1
SAMD00412044	PRJDB12488	SAMD00412044	Japan	-	CC8	ST8
SAMD00412045	PRJDB12488	SAMD00412045	Japan	-	CC1	ST2725
SAMD00412046	PRJDB12488	SAMD00412046	Japan	-	CC5	ST764
SAMD00412047	PRJDB12488	SAMD00412047	Japan	-	CC5	ST5
SAMD00412048	PRJDB12488	SAMD00412048	Japan	-	CC1	ST1
SAMD00412049	PRJDB12488	SAMD00412049	Japan	-	CC1	ST1
SAMD00412050	PRJDB12488	SAMD00412050	Japan	-	CC1	ST1
SAMD00412052	PRJDB12488	SAMD00412052	Japan	-	CC1	ST1
SAMD00412055	PRJDB12488	SAMD00412055	Japan	-	CC8	ST8
SAMD00412057	PRJDB12488	SAMD00412057	Japan	-	CC1	ST1
SAMD00412058	PRJDB12488	SAMD00412058	Japan	-	CC1	ST1
SAMD00412059	PRJDB12488	SAMD00412059	Japan	-	CC1	ST1
SAMD00412061	PRJDB12488	SAMD00412061	Japan	-	CC1	ST1
SAMD00412062	PRJDB12488	SAMD00412062	Japan	-	CC5	ST764
SAMD00412064	PRJDB12488	SAMD00412064	Japan	-	CC8	ST8
SAMD00412065	PRJDB12488	SAMD00412065	Japan	-	CC8	ST8
SAMD00412066	PRJDB12488	SAMD00412066	Japan	-	CC8	ST8
SAMD00412067	PRJDB12488	SAMD00412067	Japan	-	CC1	ST2725
SAMD00412068	PRJDB12488	SAMD00412068	Japan	-	CC1	ST1
SAMD00412069	PRJDB12488	SAMD00412069	Japan	-	CC5	ST764
SAMD00412070	PRJDB12488	SAMD00412070	Japan	-	CC1	ST1
SAMD00412071	PRJDB12488	SAMD00412071	Japan	-	CC8	ST8
SAMD00412072	PRJDB12488	SAMD00412072	Japan	-	CC8	ST8
SAMD00412073	PRJDB12488	SAMD00412073	Japan	-	CC8	ST8
SAMD00412076	PRJDB12488	SAMD00412076	Japan	-	CC1	ST2725
SAMD00412077	PRJDB12488	SAMD00412077	Japan	-	CC8	ST8
SAMD00412078	PRJDB12488	SAMD00412078	Japan	-	CC1	ST2725
SAMD00412079	PRJDB12488	SAMD00412079	Japan	-	CC1	ST2725
SAMD00412081	PRJDB12488	SAMD00412081	Japan	-	CC1	ST1
SAMD00412083	PRJDB12488	SAMD00412083	Japan	-	CC1	ST1
SAMD00412084	PRJDB12488	SAMD00412084	Japan	-	CC1	ST1
SAMD00412086	PRJDB12488	SAMD00412086	Japan	-	CC8	ST8
SAMD00412088	PRJDB12488	SAMD00412088	Japan	-	CC1	ST2725
SAMD00412089	PRJDB12488	SAMD00412089	Japan	-	CC8	ST8
SAMD00412090	PRJDB12488	SAMD00412090	Japan	-	CC5	ST764
SAMD00412091	PRJDB12488	SAMD00412091	Japan	-	CC1	ST2725
SAMD00412093	PRJDB12488	SAMD00412093	Japan	-	CC1	ST2725
SAMD00412094	PRJDB12488	SAMD00412094	Japan	-	CC8	ST8
SAMD00412095	PRJDB12488	SAMD00412095	Japan	-	CC1	ST1
SAMD00412097	PRJDB12488	SAMD00412097	Japan	-	CC5	ST764
SAMD00412098	PRJDB12488	SAMD00412098	Japan	-	CC1	ST2725
SAMD00412099	PRJDB12488	SAMD00412099	Japan	-	CC8	ST8
SAMD00412100	PRJDB12488	SAMD00412100	Japan	-	CC5	ST764
SAMD00412101	PRJDB12488	SAMD00412101	Japan	-	CC8	ST8
SAMD00412105	PRJDB12488	SAMD00412105	Japan	-	CC1	ST1
SAMD00412106	PRJDB12488	SAMD00412106	Japan	-	CC1	ST1
SAMD00412108	PRJDB12488	SAMD00412108	Japan	-	CC1	ST1
SAMD00412110	PRJDB12488	SAMD00412110	Japan	-	CC8	ST8
SAMD00412111	PRJDB12488	SAMD00412111	Japan	-	CC5	ST764
SAMD00412114	PRJDB12488	SAMD00412114	Japan	-	CC1	ST2725
SAMD00412115	PRJDB12488	SAMD00412115	Japan	-	CC8	ST8
SAMD00412116	PRJDB12488	SAMD00412116	Japan	-	CC8	ST8
SAMD00412117	PRJDB12488	SAMD00412117	Japan	-	CC1	ST2725
SAMD00412119	PRJDB12488	SAMD00412119	Japan	-	CC5	ST5
SAMD00412121	PRJDB12488	SAMD00412121	Japan	-	CC1	ST1
SAMD00412123	PRJDB12488	SAMD00412123	Japan	-	CC8	ST8
SAMD00412124	PRJDB12488	SAMD00412124	Japan	-	CC5	ST5
SAMD00412126	PRJDB12488	SAMD00412126	Japan	-	CC1	ST1
SAMD00412127	PRJDB12488	SAMD00412127	Japan	-	CC8	ST8
SAMD00412128	PRJDB12488	SAMD00412128	Japan	-	CC8	ST8
SAMD00412129	PRJDB12488	SAMD00412129	Japan	-	CC1	ST2725
SAMD00412130	PRJDB12488	SAMD00412130	Japan	-	CC1	ST2725
SAMD00412132	PRJDB12488	SAMD00412132	Japan	-	CC8	ST8
SAMD00412133	PRJDB12488	SAMD00412133	Japan	-	CC5	ST5
SAMD00412134	PRJDB12488	SAMD00412134	Japan	-	CC5	ST5
SAMD00412135	PRJDB12488	SAMD00412135	Japan	-	CC8	ST8
SAMD00412136	PRJDB12488	SAMD00412136	Japan	-	CC1	ST2725
SAMD00412137	PRJDB12488	SAMD00412137	Japan	-	CC5	ST764
SAMD00412138	PRJDB12488	SAMD00412138	Japan	-	CC1	ST2725
SAMD00412139	PRJDB12488	SAMD00412139	Japan	-	CC8	ST8
SAMD00412140	PRJDB12488	SAMD00412140	Japan	-	CC1	ST1
SAMD00412141	PRJDB12488	SAMD00412141	Japan	-	CC1	ST1
SAMD00412145	PRJDB12488	SAMD00412145	Japan	-	CC8	ST8
SAMD00412146	PRJDB12488	SAMD00412146	Japan	-	CC8	ST8
SAMD00412148	PRJDB12488	SAMD00412148	Japan	-	CC8	ST8
SAMD00412149	PRJDB12488	SAMD00412149	Japan	-	CC1	ST1
SAMD00412150	PRJDB12488	SAMD00412150	Japan	-	CC1	ST1
SAMD00412151	PRJDB12488	SAMD00412151	Japan	-	CC8	ST8
SAMD00412152	PRJDB12488	SAMD00412152	Japan	-	CC1	ST1
SAMD00412153	PRJDB12488	SAMD00412153	Japan	-	CC5	ST5
SAMD00412154	PRJDB12488	SAMD00412154	Japan	-	CC8	ST8
SAMD00412155	PRJDB12488	SAMD00412155	Japan	-	CC1	ST1
SAMD00412156	PRJDB12488	SAMD00412156	Japan	-	CC1	ST1
SAMD00412157	PRJDB12488	SAMD00412157	Japan	-	CC1	ST1
SAMD00412158	PRJDB12488	SAMD00412158	Japan	-	CC1	ST1
SAMD00412159	PRJDB12488	SAMD00412159	Japan	-	CC5	ST764
SAMD00412160	PRJDB12488	SAMD00412160	Japan	-	CC8	ST8
SAMD00412161	PRJDB12488	SAMD00412161	Japan	-	CC8	ST8
SAMD00412162	PRJDB12488	SAMD00412162	Japan	-	CC1	ST1
SAMD00412163	PRJDB12488	SAMD00412163	Japan	-	CC5	ST764
SAMD00412164	PRJDB12488	SAMD00412164	Japan	-	CC1	ST1
SAMD00412165	PRJDB12488	SAMD00412165	Japan	-	CC8	ST8
SAMD00412166	PRJDB12488	SAMD00412166	Japan	-	CC8	ST8
SAMD00412167	PRJDB12488	SAMD00412167	Japan	-	CC1	ST1
SAMD00412168	PRJDB12488	SAMD00412168	Japan	-	CC8	ST8
SAMD00412169	PRJDB12488	SAMD00412169	Japan	-	CC1	ST2725
SAMD00412170	PRJDB12488	SAMD00412170	Japan	-	CC5	ST5
SAMD00412171	PRJDB12488	SAMD00412171	Japan	-	CC5	ST764
SAMD00412172	PRJDB12488	SAMD00412172	Japan	-	CC1	ST1
SAMD00412173	PRJDB12488	SAMD00412173	Japan	-	CC8	ST8
SAMD00412174	PRJDB12488	SAMD00412174	Japan	-	CC1	ST1
SAMD00412175	PRJDB12488	SAMD00412175	Japan	-	CC5	ST5
SAMD00412177	PRJDB12488	SAMD00412177	Japan	-	CC8	ST8
SAMD00412178	PRJDB12488	SAMD00412178	Japan	-	CC8	ST8
SAMD00412179	PRJDB12488	SAMD00412179	Japan	-	CC8	ST8
SAMD00412180	PRJDB12488	SAMD00412180	Japan	-	CC8	ST8
SAMD00412181	PRJDB12488	SAMD00412181	Japan	-	CC5	ST5
SAMD00412182	PRJDB12488	SAMD00412182	Japan	-	CC8	ST8
SAMD00412183	PRJDB12488	SAMD00412183	Japan	-	CC8	ST8
SAMD00412184	PRJDB12488	SAMD00412184	Japan	-	CC5	ST5
SAMD00412185	PRJDB12488	SAMD00412185	Japan	-	CC8	ST8
SAMD00412186	PRJDB12488	SAMD00412186	Japan	-	CC8	ST8
SAMD00412187	PRJDB12488	SAMD00412187	Japan	-	CC8	ST8
SAMD00412190	PRJDB12488	SAMD00412190	Japan	-	CC8	ST8
SAMD00412191	PRJDB12488	SAMD00412191	Japan	-	CC8	ST8
SAMD00412192	PRJDB12488	SAMD00412192	Japan	-	CC8	ST8
SAMD00412193	PRJDB12488	SAMD00412193	Japan	-	CC1	ST1
SAMD00412194	PRJDB12488	SAMD00412194	Japan	-	CC5	ST764
SAMD00412195	PRJDB12488	SAMD00412195	Japan	-	CC1	ST1
SAMD00412196	PRJDB12488	SAMD00412196	Japan	-	CC1	ST1
SAMD00412198	PRJDB12488	SAMD00412198	Japan	-	CC8	ST8
SAMD00412199	PRJDB12488	SAMD00412199	Japan	-	CC1	ST1
SAMD00412200	PRJDB12488	SAMD00412200	Japan	-	CC1	ST1
SAMD00412201	PRJDB12488	SAMD00412201	Japan	-	CC1	ST1
SAMD00412202	PRJDB12488	SAMD00412202	Japan	-	CC1	ST1
SAMD00412203	PRJDB12488	SAMD00412203	Japan	-	CC8	ST8
SAMD00412204	PRJDB12488	SAMD00412204	Japan	-	CC1	ST1
SAMD00412205	PRJDB12488	SAMD00412205	Japan	-	CC1	ST1
SAMD00412206	PRJDB12488	SAMD00412206	Japan	-	CC1	ST1
SAMD00412207	PRJDB12488	SAMD00412207	Japan	-	CC1	ST1
SAMD00412208	PRJDB12488	SAMD00412208	Japan	-	CC1	ST1
SAMD00412209	PRJDB12488	SAMD00412209	Japan	-	CC1	ST1
SAMD00412210	PRJDB12488	SAMD00412210	Japan	-	CC5	ST764
SAMD00412211	PRJDB12488	SAMD00412211	Japan	-	CC5	ST764
SAMD00412212	PRJDB12488	SAMD00412212	Japan	-	CC1	ST1
SAMD00412213	PRJDB12488	SAMD00412213	Japan	-	CC5	ST5
SAMD00412214	PRJDB12488	SAMD00412214	Japan	-	CC1	ST1
SAMD00412215	PRJDB12488	SAMD00412215	Japan	-	CC8	ST8
SAMD00412217	PRJDB12488	SAMD00412217	Japan	-	CC8	ST8
SAMD00412218	PRJDB12488	SAMD00412218	Japan	-	CC5	ST5
SAMD00412219	PRJDB12488	SAMD00412219	Japan	-	CC1	ST1
SAMD00412221	PRJDB12488	SAMD00412221	Japan	-	CC1	ST1
SAMD00412224	PRJDB12488	SAMD00412224	Japan	-	CC5	ST5
SAMD00412225	PRJDB12488	SAMD00412225	Japan	-	CC8	ST8
SAMD00412226	PRJDB12488	SAMD00412226	Japan	-	CC8	ST8
SAMD00412227	PRJDB12488	SAMD00412227	Japan	-	CC1	ST2725
SAMD00412228	PRJDB12488	SAMD00412228	Japan	-	CC8	ST8
SAMD00412229	PRJDB12488	SAMD00412229	Japan	-	CC8	ST8
SAMD00412230	PRJDB12488	SAMD00412230	Japan	-	CC8	ST8
TUM19799	PRJDB10142	SAMD00233983	Japan	2019-10-23	CC1	ST1
TUM20276	PRJDB11169	SAMD00278680	Japan	2018-01-05	CC5	ST5
TUM20277	PRJDB11169	SAMD00278681	Japan	2018-01-06	CC5	ST5
TUM20279	PRJDB11169	SAMD00278683	Japan	2018-05-08	CC8	ST8
TUM20280	PRJDB11169	SAMD00278684	Japan	2018-06-30	CC8	ST8
USA300_1315	PRJDB10169	SAMD00235347	Japan	2014-09-30	CC8	ST8
USA300_1317	PRJDB10169	SAMD00235348	Japan	2014-10-02	CC8	ST8
USA300_1334	PRJDB10169	SAMD00235349	Japan	2017-08-21	CC8	ST8
USA300_1338	PRJDB10169	SAMD00235351	Japan	2018-01-25	CC8	ST8
USA300_1339	PRJDB10169	SAMD00235352	Japan	2018-05-10	CC8	ST8
USA300_1344	PRJDB10169	SAMD00235354	Japan	2018-02-25	CC8	ST8
USA300_1350	PRJDB10169	SAMD00235357	Japan	2019-07-01	CC8	ST8
USA300_1351	PRJDB10169	SAMD00235358	Japan	2019-07-09	CC8	ST8
USA300_1353	PRJDB10169	SAMD00235359	Japan	2019-07-16	CC8	ST8
USA300_1355	PRJDB10169	SAMD00235361	Japan	2019-10-01	CC8	ST8
USA300_FPR3757	PRJNA16313	SAMN02604150	USA:San Francisco	2000/9	CC8	ST8
USA300_JICS155	PRJDB10169	SAMD00235373	Japan	2018-07-18	CC8	ST8
USA300_JICS156	PRJDB10169	SAMD00235374	Japan	2018-07-18	CC8	ST8
USA300_JICS157	PRJDB10169	SAMD00235375	Japan	2018-07-18	CC8	ST8

## Sheet: Supplementary Table 5
Supplementary Table 5. Comparison of number and proportion of S. aureus isolates resistant to 6-drugs (OXA, GEN, ERY, CLI,MNO, and LVX),
3-drugs (OXA, ERY, and LVX) between 1994-2000 and 2019-2020.
		resistant to 6-drugs				resistant to 3-drugs
Years	Total	MRSA	MSSA		Total	MRSA	MSSA
1994-2000	35/183 (19.1%)	35/104 (33.7%)	0/79 (0%)		1/183 (0.6%)	1/104 (0.96%)	0/79 (0%)
2019-2020	32/580 (5.5%)	29/269 (10.8%)	3/311 (0.96%)		114/580 (19.7%)	112/268 (41.6%)	2/311 (0.6%)

## Sheet: Supplementary Table 6
Table S6. Synteny analysis in the 147 complete genomes of ST5 in the NCBI public database
ID	MLST	BioSample accession#	NCBI RefSeq assembly accession#	Assembly level	large chromosomal inversion to reference genome N315
N315	ST5	SAMD00061099	GCF_000009645.1	Complete genome	reference genome
Mu50	ST5	SAMD00061098	GCF_000009665.1	Complete genome	-
Mu3	ST5	SAMD00060910	GCF_000010445.1	Complete genome	-
ED98	ST5	SAMN02604165	GCF_000024585.1	Complete genome	-
ECT-R 2	ST5	SAMEA2271964	GCF_000253135.1	Complete genome	-
502A	ST5	SAMN02690781	GCF_000597965.1	Complete genome	-
FDAARGOS_14	ST5	SAMN03255453	GCF_001018775.2	Complete genome	-
FDAARGOS_48	ST5	SAMN03255487	GCF_001019205.2	Complete genome	-
FDAARGOS_1	ST5	SAMN03255441	GCF_001019255.2	Complete genome	-
FDAARGOS_9	ST5	SAMN03255448	GCF_001019305.2	Complete genome	-
FDAARGOS_25	ST5	SAMN03255464	GCF_001019435.2	Complete genome	●
FDAARGOS_40	ST5	SAMN03255479	GCF_001019495.2	Complete genome	●
FDAARGOS_47	ST5	SAMN03255486	GCF_001019575.2	Complete genome	-
HOU1444-VR	ST5	SAMN03093451	GCF_001278745.1	Complete genome	-
SA564	ST5	SAMN03267711	GCF_001281145.1	Complete genome	-
MI	ST5	SAMD00044982	GCF_001548415.1	Complete genome	-
RIVM6519	ST5	SAMN04590098	GCF_001618305.1	Complete genome	-
ZJ5499	ST5	SAMN03742530	GCF_001640885.1	Complete genome	-
NCCP14558	ST5	SAMN04219574	GCF_001640905.1	Complete genome	-
NCCP14562	ST5	SAMN03955396	GCF_001640925.1	Complete genome	-
FORC_027	ST5	SAMN04046233	GCF_001725965.1	Complete genome	-
UCI62	ST5	SAMN06046111	GCF_001975005.1	Complete genome	-
UCI 28	ST5	SAMN06046106	GCF_001975045.1	Complete genome	-
ISU935	ST5	SAMN04571767	GCF_002204555.1	Complete genome	-
CFSAN007850	ST5	SAMN03763945	GCF_002633805.1	Complete genome	-
CFSAN007894	ST5	SAMN03763989	GCF_002633865.1	Complete genome	-
CC5	ST5	SAMN06480776	GCF_003031485.1	Complete genome	-
AR465	ST5	SAMN07291558	GCF_003073655.1	Complete genome	-
AR461	ST5	SAMN07291554	GCF_003073715.1	Complete genome	-
AR462	ST5	SAMN07291555	GCF_003073775.1	Complete genome	-
AR_0219	ST5	SAMN04901609	GCF_003193705.1	Complete genome	-
AR_0467	ST5	SAMN07291560	GCF_003193885.1	Complete genome	-
AR_0469	ST5	SAMN07291562	GCF_003194005.1	Complete genome	-
AR_0215	ST5	SAMN04901605	GCF_003194025.1	Complete genome	-
CHU15-056	ST5	SAMN06560523	GCF_003194405.1	Complete genome	-
AR_0468	ST5	SAMN07291561	GCF_003203615.1	Complete genome	-
AR_0228	ST5	SAMN04901618	GCF_003203635.1	Complete genome	●
AR_0222	ST5	SAMN04901612	GCF_003203655.1	Complete genome	-
AR_0220	ST5	SAMN04901610	GCF_003203675.1	Complete genome	-
FORC_062	ST5	SAMN07407571	GCF_003351925.1	Complete genome	-
USA 100	ST5	SAMN09220587	GCF_003991015.1	Complete genome	-
592	ST5	SAMN10779665	GCF_004208595.1	Complete genome	-
WCUH29	ST5	SAMN11360115	GCF_004785995.1	Complete genome	-
D592-HR	ST5	SAMN11823231	GCF_005890035.1	Complete genome	-
D592	ST5	SAMN11823228	GCF_005954685.1	Complete genome	-
aureus	ST5	SAMN08969227	GCF_006088835.1	Complete genome	-
B2-15A	ST5	SAMN12353686	GCF_007726495.1	Complete genome	-
B4-59C	ST5	SAMN12359201	GCF_007726525.1	Complete genome	-
B8-13D	ST5	SAMN12359203	GCF_007726545.1	Complete genome	-
B3-17D	ST5	SAMN12359200	GCF_007726565.1	Complete genome	-
KG-03	ST5	SAMD00164374	GCF_009176765.1	Complete genome	-
KG-18	ST5	SAMD00164376	GCF_009176785.1	Complete genome	-
KG-22	ST5	SAMD00164378	GCF_009176875.1	Complete genome	-
CFSAN007894	ST5	SAMN03763989	GCF_009650155.1	Complete genome	-
P2D8C1	ST5	SAMN10374695	GCF_009739675.1	Complete genome	-
P2D1C1	ST5	SAMN10374694	GCF_009739695.1	Complete genome	-
P2D15C1	ST5	SAMN10374696	GCF_009739715.1	Complete genome	-
P1D9C1	ST5	SAMN10374691	GCF_009739735.1	Complete genome	-
P1D8C2	ST5	SAMN10374690	GCF_009739755.1	Complete genome	-
P1D8C1	ST5	SAMN10374689	GCF_009739775.1	Complete genome	-
P1D7C1	ST5	SAMN10374688	GCF_009739795.1	Complete genome	-
P1D5C1	ST5	SAMN10374686	GCF_009739825.1	Complete genome	-
P1D1C1	ST5	SAMN10374685	GCF_009739845.1	Complete genome	-
P1D14C1	ST5	SAMN10374693	GCF_009739865.1	Complete genome	-
P1D12C1	ST5	SAMN10374692	GCF_009739885.1	Complete genome	-
P1D5C2	ST5	SAMN10374687	GCF_009740205.1	Complete genome	-
UP_1632	ST5	SAMN11175644	GCF_009911835.1	Complete genome	-
UP_296	ST5	SAMN11175600	GCF_009913055.1	Complete genome	-
SR153	ST5	SAMN13008646	GCF_010669265.1	Complete genome	●
14640	ST5	SAMN14375129	GCF_013305905.1	Complete genome	-
14505	ST5	SAMN14375125	GCF_013305955.1	Complete genome	-
14507	ST5	SAMN14375126	GCF_013307025.1	Complete genome	-
834	ST5	SAMD00258402	GCF_016591995.1	Complete genome	-
KZN	ST5	SAMN15828263	GCF_017798245.1	Complete genome	-
2007-13	ST5	SAMD00276649	GCF_018409145.1	Complete genome	-
HL17064	ST5	SAMN17301231	GCF_019550945.1	Complete genome	●
HL18883	ST5	SAMN17301236	GCF_019551035.1	Complete genome	-
HL21008	ST5	SAMN17301239	GCF_019551095.1	Complete genome	-
HL18807	ST5	SAMN17301234	GCF_019551315.1	Complete genome	-
HL18888	ST5	SAMN17301237	GCF_019551375.1	Complete genome	-
HL20835	ST5	SAMN17301238	GCF_019551415.1	Complete genome	-
AATYW	ST5	SAMN17729804	GCF_020906975.2	Complete genome	-
UNC_SaCF13	ST5	SAMN23701157	GCF_021172905.1	Complete genome	-
UNC_SaCF07	ST5	SAMN23701155	GCF_021172945.1	Complete genome	-
Patient 14, Isolate 02	ST5	SAMN22513885	GCF_021869805.1	Complete genome	-
NV_1	ST5	SAMN20356340	GCF_022221545.1	Complete genome	-
NAS_AN_233	ST5	SAMN15567950	GCF_022405205.1	Complete genome	-
NAS_AN_203	ST5	SAMN15567944	GCF_022405255.1	Complete genome	-
NAS_AN_184	ST5	SAMN15567943	GCF_022405275.1	Complete genome	-
NAS_AN_115	ST5	SAMN15567929	GCF_022405375.1	Complete genome	-
NAS_AN_111	ST5	SAMN15567928	GCF_022405395.1	Complete genome	-
NAS_AN_079	ST5	SAMN15567920	GCF_022405455.1	Complete genome	-
NAS_AN_044	ST5	SAMN15567914	GCF_022405555.1	Complete genome	-
NAS_OP_154	ST5	SAMN15567998	GCF_022405655.1	Complete genome	-
NAS_OP_098	ST5	SAMN15567987	GCF_022405755.1	Complete genome	-
NAS_NP_198	ST5	SAMN15567970	GCF_022405855.1	Complete genome	-
NAS_AN_239	ST5	SAMN15567951	GCF_022405915.1	Complete genome	-
NAS_AN_205	ST5	SAMN15567946	GCF_022405935.1	Complete genome	-
NAS_AN_204	ST5	SAMN15567945	GCF_022405955.1	Complete genome	-
NAS_AN_176	ST5	SAMN15567941	GCF_022405995.1	Complete genome	-
NAS_AN_143	ST5	SAMN15567935	GCF_022406075.1	Complete genome	-
VMRSA-WC062	ST5	SAMN26026633	GCF_022691325.1	Complete genome	-
VMRSA-WC052	ST5	SAMN26026632	GCF_022691345.1	Complete genome	-
MRSA-WC101	ST5	SAMN26026631	GCF_022691365.1	Complete genome	-
MRSA-WC090	ST5	SAMN26026630	GCF_022691385.1	Complete genome	-
MRSA-WC061	ST5	SAMN26026629	GCF_022691405.1	Complete genome	-
MRSA-WC000	ST5	SAMN26026628	GCF_022691425.1	Complete genome	-
VMRSA-WC123	ST5	SAMN26026642	GCF_022693165.1	Complete genome	-
VMRSA-WC121	ST5	SAMN26026641	GCF_022693185.1	Complete genome	-
VRMSSA-WC113	ST5	SAMN26026640	GCF_022693205.1	Complete genome	-
VRMSSA-WC111	ST5	SAMN26026639	GCF_022693225.1	Complete genome	-
VMRSA-WC102	ST5	SAMN26026638	GCF_022693245.1	Complete genome	-
VMRSA-WC083	ST5	SAMN26026637	GCF_022693265.1	Complete genome	-
VMRSA-WC082	ST5	SAMN26026636	GCF_022693285.1	Complete genome	-
VMRSA-WC081	ST5	SAMN26026635	GCF_022693305.1	Complete genome	-
VMRSA-WC071	ST5	SAMN26026634	GCF_022693325.1	Complete genome	-
WA121-2010_15611	ST5	SAMN26754767	GCF_022699245.1	Complete genome	-
WA121-2021_16354	ST5	SAMN26754981	GCF_022699265.1	Complete genome	-
WA121-2021_15363	ST5	SAMN26754980	GCF_022699285.1	Complete genome	-
ATCC 29213	ST5	SAMN27067580	GCF_022832775.1	Complete genome	-
ATCC 29213	ST5	SAMN20104198	GCF_022870465.1	Complete genome	-
494	ST5	SAMN27101937	GCF_023658665.1	Complete genome	-
Gwen	ST5	SAMN31523639	GCF_026625405.1	Complete genome	-
ATCC 23235	ST5	SAMN32977648	GCF_028596145.1	Complete genome	-
CHAL2	ST5	SAMN35018950	GCF_030064025.1	Complete genome	-
SASWT1215	ST5	SAMN30089067	GCF_030168515.1	Complete genome	-
AF4001	ST5	SAMN32369491	GCF_030408935.1	Complete genome	-
AF4004	ST5	SAMN32369492	GCF_030408955.1	Complete genome	-
HP20814-006	ST5	SAMN32369494	GCF_030408995.1	Complete genome	-
HP20814-062	ST5	SAMN32369496	GCF_030409035.1	Complete genome	-
SA35-SX	ST5	SAMN36429675	GCF_030533535.1	Complete genome	-
SA31-SX	ST5	SAMN36429671	GCF_030533625.1	Complete genome	-
SA05-SX	ST5	SAMN36429645	GCF_030534175.1	Complete genome	-
UNC_SA54	ST5	SAMN36911164	GCF_030758835.1	Complete genome	-
UNC_SA55	ST5	SAMN36911165	GCF_030758855.1	Complete genome	-
UNC_SA48	ST5	SAMN36911163	GCF_030758875.1	Complete genome	-
UNC_SA38	ST5	SAMN36911161	GCF_030758895.1	Complete genome	-
KNIH_5618	ST5	SAMN37234478	GCF_031826835.1	Complete genome	-
BSN131	ST5	SAMN38637709	GCF_037414495.1	Complete genome	-
TUM22707	ST5	SAMN40554550	GCF_038024745.1	Complete genome	-
TUM22702	ST5	SAMN40554548	GCF_038025155.1	Complete genome	-
BSN181	ST5	SAMN38637761	GCF_038048995.1	Complete genome	-
BSN164	ST5	SAMN38637744	GCF_038096305.1	Complete genome	-
NZAK3	ST5	SAMEA3733527	GCF_900017775.1	Complete genome	-
BPH2819	ST5	SAMEA5099551	GCF_900620225.1	Complete genome	-
P3.1	ST5	SAMEA6377381	GCF_903932595.1	Complete genome	-
HU-14	ST5	SAMEA6377380	GCF_903932605.1	Complete genome	-
